# Supplementary material for: Regioselective 6-endo-dig iodocyclization: an accessible approach for iodo-benzo[a]phenazines
Source: Royal Society of Chemistry journal article supplement (doi:10.1039/c7ob00671c), 2017-01-01

## ***Supporting Information***

### **Regioselective 6-endo-dig Iodocyclization: An accessible approach for Iodo-benzo[*a*]phenazines**

Sonu Kumar,<sup>a</sup> Mohammad Mujahid<sup>b</sup> and Akhilesh K. Verma<sup>a\*</sup>

<sup>a</sup>*Synthetic Organic Chemistry Research Laboratory, Department of Chemistry,*

*University of Delhi, Delhi, 110007, India*

<sup>b</sup>*Wolfson college, University of Oxford, U.K.*

| <b><i>S.No</i></b> | <b><i>Contents</i></b>                            | <b><i>Page No.</i></b> |
|--------------------|---------------------------------------------------|------------------------|
| <b><i>1</i></b>    | X-ray crystallographic studies                    | S2-S3                  |
| <b><i>2</i></b>    | References                                        | S4-S4                  |
| <b><i>9</i></b>    | Copies of <sup>1</sup> H and <sup>13</sup> C NMRs | S6-S147                |

# X-ray crystallographic studies

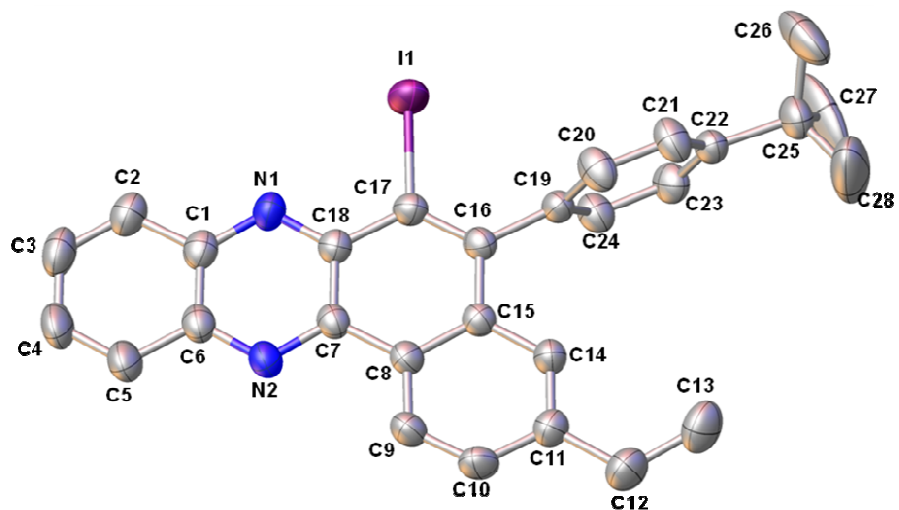

**Figure S1.** ORTEP drawing of compound **5e** drawn at 50% probability level

The structure of **5e** was solved by the direct methods using SIR-92 and refined by full-matrix least-squares refinement techniques on  $F^2$  using SHELXL97.<sup>2</sup> The hydrogen atoms were placed into the calculated positions and included in the last cycles of the refinement. All calculations were done using Wingx software package.<sup>3</sup>

CCDC numbers of **5e** is 1518194.

Table 1. Crystal data and structure refinement for **5e**

|                                             |                                                               |                        |
|---------------------------------------------|---------------------------------------------------------------|------------------------|
| Empirical formula                           | C <sub>28</sub> H <sub>25</sub> I N <sub>2</sub>              |                        |
| Formula weight                              | 516.40                                                        |                        |
| Temperature                                 | 293(2) K                                                      |                        |
| Wavelength                                  | 0.71073 Å                                                     |                        |
| Crystal system                              | Triclinic                                                     |                        |
| Space group                                 | <i>P</i> -1                                                   |                        |
| Unit cell dimensions                        | <i>a</i> = 9.6023(3) Å                                        | <i>α</i> = 118.262(4)° |
|                                             | <i>b</i> = 11.8204(4) Å                                       | <i>β</i> = 99.616(3)°  |
|                                             | <i>c</i> = 12.0014(6) Å                                       | <i>γ</i> = 94.267(3)°  |
| Volume                                      | 1164.32(9) Å <sup>3</sup>                                     |                        |
| Z                                           | 2                                                             |                        |
| Density (calculated)                        | 1.473 Mg/m <sup>3</sup>                                       |                        |
| Absorption coefficient                      | 1.393 mm <sup>-1</sup>                                        |                        |
| <i>F</i> (000)                              | 520                                                           |                        |
| Crystal size                                | 0.230 x 0.220 x 0.180 mm <sup>3</sup>                         |                        |
| Theta range for data collection             | 3.204 to 24.998°.                                             |                        |
| Index ranges                                | -11 ≤ <i>h</i> ≤ 11, -14 ≤ <i>k</i> ≤ 14, -14 ≤ <i>l</i> ≤ 14 |                        |
| Reflections collected                       | 13986                                                         |                        |
| Independent reflections                     | 4098 [R(int) = 0.0298]                                        |                        |
| Completeness to theta = 24.998°             | 99.8 %                                                        |                        |
| Absorption correction                       | Semi-empirical from equivalents                               |                        |
| Max. and min. transmission                  | 0.776 and 0.735                                               |                        |
| Refinement method                           | Full-matrix least-squares on <i>F</i> <sup>2</sup>            |                        |
| Data / restraints / parameters              | 4098 / 0 / 284                                                |                        |
| Goodness-of-fit on <i>F</i> <sup>2</sup>    | 1.032                                                         |                        |
| Final R indices [I > 2σ (I)] <sup>a,b</sup> | R <sub>1</sub> = 0.0314, wR <sub>2</sub> = 0.0697             |                        |
| R indices (all data)                        | R <sub>1</sub> = 0.0391, wR <sub>2</sub> = 0.0728             |                        |
| Largest diff. peak and hole                 | 0.678 and -0.303 e.Å <sup>-3</sup>                            |                        |

$$^a R = \sum (\|F_o| - |F_c|) / \sum |F_o|; ^b wR = \{\sum [w(F_o^2 - F_c^2)^2] / \sum [w(F_o^2)^2]\}^{1/2}$$

## References

1. a) *SMART: Bruker Molecular Analysis Research Tool*, version 5.618. Bruker Analytical X-ray System, **2000**. b) *SAINTE-NT*, version 6.45, Bruker Analytical X-Ray System, **2003**. c) *SHELXTL-NT*, version 6.10, Bruker Analytical X-ray System, **2000**.
2. G. M. Sheldrick, *Acta Cryst.*, **2008**, A64, 112-122.
3. L. J. Farrugia, WinGX Version 1.80.05, *An integrated system of Windows Programs for the Solution, Refinement and Analysis of Single Crystal X-Ray Diffraction Data*; Department of Chemistry, University of Glasgow (**1997-2009**).

# Copies of $^1\text{H}$ and $^{13}\text{C}$ NMR

<sup>1</sup>H NMR

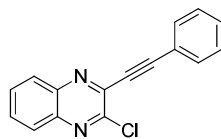

2-Chloro-3-(phenylethynyl)quinoxaline (1aa)

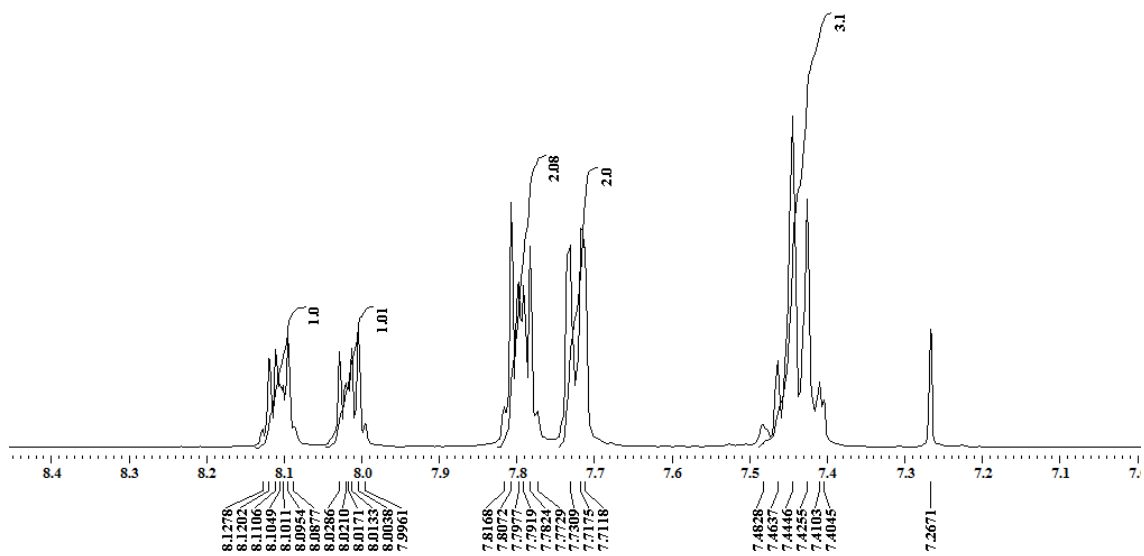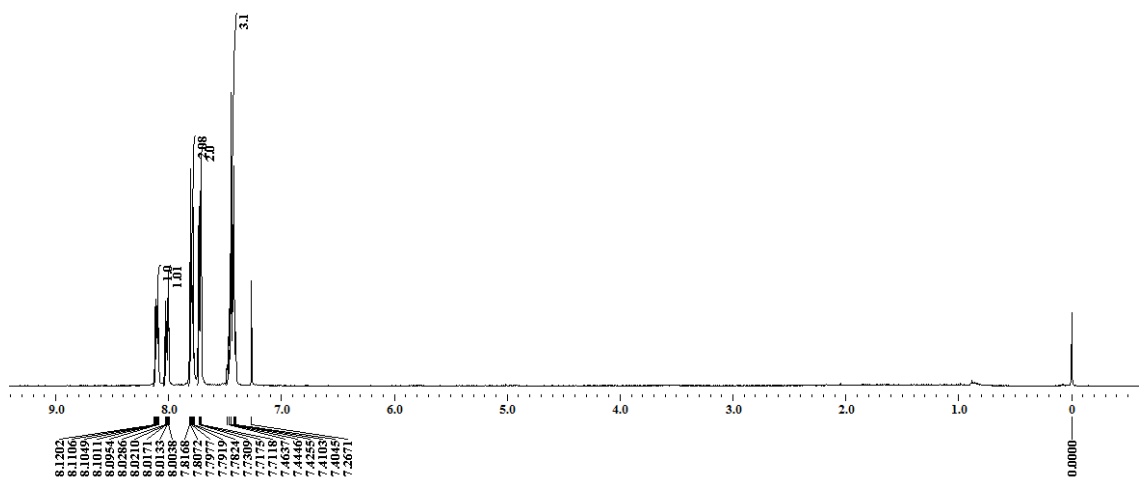

$^{13}\text{C}\{^1\text{H}\}$  NMR

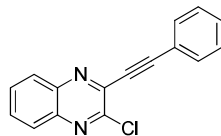

2-Chloro-3-(phenylethynyl)quinoxaline (1aa)

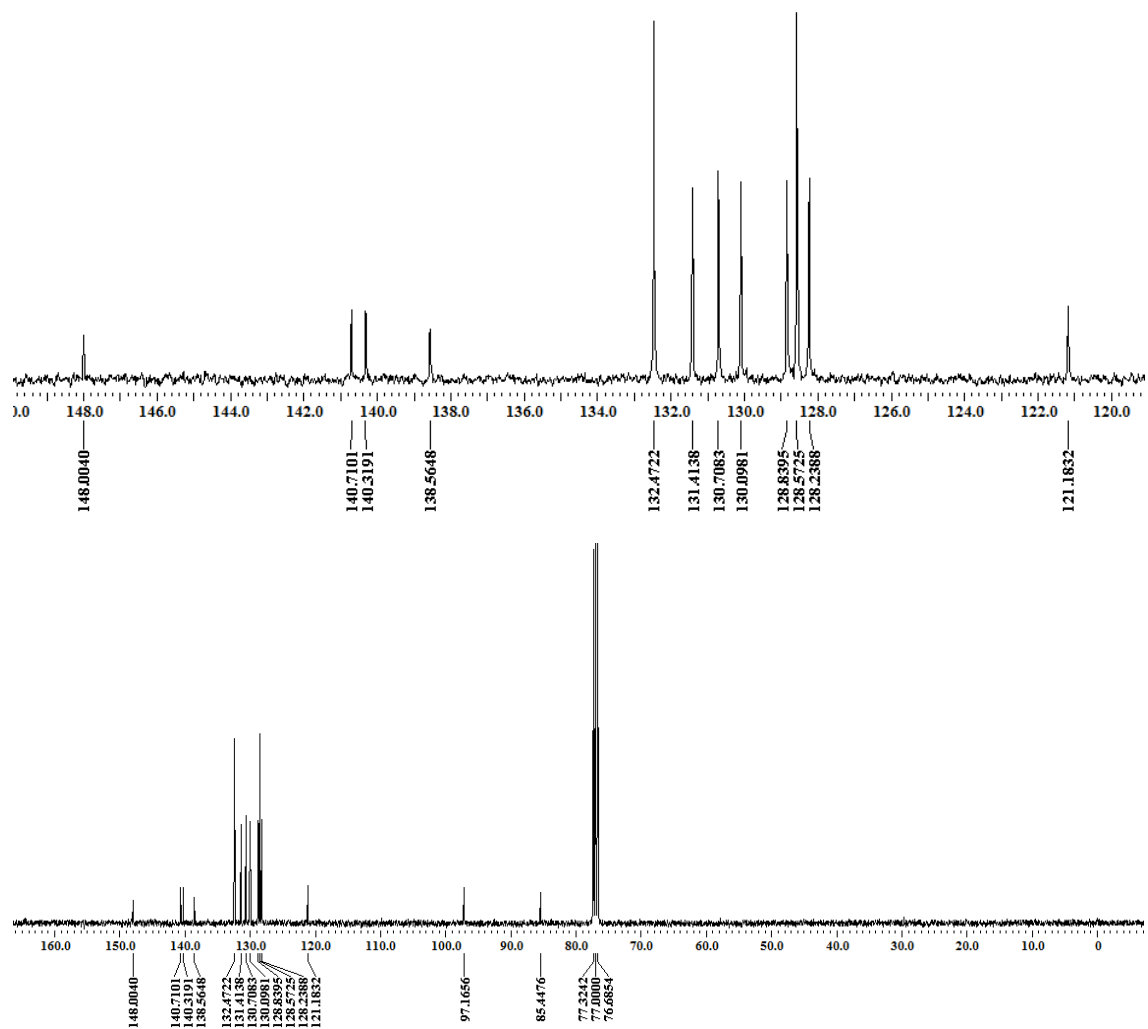

<sup>1</sup>H NMR

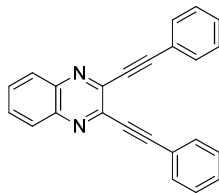

2,3-bis(Phenylethynyl)quinoxaline (1a)

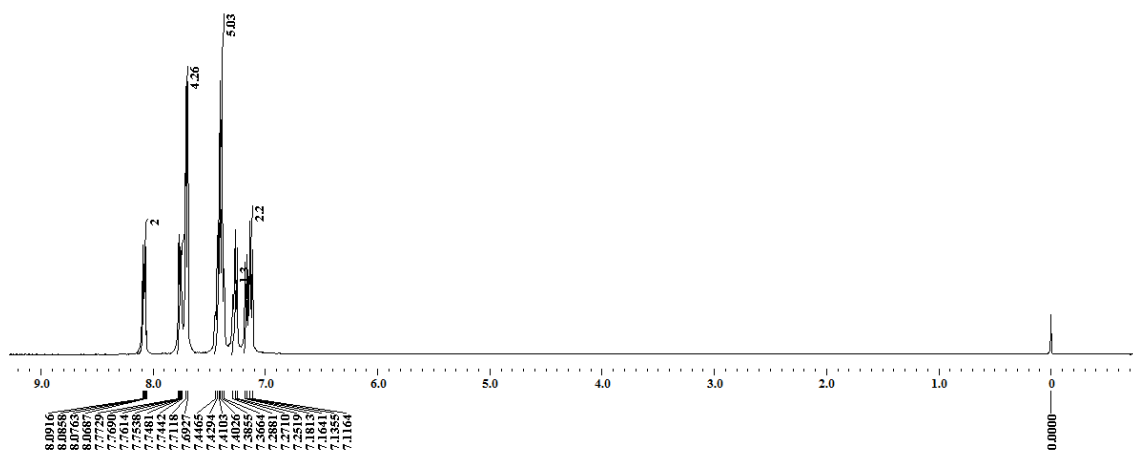



$^{13}\text{C}\{^1\text{H}\}$  NMR

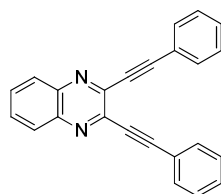

**2,3-bis(Phenylethynyl)quinoxaline (1ab)**

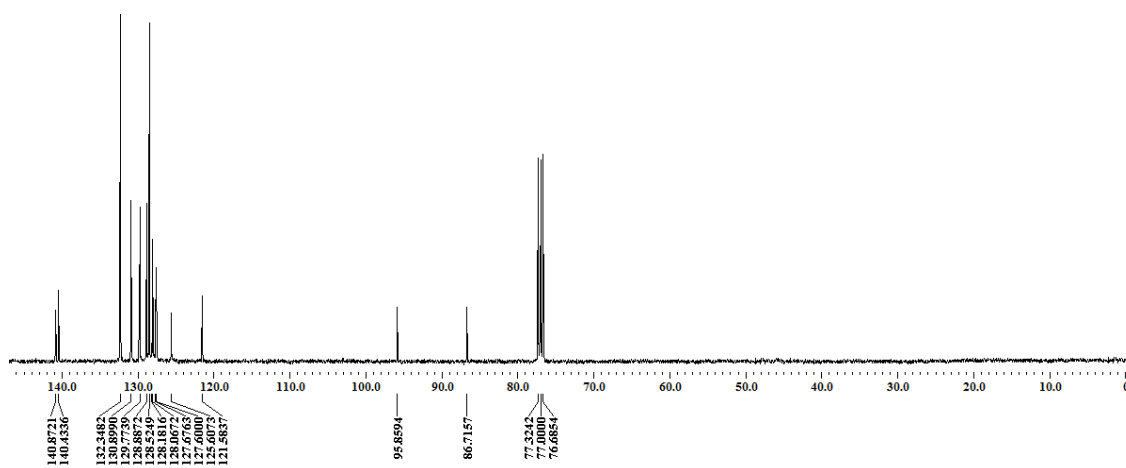

# HRMS

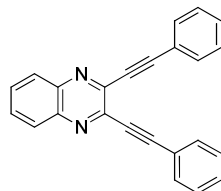

**2,3-bis(Phenylethynyl)quinoxaline (1ab)**

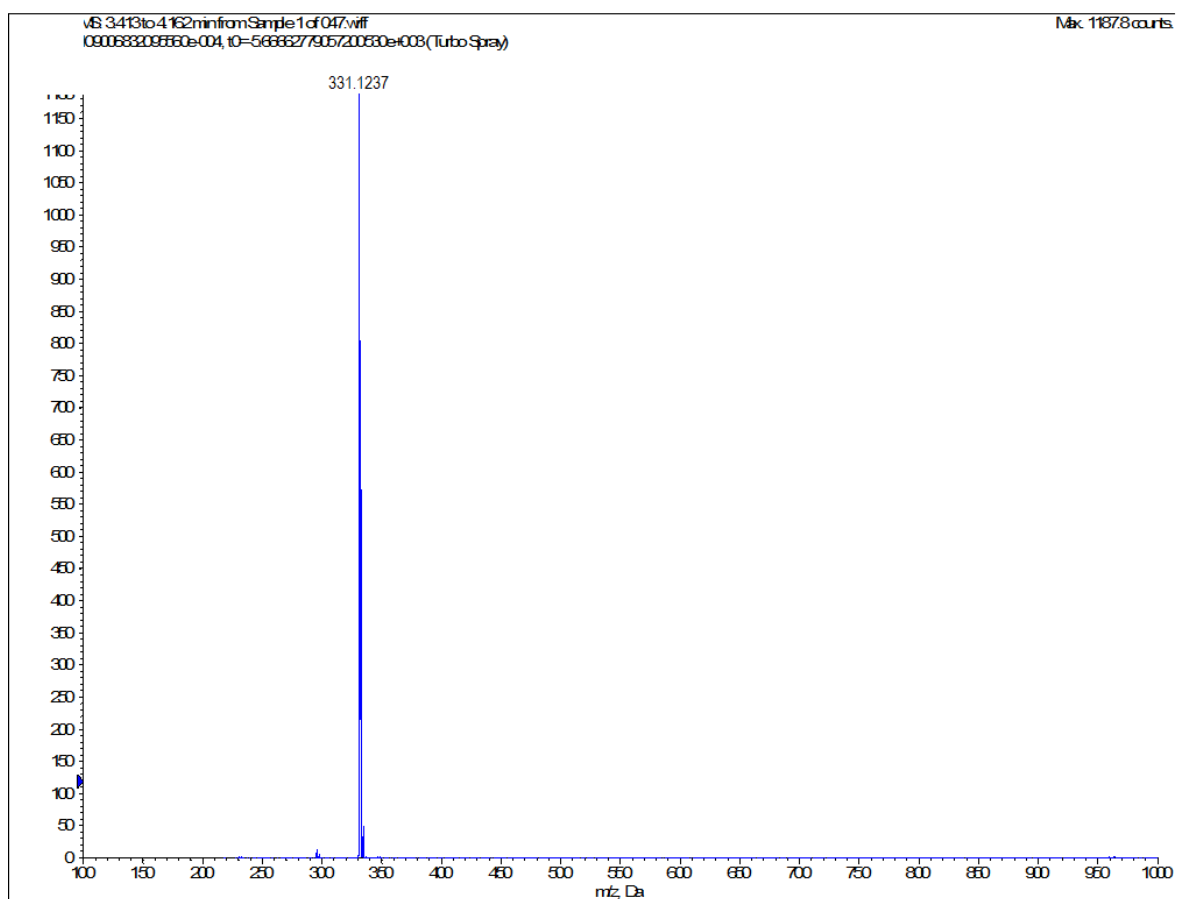

# <sup>1</sup>H NMR

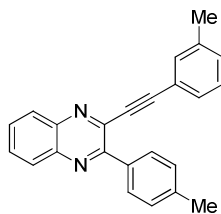

**2-(*p*-Tolyl)-3-(*m*-tolyethynyl)quinoxaline (4b)**

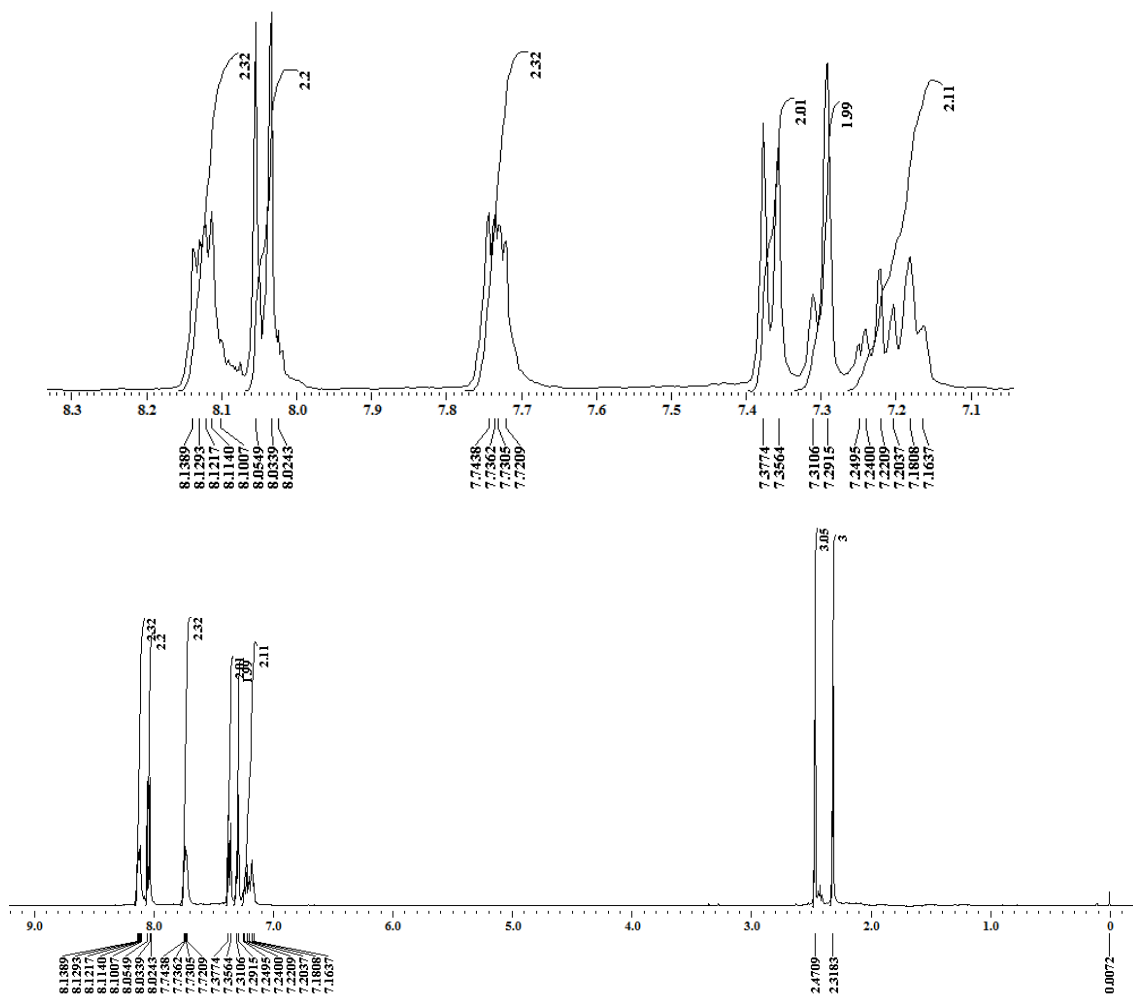

$^{13}\text{C}\{^1\text{H}\}$  NMR

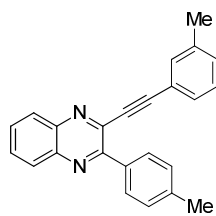

2-(*p*-Tolyl)-3-(*m*-tolyethynyl)quinoxaline (4b)

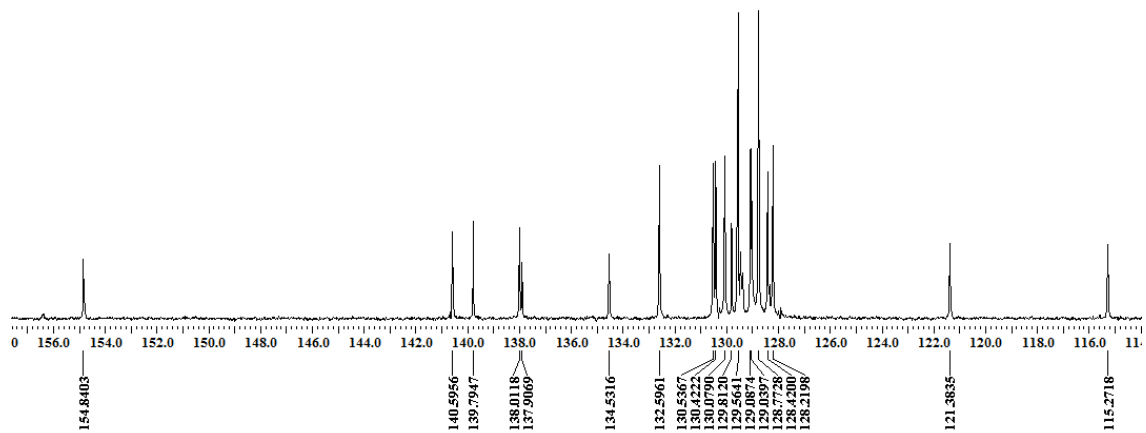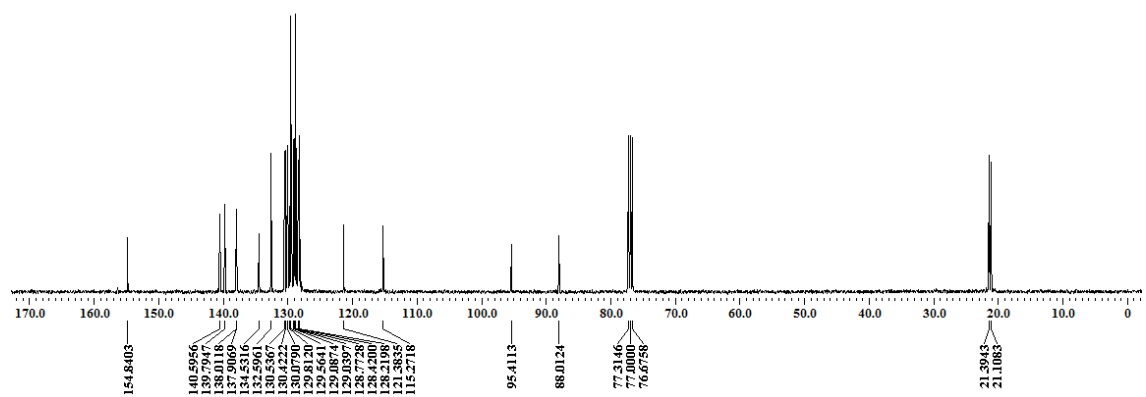

# HRMS

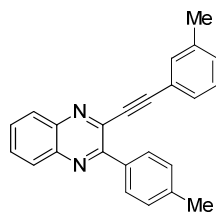

**2-(p-Tolyl)-3-(m-tolyethynyl)quinoxaline (4b)**

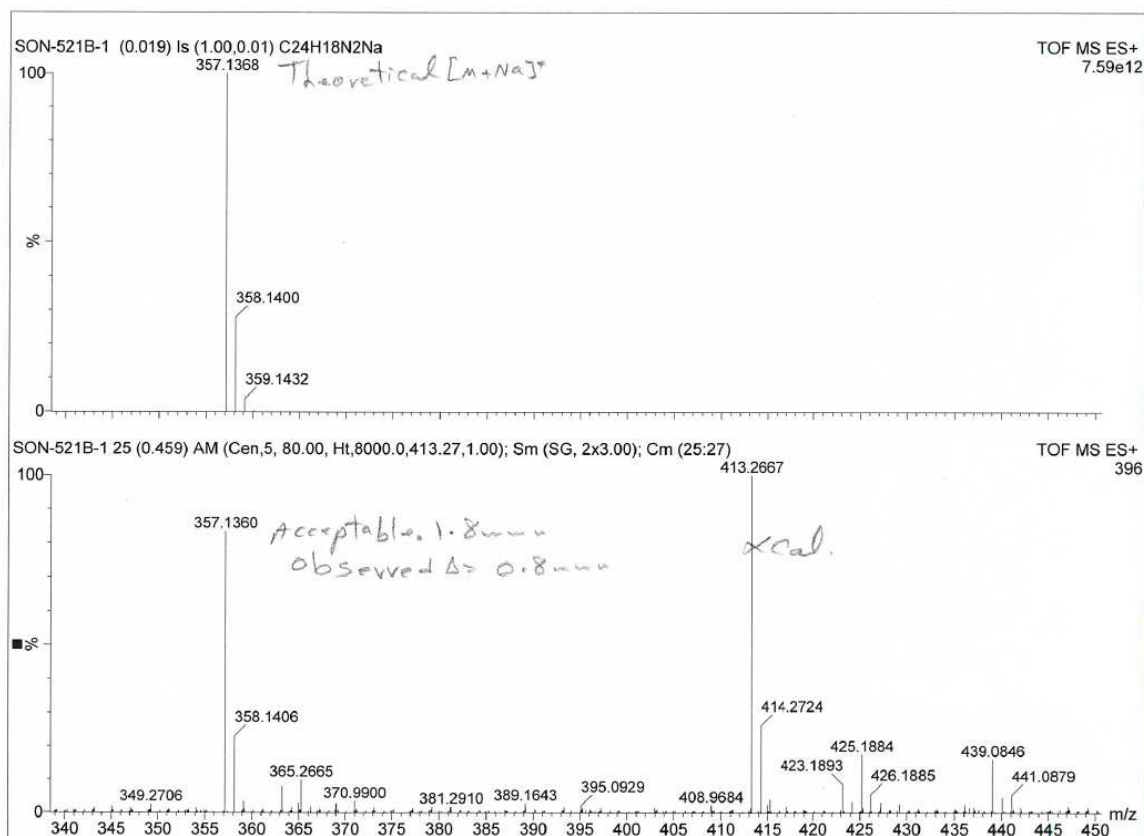

# <sup>1</sup>H NMR

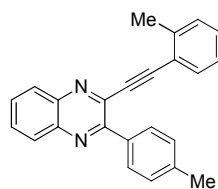

2-(*p*-Tolyl)-3-(*o*-tolylethynyl)quinoxaline (4c)

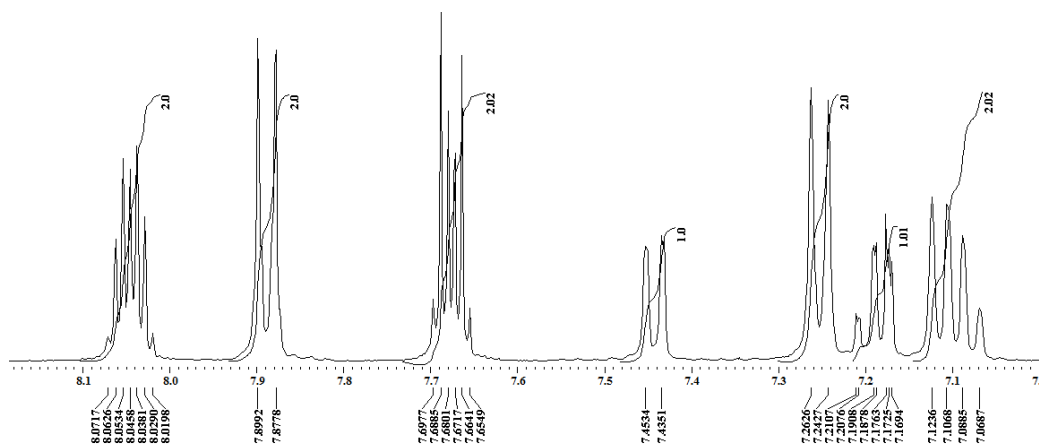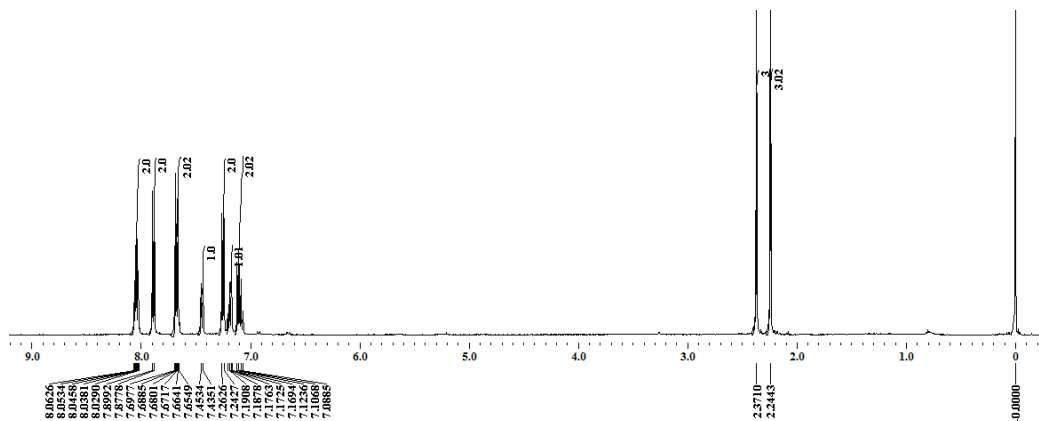

$^{13}\text{C}\{^1\text{H}\}$  NMR

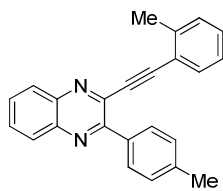

**2-(*p*-Tolyl)-3-(*o*-tolylethynyl)quinoxaline (4c)**

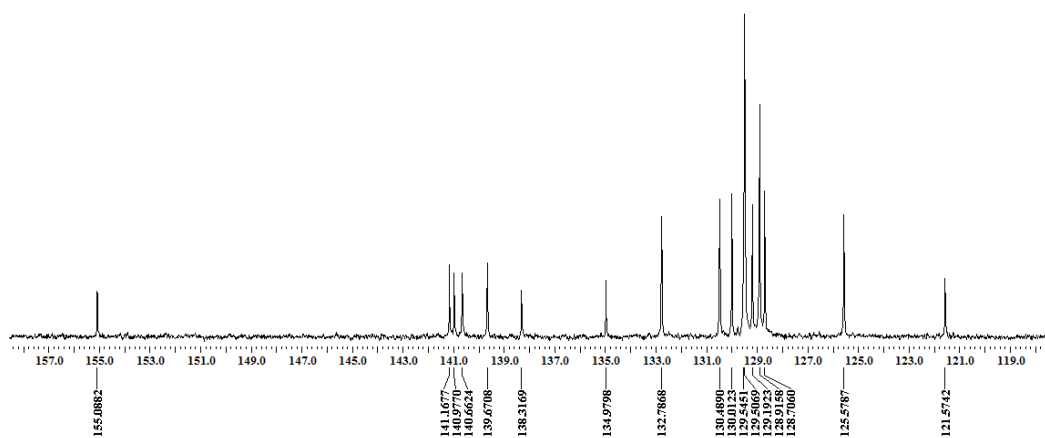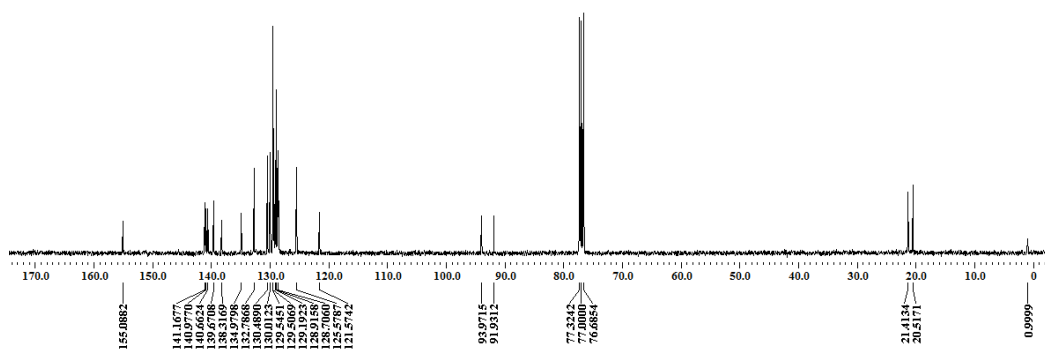

### HRMS

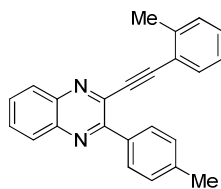

**2-(p-Tolyl)-3-(o-tolyethynyl)quinoxaline (4c)**

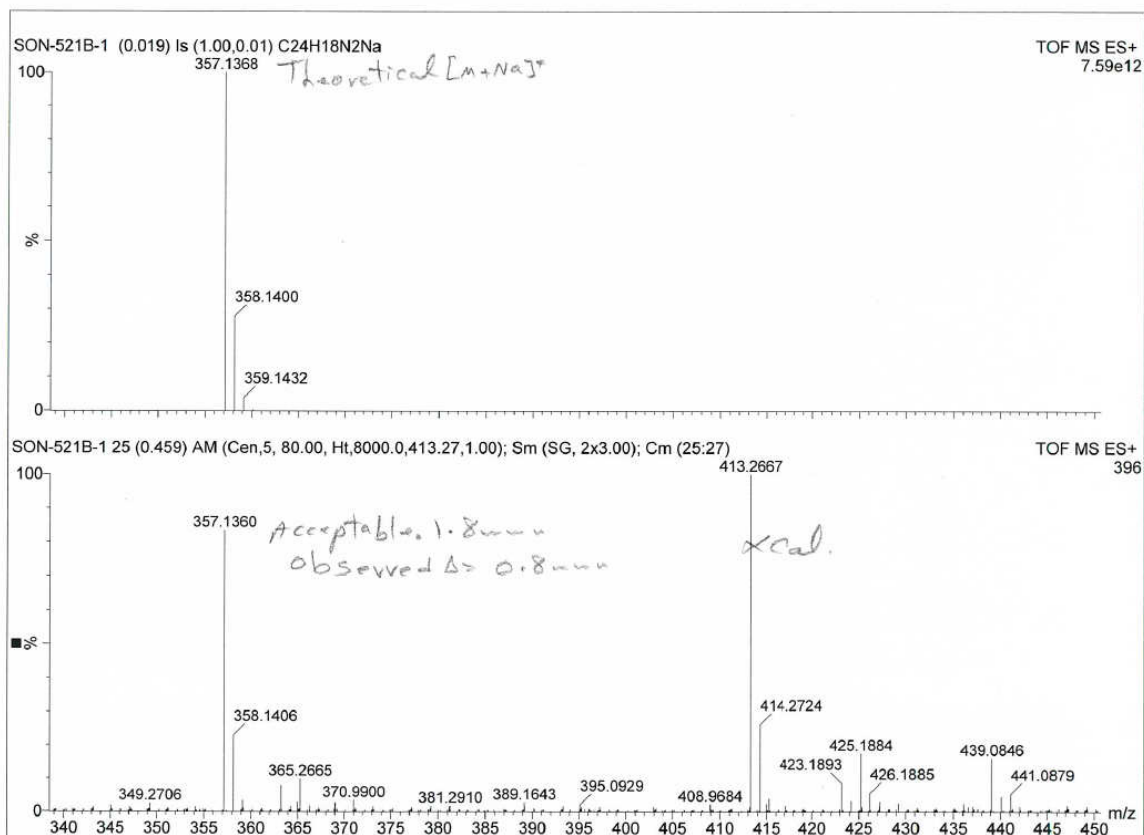



# <sup>1</sup>H NMR

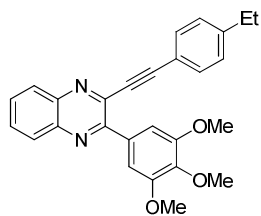

2-((4-Ethylphenyl)ethynyl)-3-(3,4,5-trimethoxyphenyl)quinoxaline (4k)

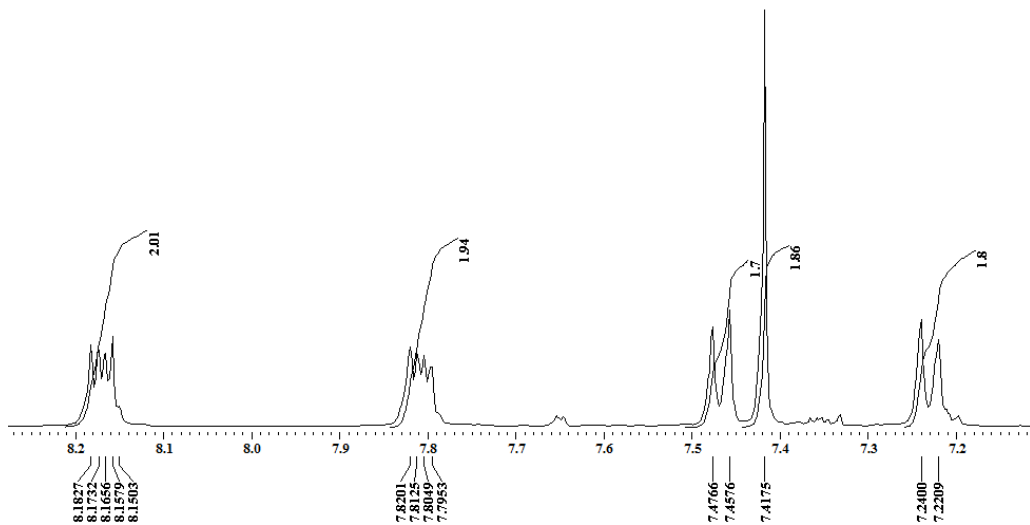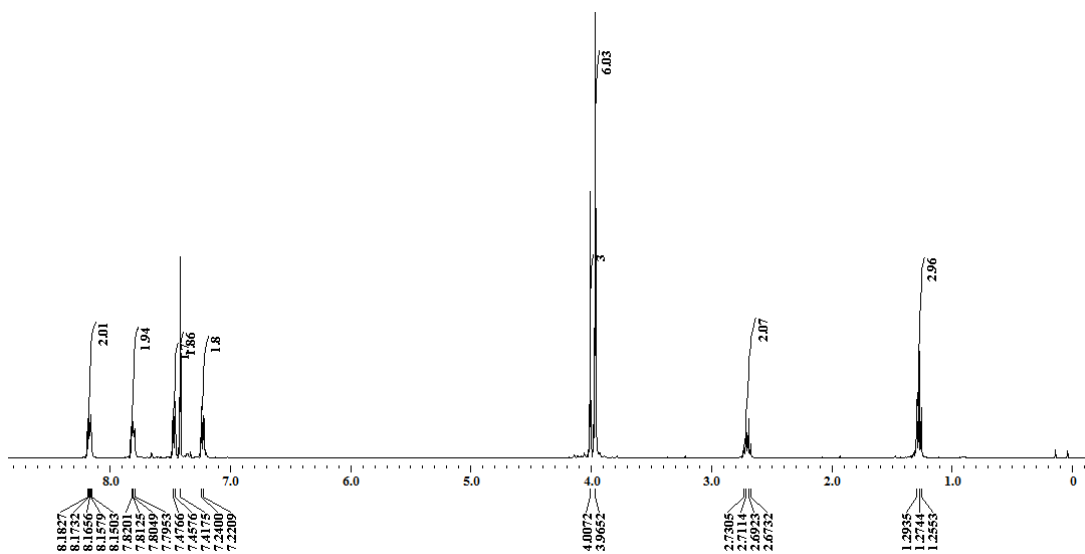

$^{13}\text{C}\{^1\text{H}\}$  NMR

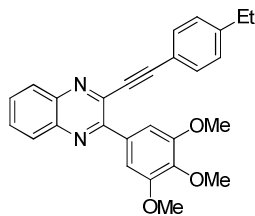

2-((4-Ethylphenyl)ethynyl)-3-(3,4,5-trimethoxyphenyl)quinoxaline (4k)

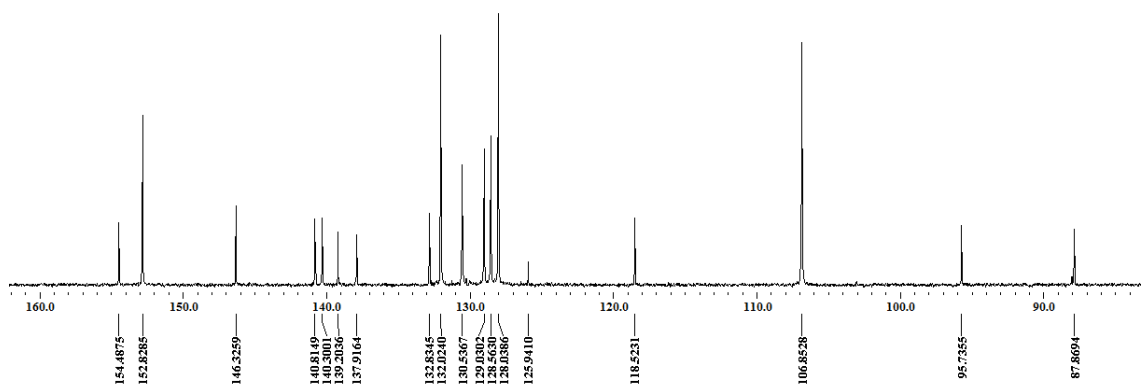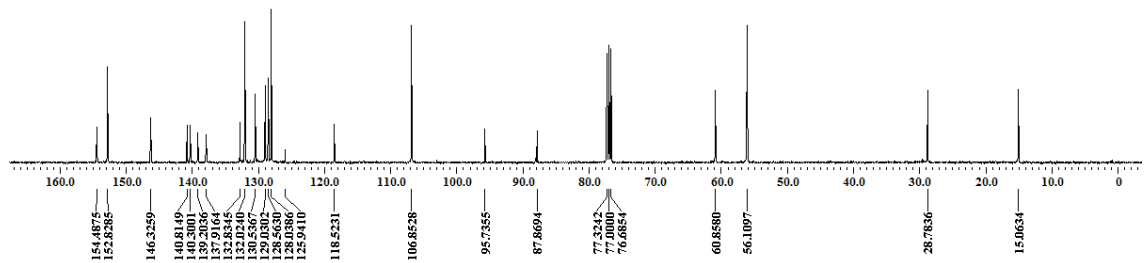

## HRMS

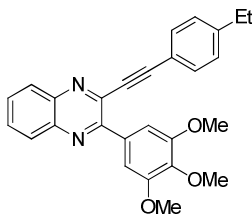

## 2-((4-Ethylphenyl)ethynyl)-3-(3,4,5-trimethoxyphenyl)quinoxaline (4k)

### Qualitative Compound Report

|                               |              |                      |                     |
|-------------------------------|--------------|----------------------|---------------------|
| <b>Data File</b>              | AB-806.d     | <b>Sample Name</b>   | AB-806              |
| <b>Sample Type</b>            | Sample       | <b>Position</b>      | P1-B4               |
| <b>Instrument Name</b>        | Instrument 1 | <b>User Name</b>     | SMILY               |
| <b>Acq Method</b>             | 29.10.2014.m | <b>Acquired Time</b> | 22-12-2015 14:46:10 |
| <b>IRM Calibration Status</b> | Success      | <b>DA Method</b>     | Default.m           |

|                       |                             |
|-----------------------|-----------------------------|
| <b>Sample Group</b>   | <b>Info.</b>                |
| <b>Acquisition SW</b> | 6200 series TOF/6500 series |
| <b>Version</b>        | Q-TOF B.05.01 (B5125)       |

#### Compound Table

| Compound Label       | RT | Mass     | Formula       | MFG Formula   | MFG Diff (ppm) | DB Formula    |
|----------------------|----|----------|---------------|---------------|----------------|---------------|
| Cpd 2: C27 H24 N2 O3 | 11 | 424.1789 | C27 H24 N2 O3 | C27 H24 N2 O3 | -0.6           | C27 H24 N2 O3 |

| Compound Label       | m/z      | RT | Algorithm                 | Mass     |
|----------------------|----------|----|---------------------------|----------|
| Cpd 2: C27 H24 N2 O3 | 425.1862 | 11 | Find by Molecular Feature | 424.1789 |

#### MFE MS Spectrum

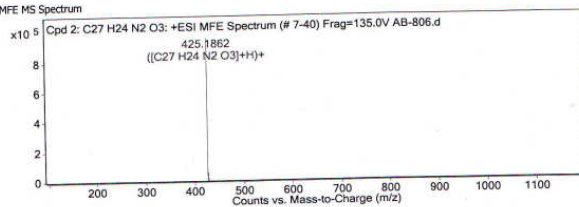

#### MFE MS Zoomed Spectrum

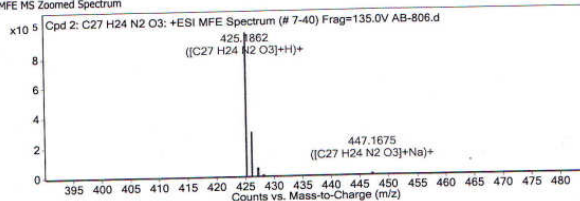

#### MS Spectrum Peak List

| m/z      | z | Abund     | Formula       | Ion     |
|----------|---|-----------|---------------|---------|
| 425.1862 | 1 | 961540.75 | C27 H24 N2 O3 | (M+H)+  |
| 426.1893 | 1 | 282890.66 | C27 H24 N2 O3 | (M+H)+  |
| 427.1935 | 1 | 52579.08  | C27 H24 N2 O3 | (M+H)+  |
| 428.1981 | 1 | 7854.3    | C27 H24 N2 O3 | (M+H)+  |
| 429.2045 | 1 | 968.76    | C27 H24 N2 O3 | (M+H)+  |
| 447.1675 | 1 | 6535.51   | C27 H24 N2 O3 | (M+Na)+ |
| 448.1708 | 1 | 1949.64   | C27 H24 N2 O3 | (M+Na)+ |
| 449.171  | 1 | 518.09    | C27 H24 N2 O3 | (M+Na)+ |

<sup>1</sup>H NMR

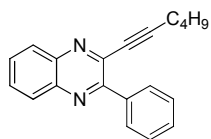

2-(Hex-1-yn-1-yl)-3-phenylquinoxaline (4s)

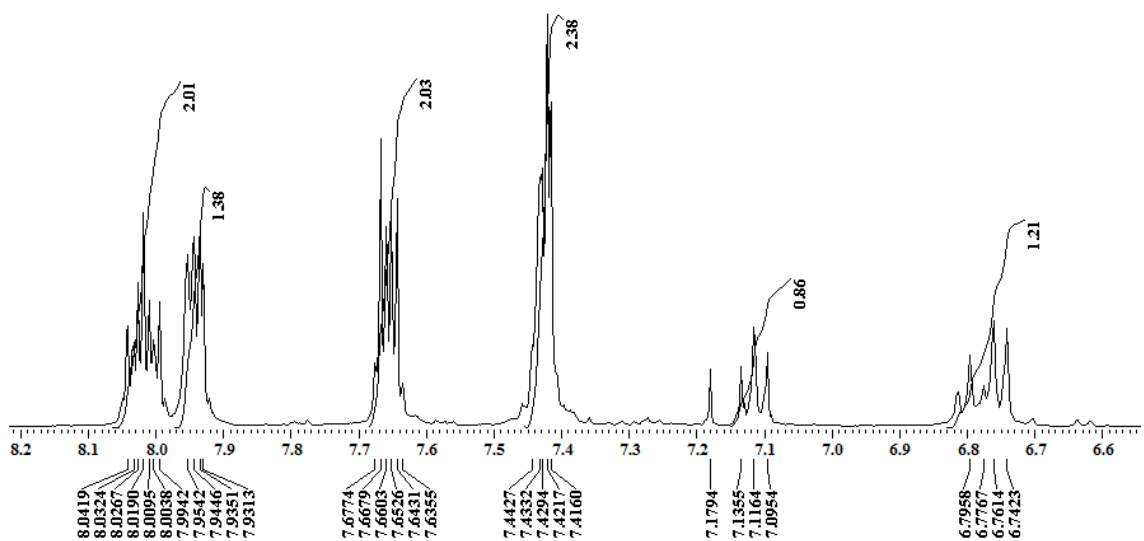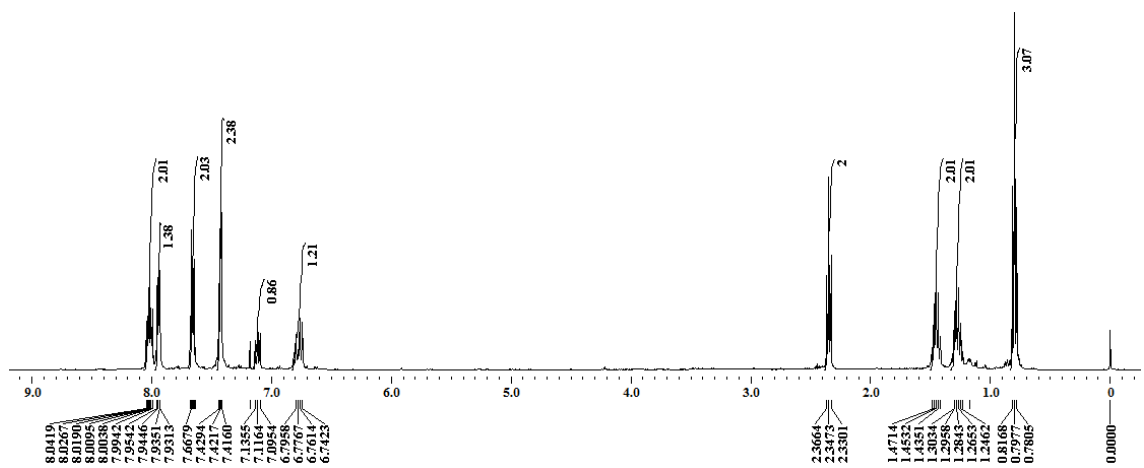

$^{13}\text{C}\{^1\text{H}\}$  NMR

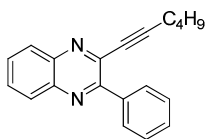

2-(Hex-1-yn-1-yl)-3-phenylquinoxaline (4s)

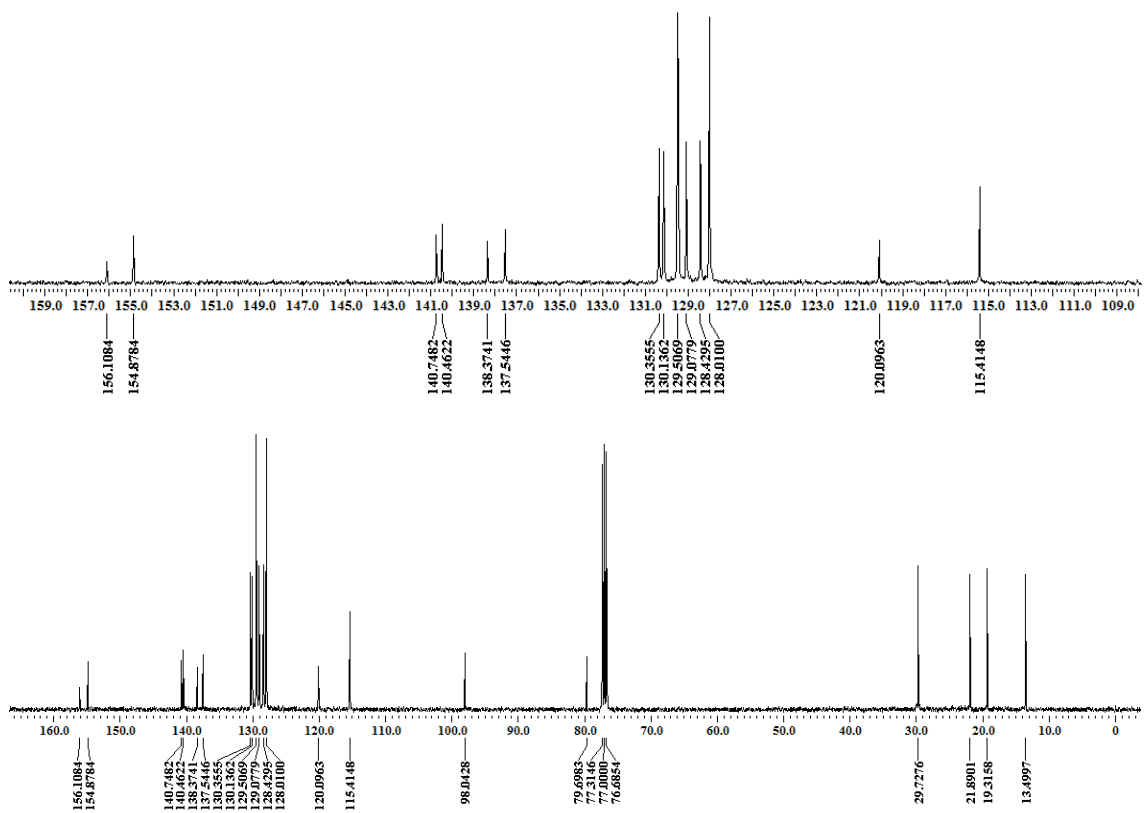

# <sup>1</sup>H NMR

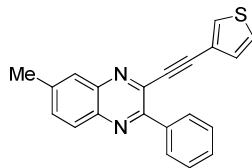

**6-methyl-2-phenyl-3-(thiophen-3-ylethynyl)quinoxaline (6a)**

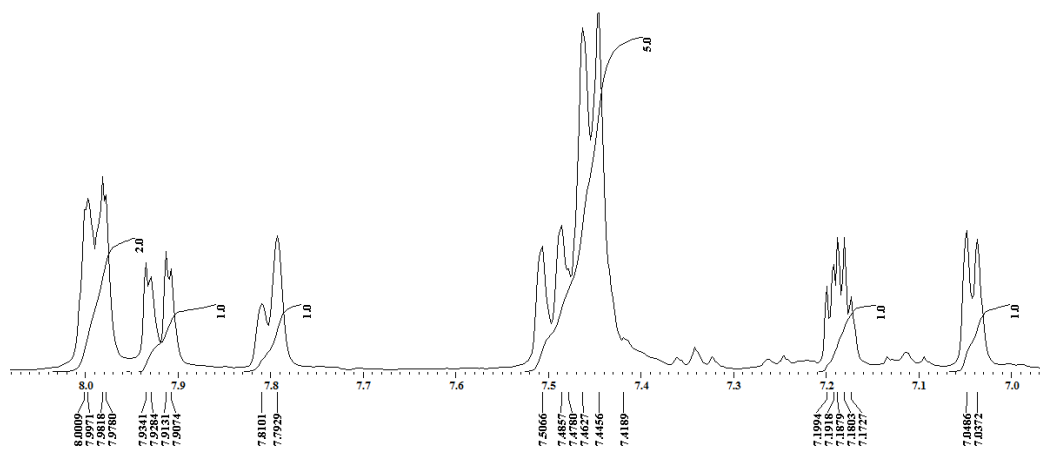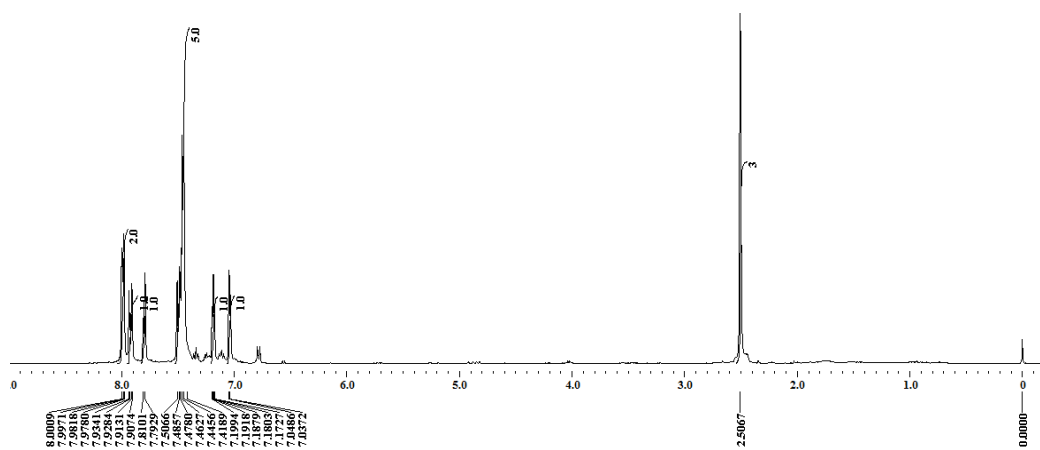

$^{13}\text{C}\{^1\text{H}\}$  NMR

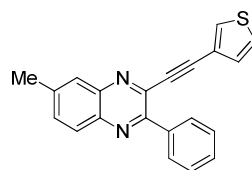

6-methyl-2-phenyl-3-(thiophen-3-ylethynyl)quinoxaline (6a)

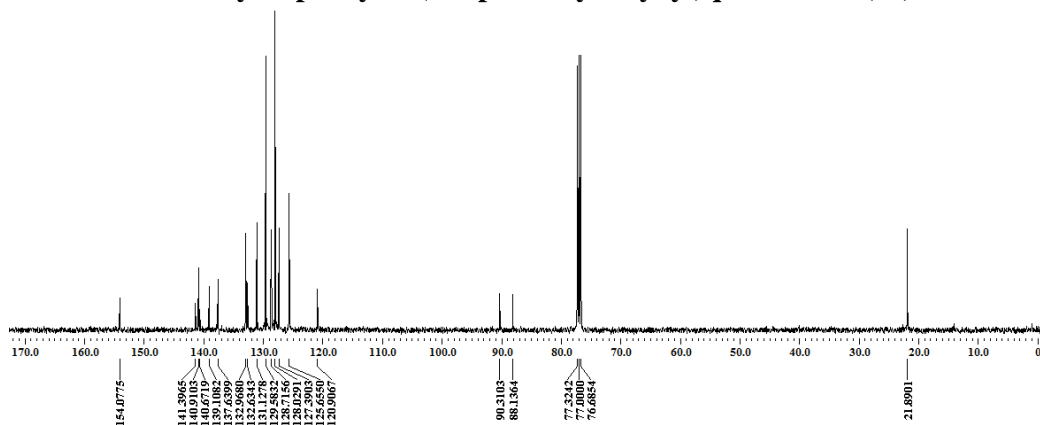

# HRMS

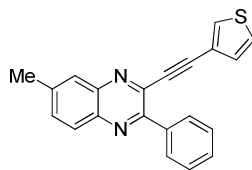

**6-methyl-2-phenyl-3-(thiophen-3-ylethynyl)quinoxaline (6a)**

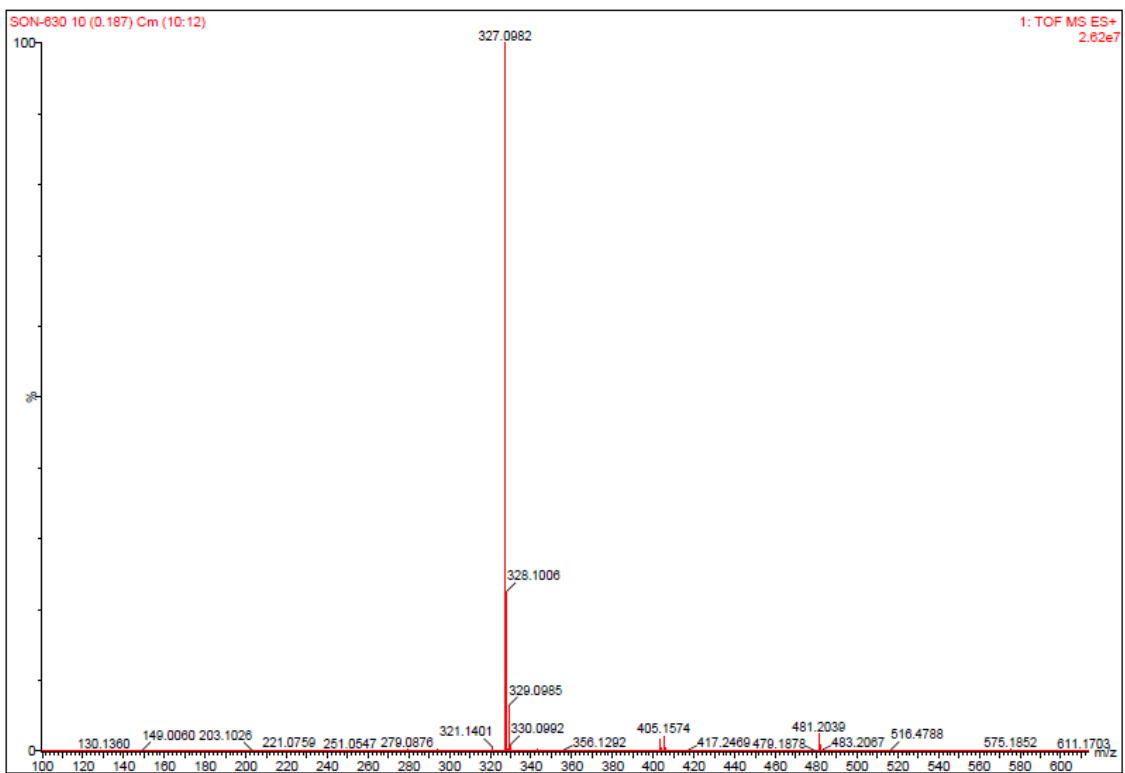



# <sup>1</sup>H NMR

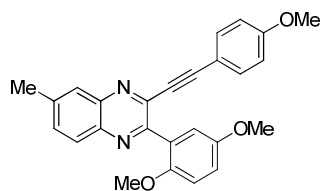

**2-(2,5-Dimethoxyphenyl)-3-((4-methoxyphenyl)ethynyl)-6-methylquinoxaline (6c)**

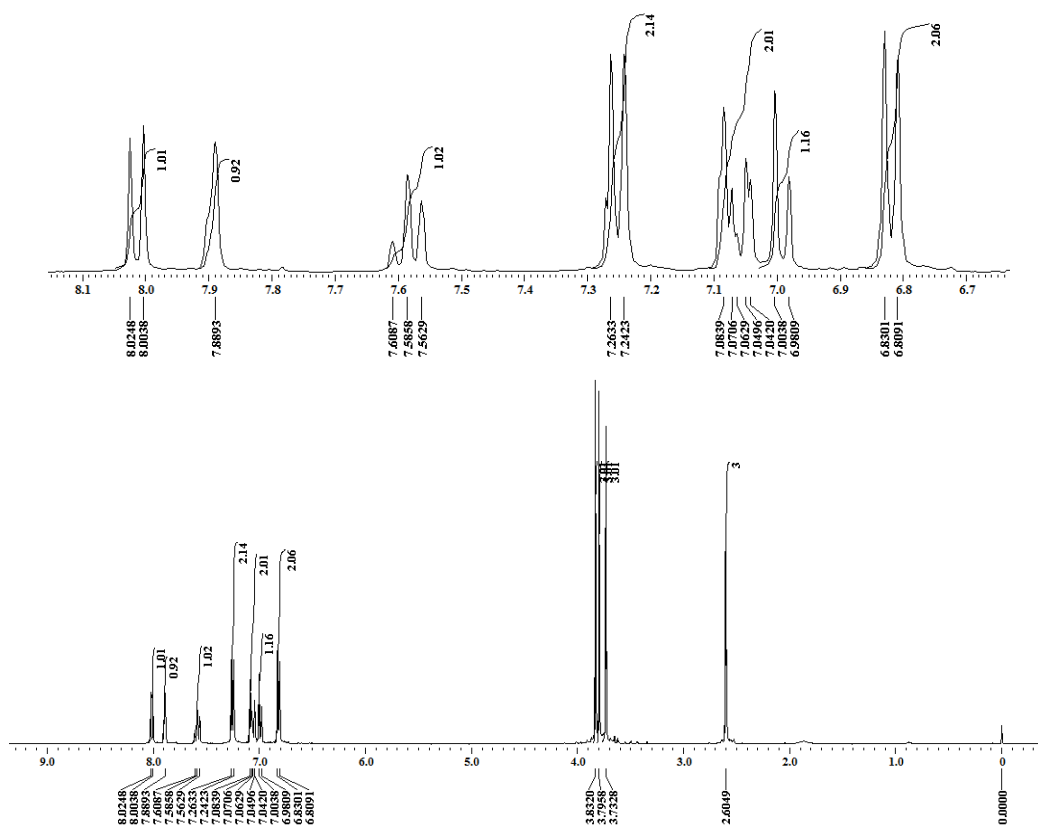

$^{13}\text{C}\{^1\text{H}\}$  NMR

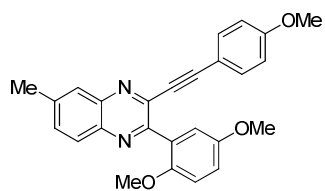

2-(2,5-Dimethoxyphenyl)-3-((4-methoxyphenyl)ethynyl)-6-methylquinoxaline  
(6c)

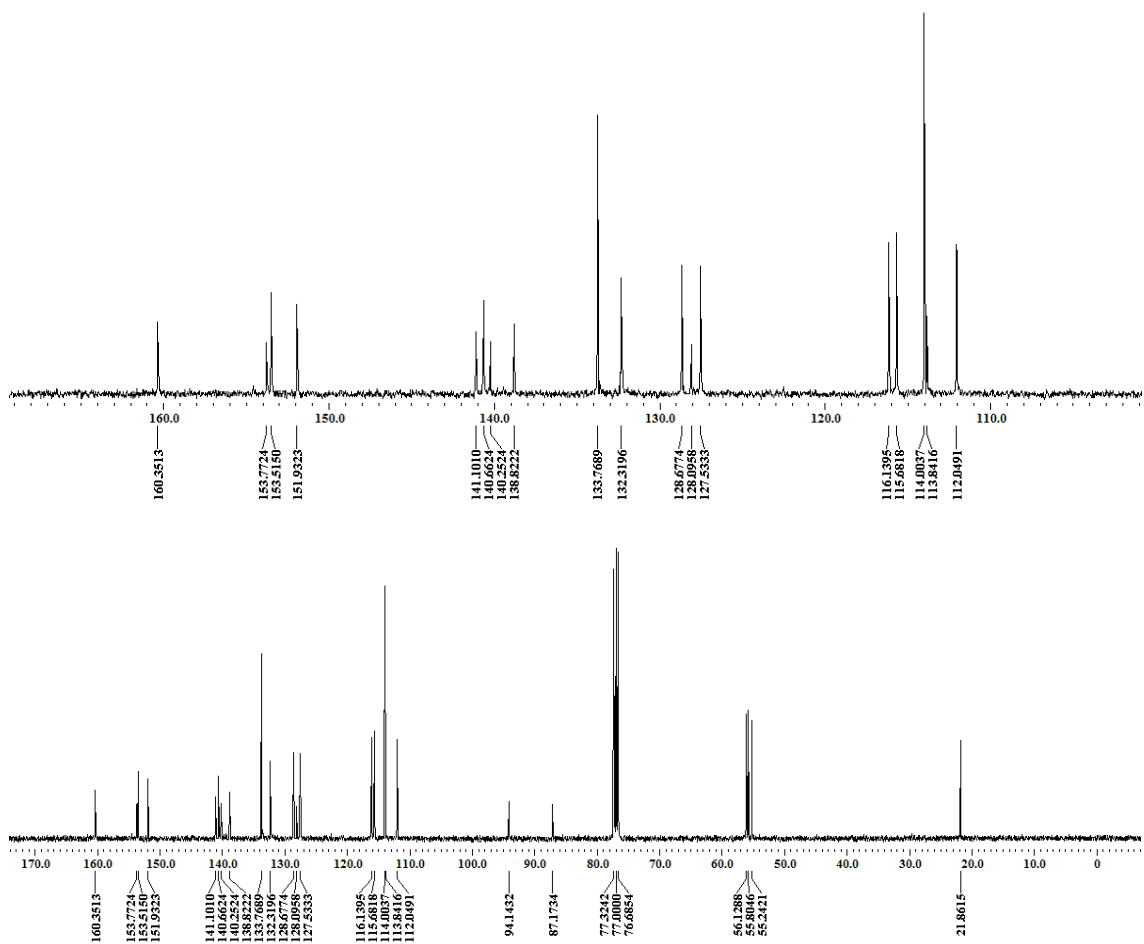

# HRMS

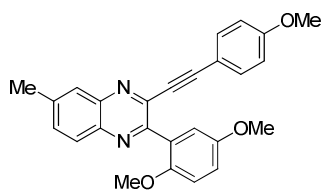

**2-(2,5-Dimethoxyphenyl)-3-((4-methoxyphenyl)ethynyl)-6-methylquinoxaline (6c)**

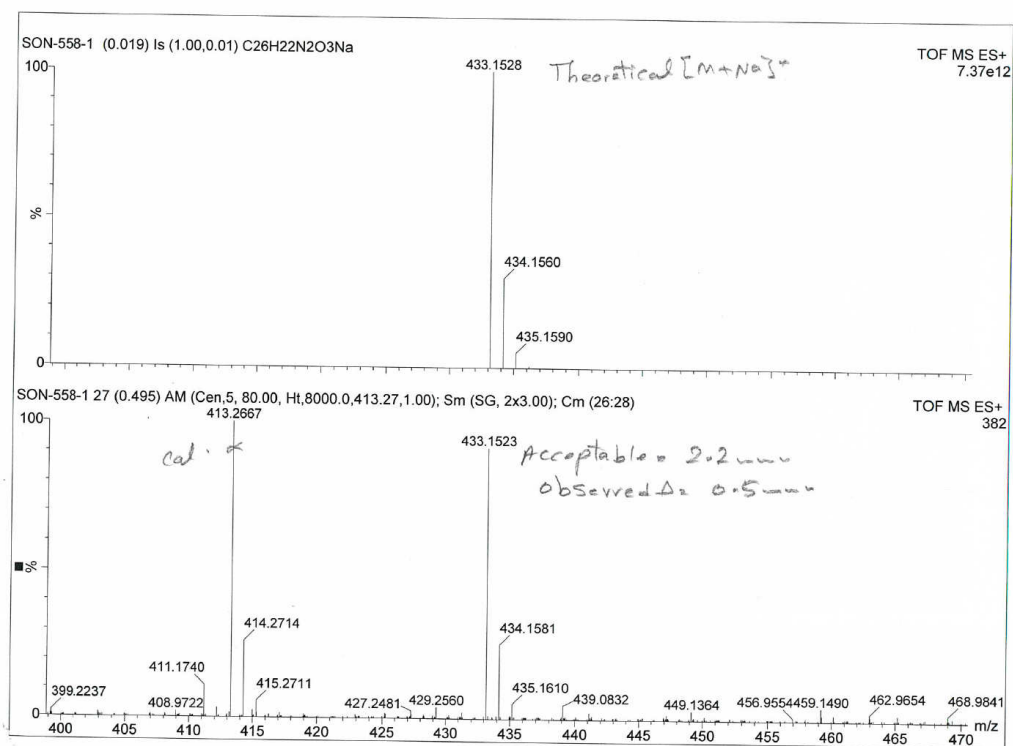

<sup>1</sup>H NMR

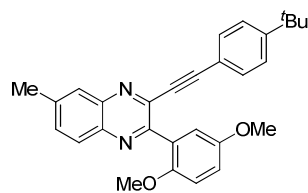

**3-((4-(tert-Butyl)phenyl)ethynyl)-2-(2,5-dimethoxyphenyl)-6-methylquinoxaline (6d)**

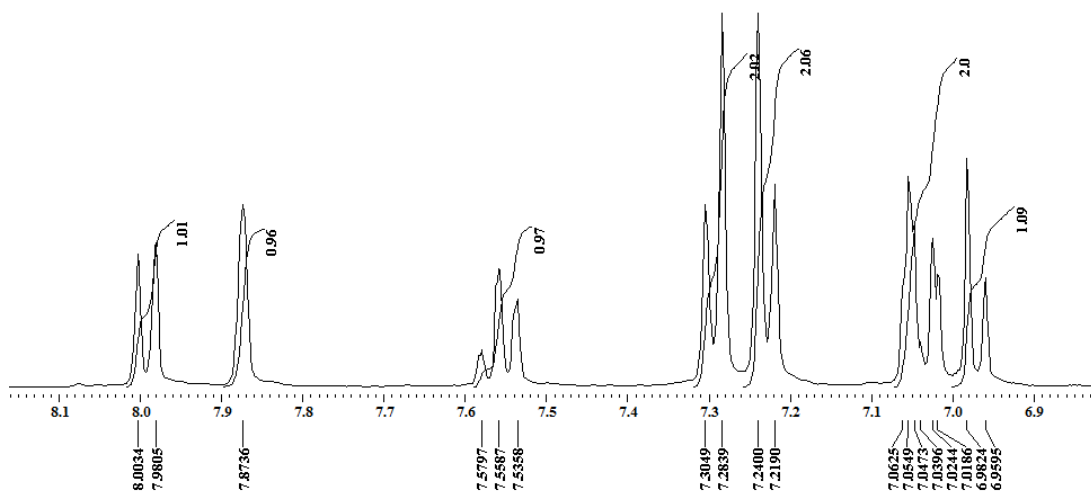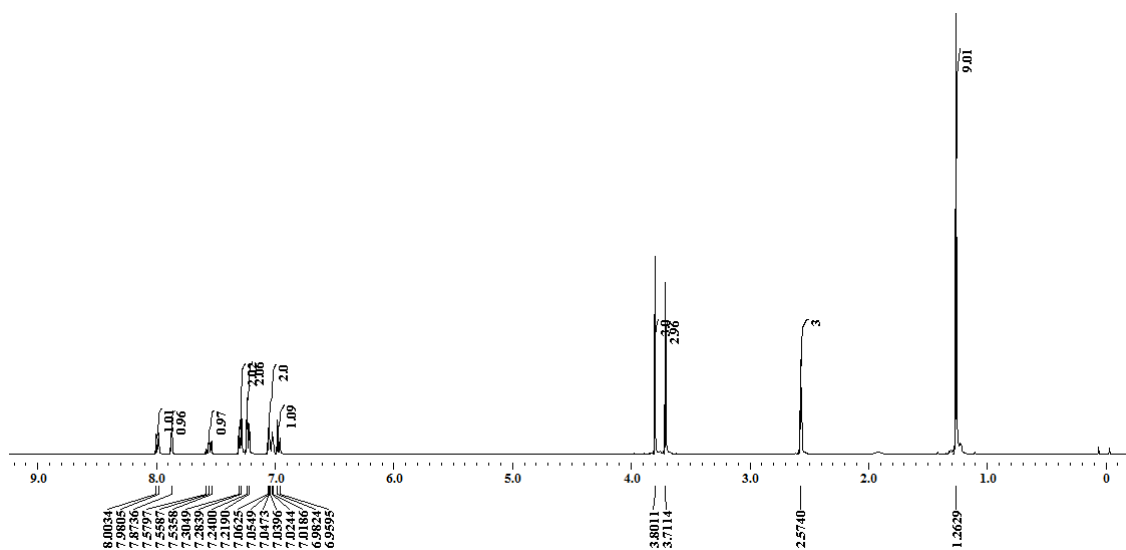

$^{13}\text{C}\{^1\text{H}\}$  NMR

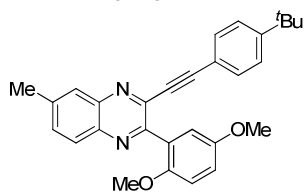

**3-((4-(tert-Butyl)phenyl)ethynyl)-2-(2,5-dimethoxyphenyl)-6-methylquinoxaline (6d)**

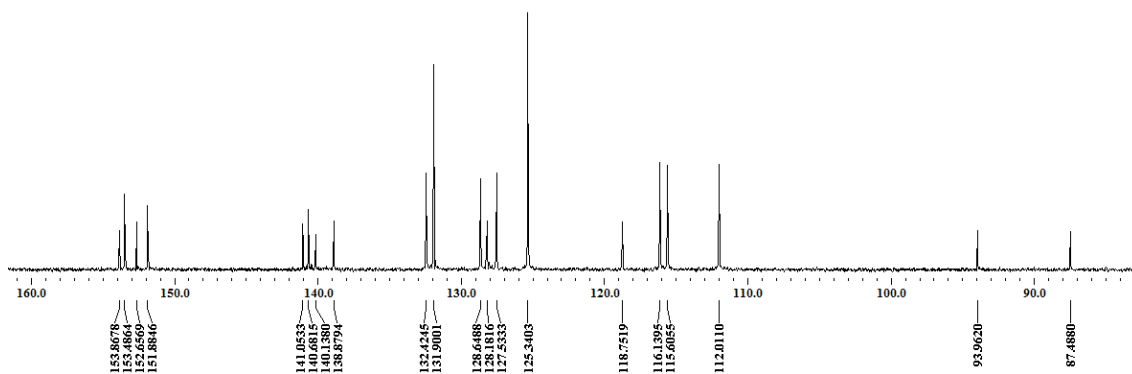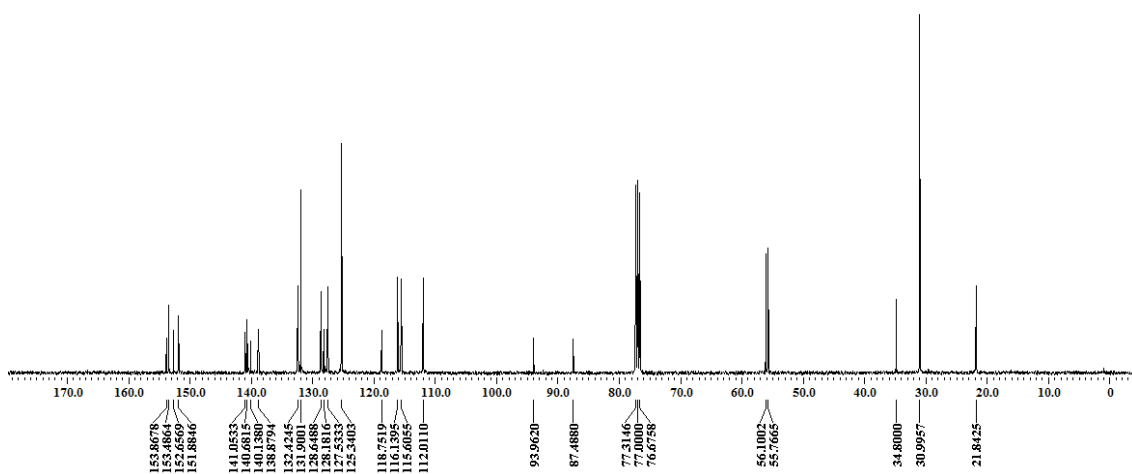

## HRMS

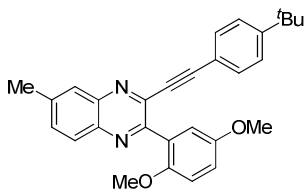

### 3-((4-(tert-Butyl)phenyl)ethynyl)-2-(2,5-dimethoxyphenyl)-6-methylquinoxaline (6d)

#### Qualitative Compound Report

|                        |              |               |                     |
|------------------------|--------------|---------------|---------------------|
| Data File              | SON-919.d    | Sample Name   | SON-919             |
| Sample Type            | Sample       | Position      | P1-B5               |
| Instrument Name        | Instrument 1 | User Name     |                     |
| Acq Method             | 29.10.2014.m | Acquired Time | 12-07-2016 15:35:03 |
| IRM Calibration Status | Success      | DA Method     | Default.m           |
| Comment                |              |               |                     |

|                |                             |       |  |
|----------------|-----------------------------|-------|--|
| Sample Group   |                             | Info. |  |
| Acquisition SW | 6200 series TOF/6500 series |       |  |
| Version        | Q-TOF B.05.01 (B5125)       |       |  |

#### Compound Table

| Compound Label                                                       | RT | Mass     | Formula                                                       | MFG Formula                                                   | MFG Diff (ppm) | DB Formula                                                    |
|----------------------------------------------------------------------|----|----------|---------------------------------------------------------------|---------------------------------------------------------------|----------------|---------------------------------------------------------------|
| Cpd 4: C <sub>29</sub> H <sub>28</sub> N <sub>2</sub> O <sub>2</sub> | 11 | 436.2158 | C <sub>29</sub> H <sub>28</sub> N <sub>2</sub> O <sub>2</sub> | C <sub>29</sub> H <sub>28</sub> N <sub>2</sub> O <sub>2</sub> | -1.55          | C <sub>29</sub> H <sub>28</sub> N <sub>2</sub> O <sub>2</sub> |

| Compound Label                                                       | m/z      | RT | Algorithm                 | Mass     |
|----------------------------------------------------------------------|----------|----|---------------------------|----------|
| Cpd 4: C <sub>29</sub> H <sub>28</sub> N <sub>2</sub> O <sub>2</sub> | 437.2229 | 11 | Find by Molecular Feature | 436.2158 |

#### MFE MS Spectrum

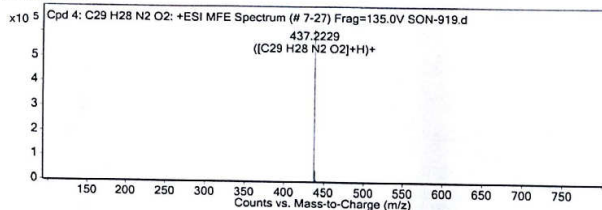

#### MFE MS Zoomed Spectrum

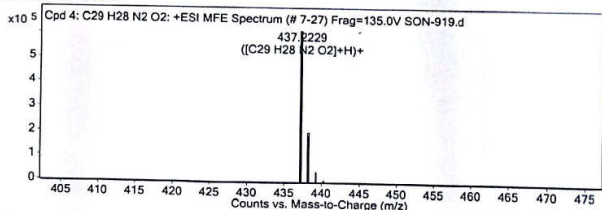

#### MS Spectrum Peak List

| m/z      | z | Abund     | Formula                                                       | Ion                |
|----------|---|-----------|---------------------------------------------------------------|--------------------|
| 437.2229 | 1 | 612949.44 | C <sub>29</sub> H <sub>28</sub> N <sub>2</sub> O <sub>2</sub> | (M+H) <sup>+</sup> |
| 438.2259 | 1 | 189387    | C <sub>29</sub> H <sub>28</sub> N <sub>2</sub> O <sub>2</sub> | (M+H) <sup>+</sup> |
| 439.2322 | 1 | 43319.19  | C <sub>29</sub> H <sub>28</sub> N <sub>2</sub> O <sub>2</sub> | (M+H) <sup>+</sup> |
| 440.2372 | 1 | 7966.13   | C <sub>29</sub> H <sub>28</sub> N <sub>2</sub> O <sub>2</sub> | (M+H) <sup>+</sup> |
| 441.2402 | 1 | 1143.29   | C <sub>29</sub> H <sub>28</sub> N <sub>2</sub> O <sub>2</sub> | (M+H) <sup>+</sup> |
| 442.2444 | 1 | 173.04    | C <sub>29</sub> H <sub>28</sub> N <sub>2</sub> O <sub>2</sub> | (M+H) <sup>+</sup> |

--- End Of Report ---

<sup>1</sup>H NMR

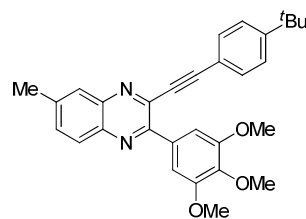

3-((4-(*tert*-Butyl)phenyl)ethynyl)-6-methyl-2-(3,4,5-trimethoxyphenyl)quinoxaline (6e)

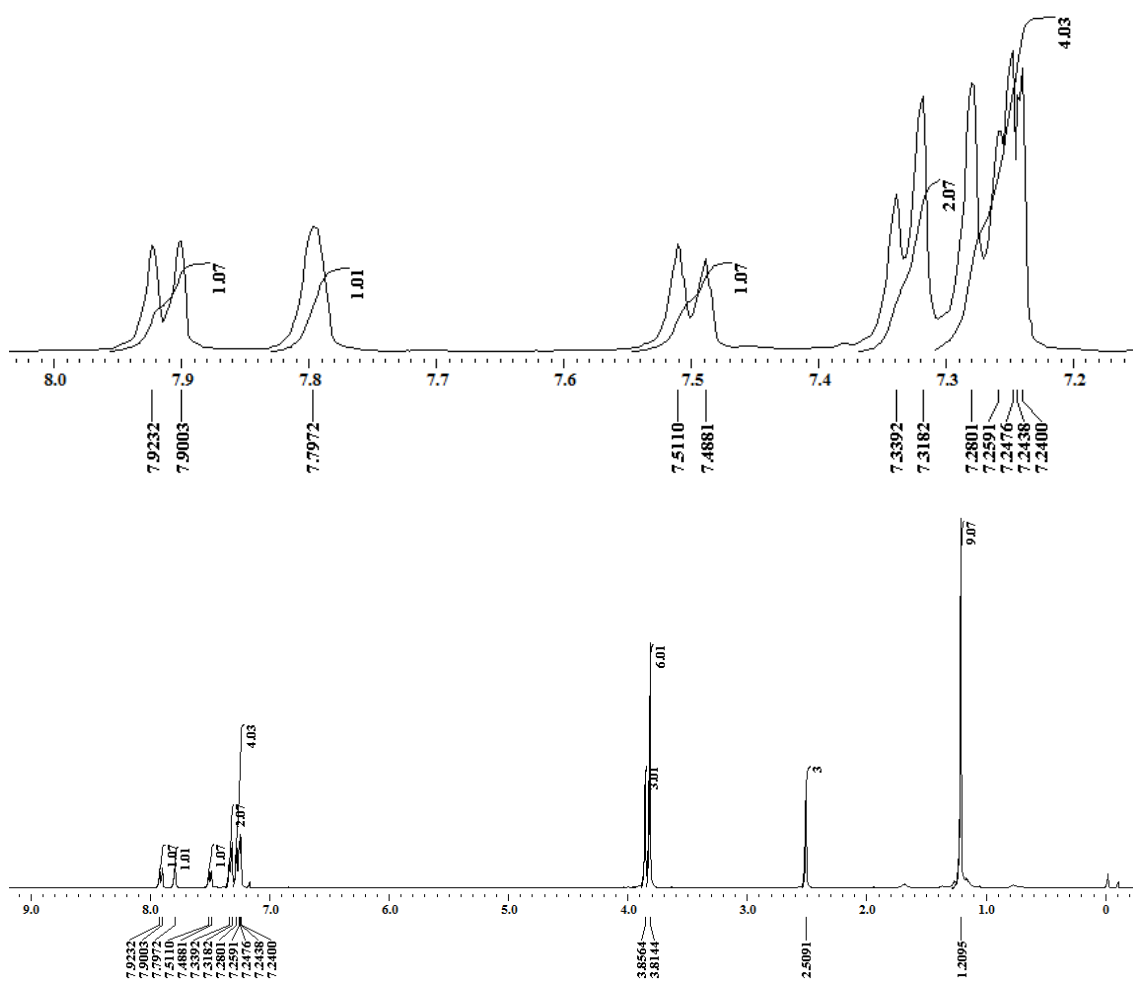

$^{13}\text{C}\{^1\text{H}\}$  NMR

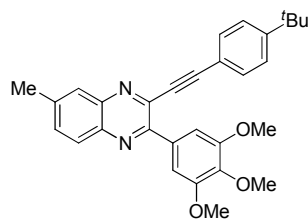

**3-((4-*tert*-Butyl)phenyl)ethynyl)-6-methyl-2-(3,4,5-trimethoxyphenyl)quinoxaline (6e)**

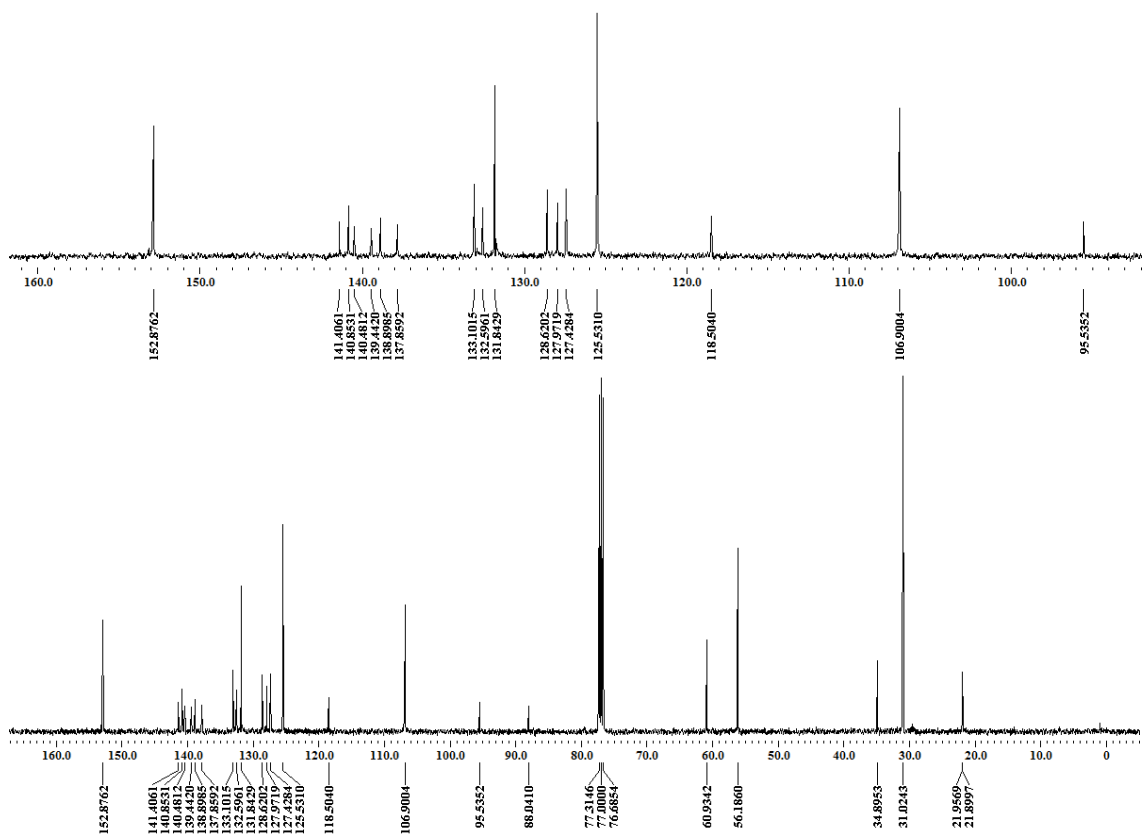



### HRMS

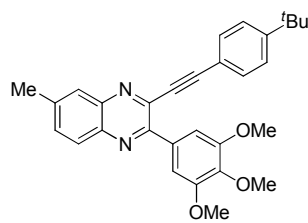

### 3-((4-*tert*-Butyl)phenyl)ethynyl)-6-methyl-2-(3,4,5-trimethoxyphenyl)quinoxaline (6e)

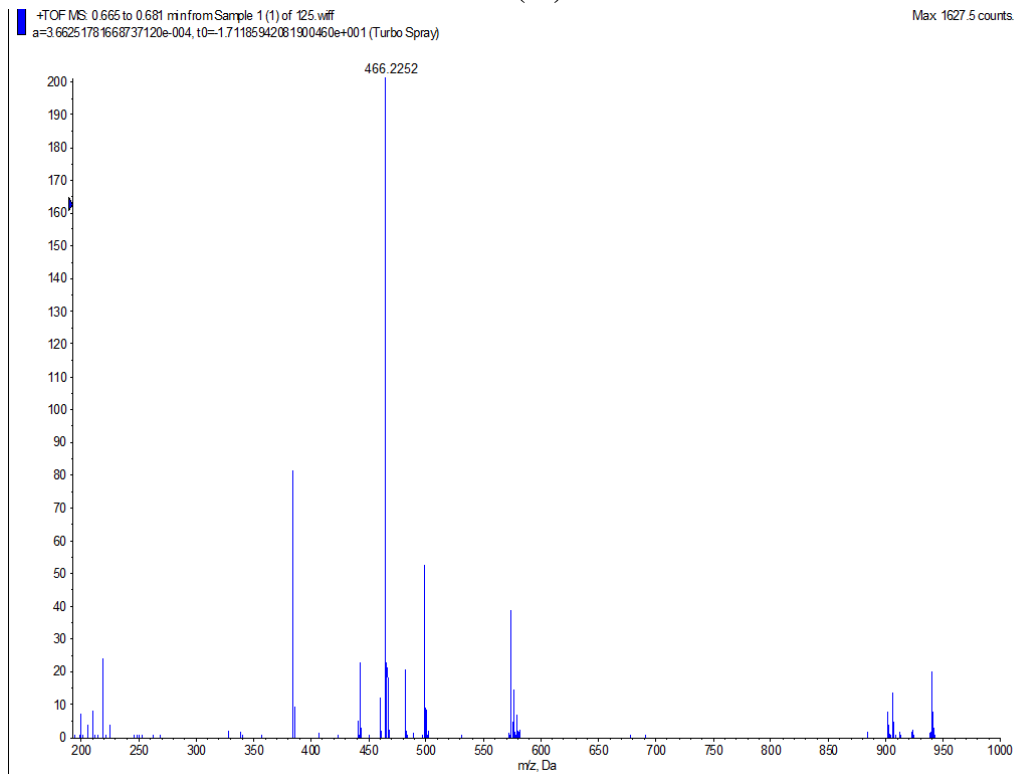

# <sup>1</sup>H NMR

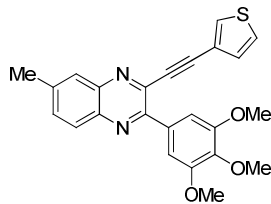

**6-Methyl-3-(thiophen-3-ylethynyl)-2-(3,4,5-trimethoxyphenyl)quinoxaline (6f)**

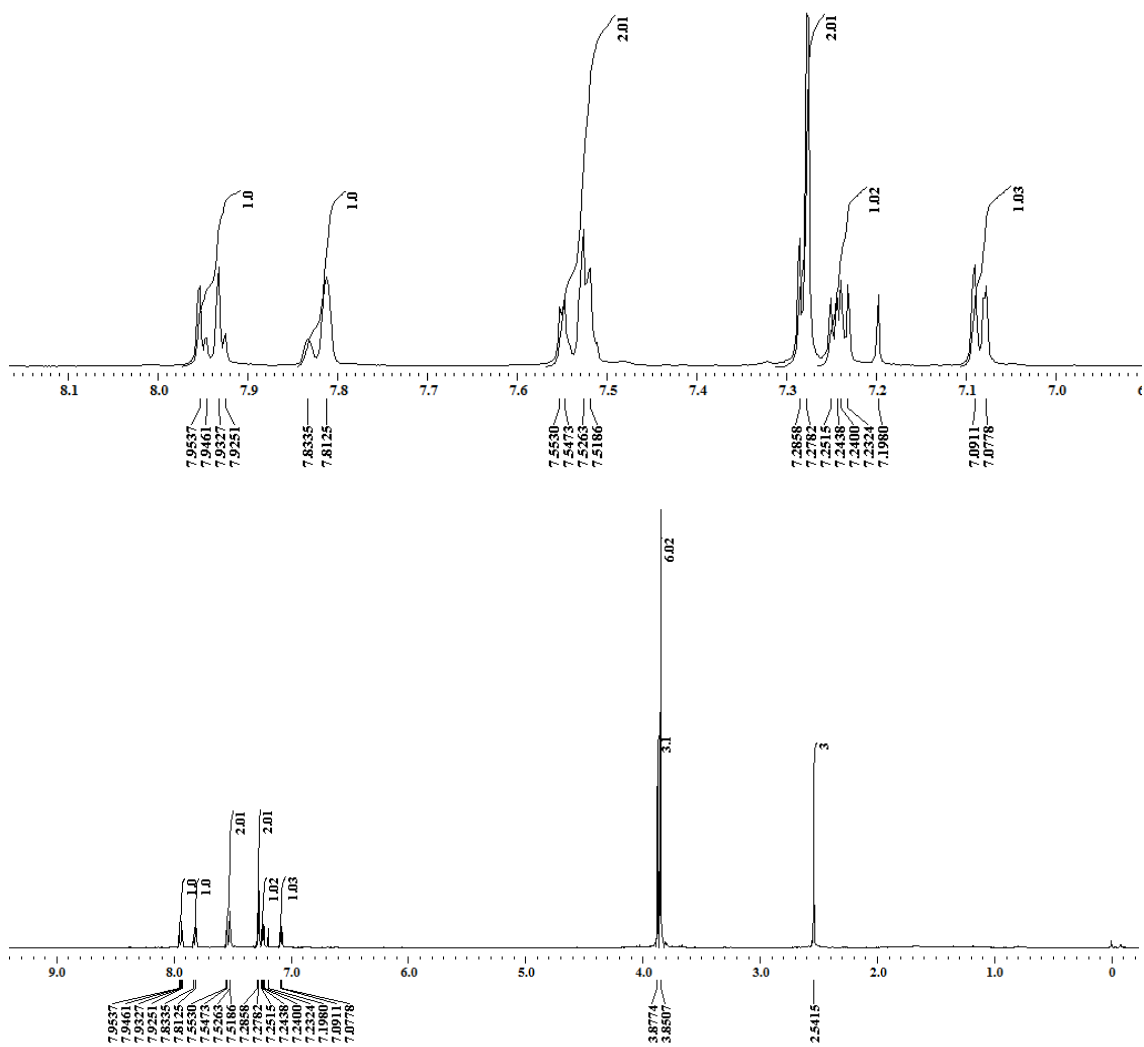

$^{13}\text{C}\{^1\text{H}\}$  NMR

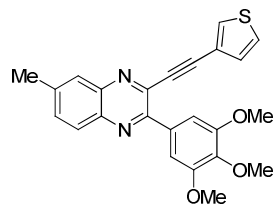

**6-Methyl-3-(thiophen-3-ylethynyl)-2-(3,4,5-trimethoxyphenyl)quinoxaline (6f)**

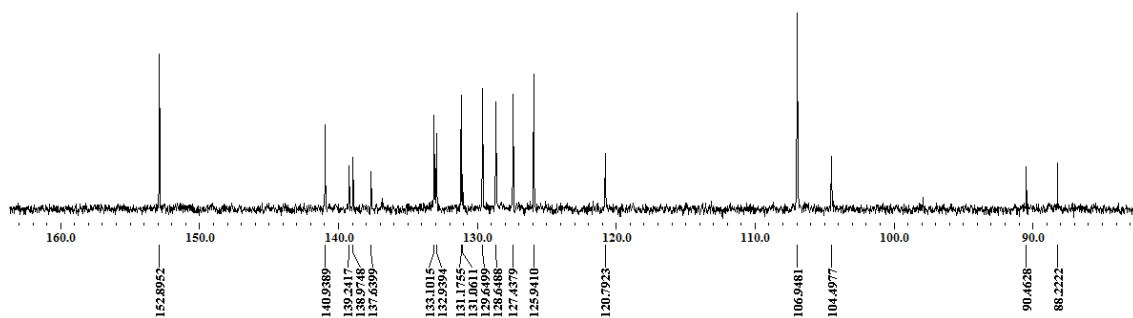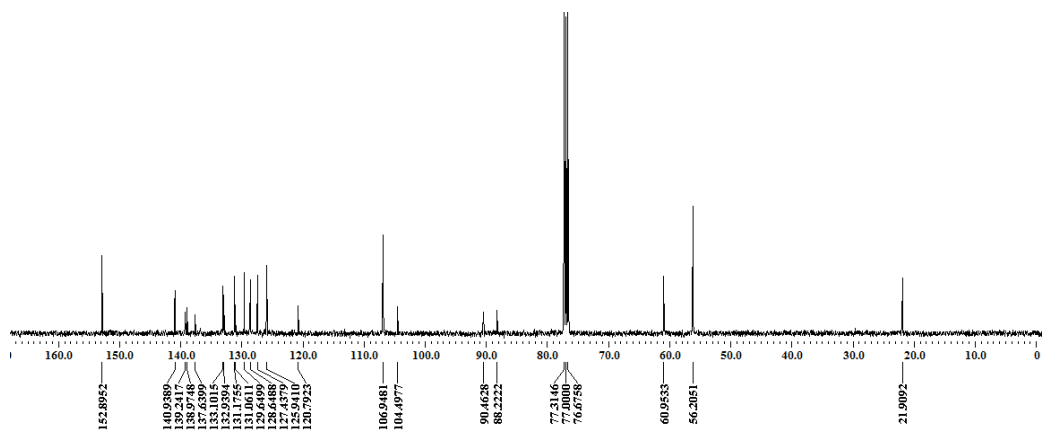

## HRMS

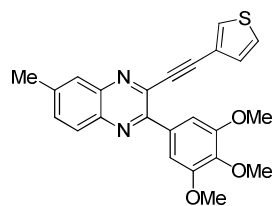

**6-Methyl-3-(thiophen-3-ylethynyl)-2-(3,4,5-trimethoxyphenyl)quinoxaline (6f)**

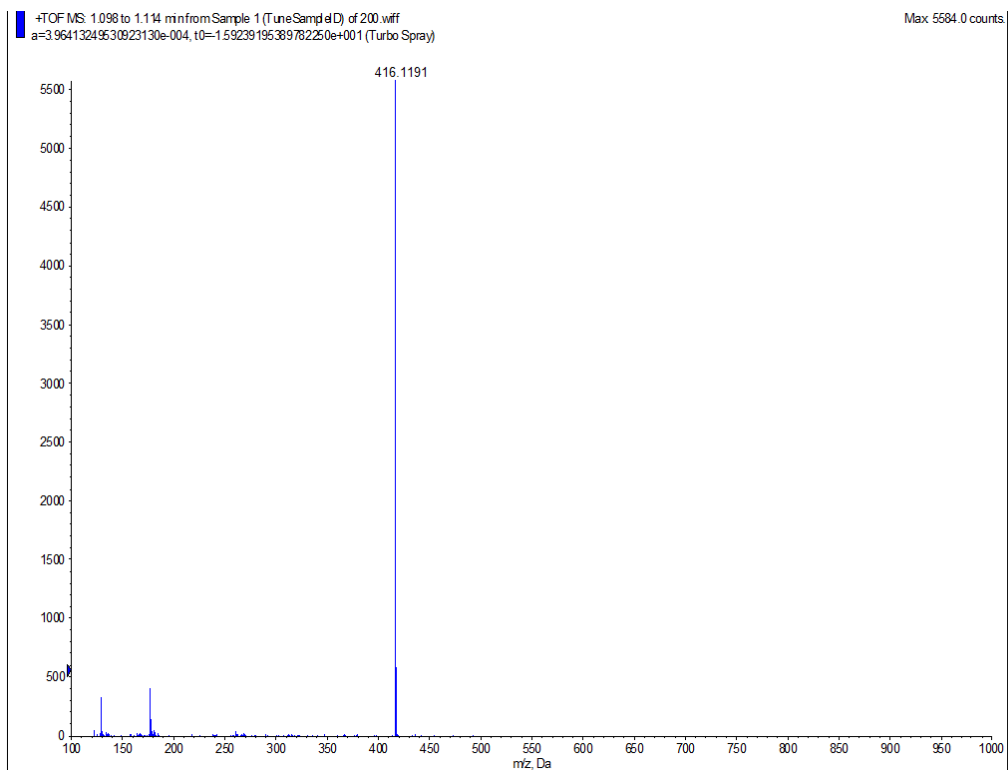

# <sup>1</sup>H NMR

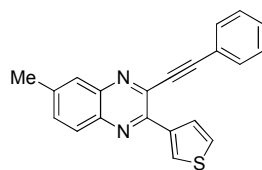

**6-Methyl-3-(phenylethynyl)-2-(thiophen-3-yl)quinoxaline  
(6g)**

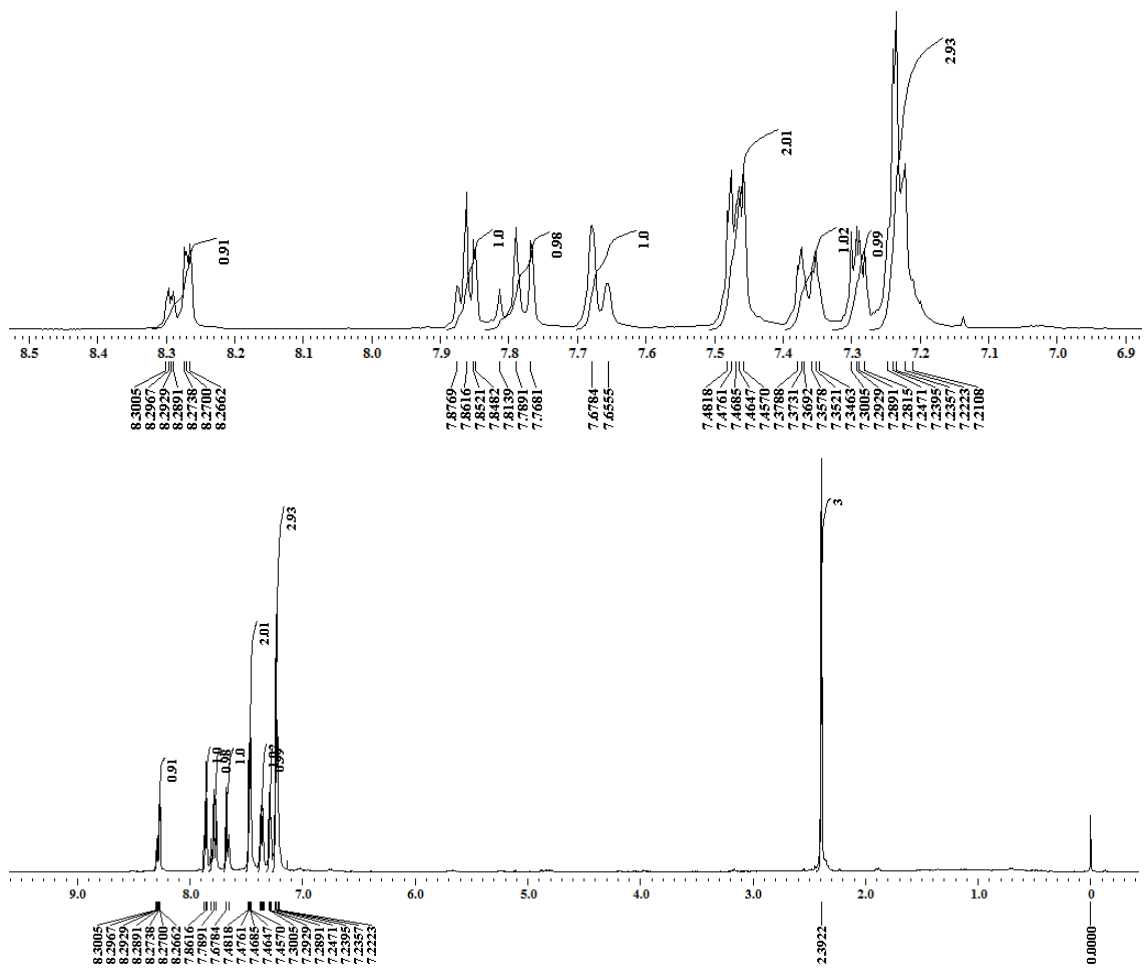

$^{13}\text{C}\{^1\text{H}\}$  NMR



**6-Methyl-3-(phenylethynyl)-2-(thiophen-3-yl)quinoxaline  
(6g)**

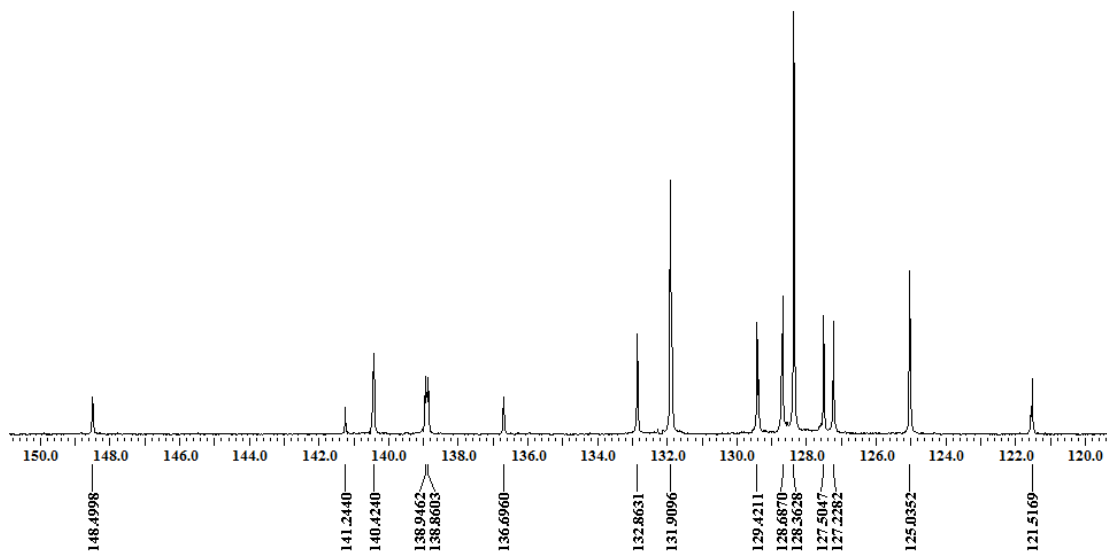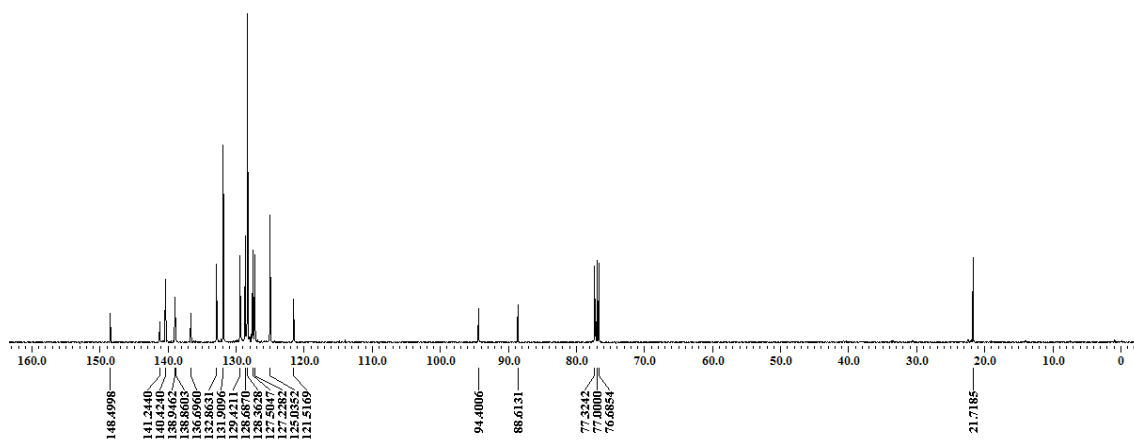

# HRMS

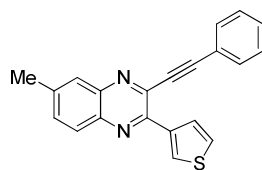

**6-Methyl-3-(phenylethynyl)-2-(thiophen-3-yl)quinoxaline  
(6g)**

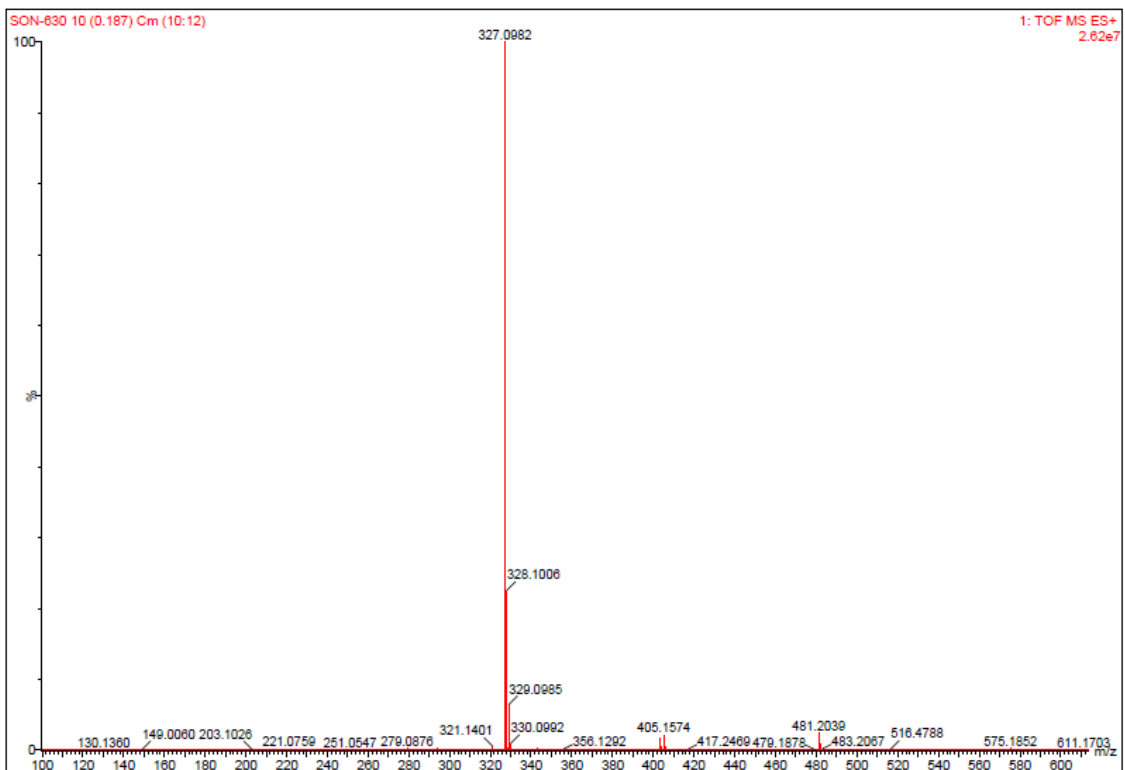

# <sup>1</sup>H NMR

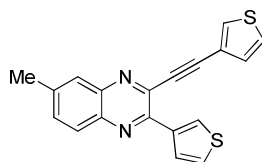

6-Methyl-2-(thiophen-3-yl)-3-(thiophen-3-ylethynyl)quinoxaline (6i)

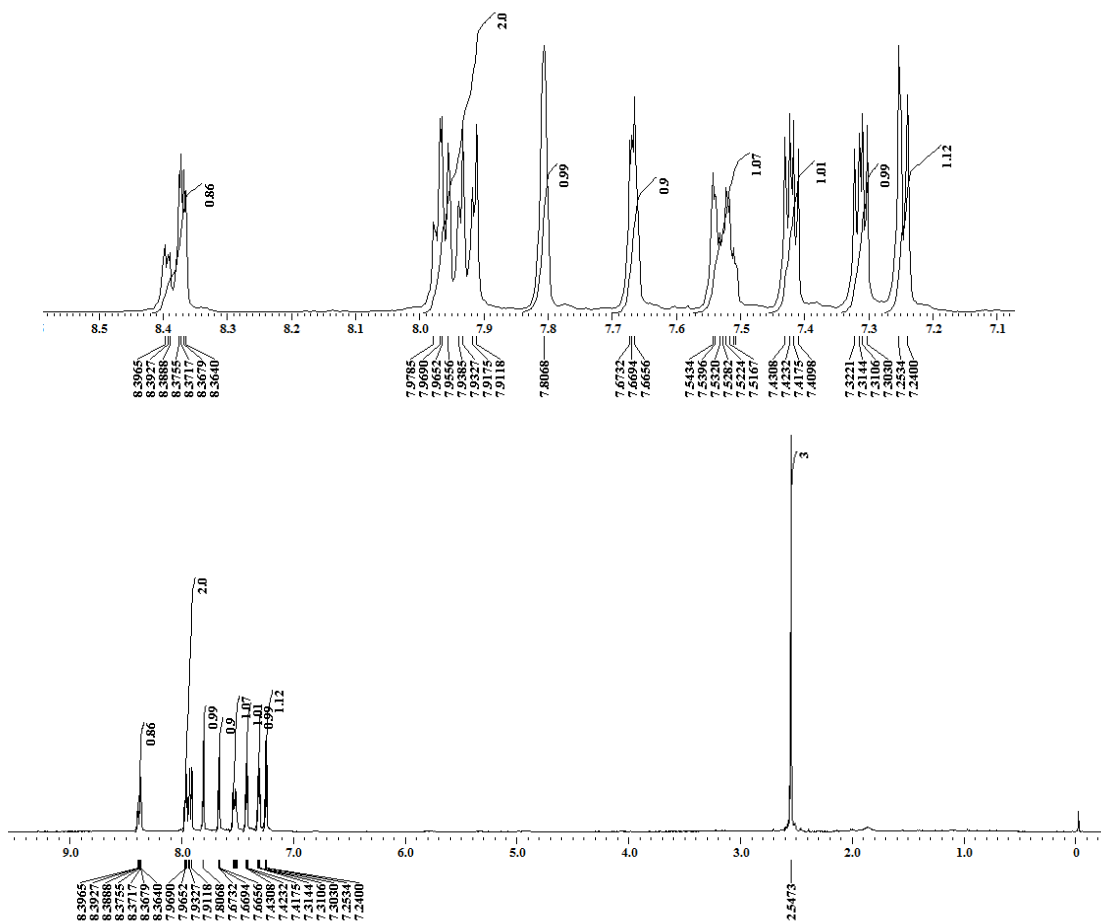



$^{13}\text{C}\{^1\text{H}\}$  NMR

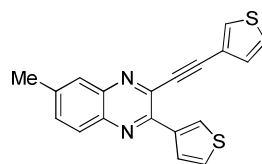

6-Methyl-2-(thiophen-3-yl)-3-(thiophen-3-ylethynyl)quinoxaline (6i)

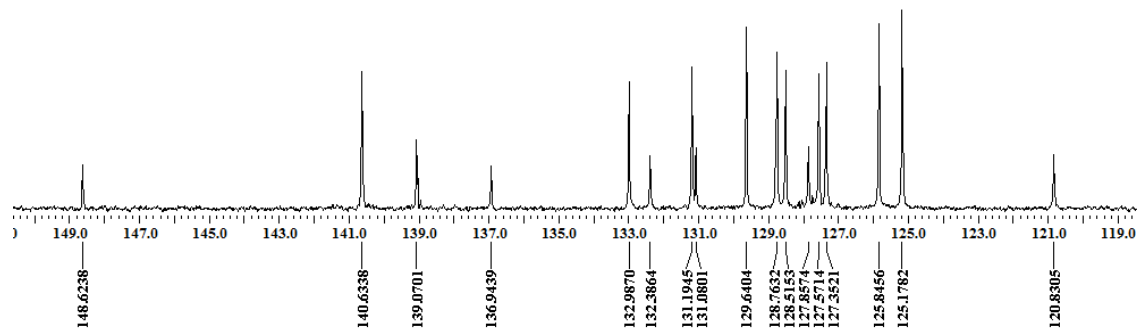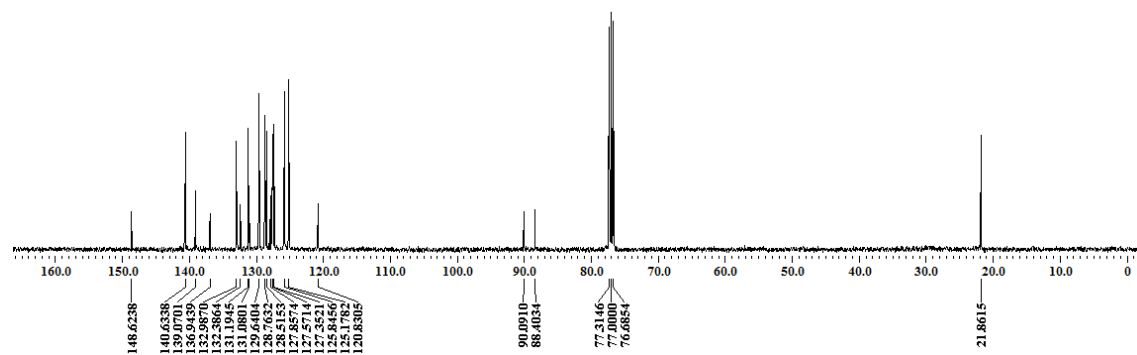

## HRMS

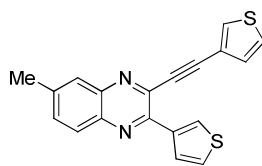

### 6-Methyl-2-(thiophen-3-yl)-3-(thiophen-3-ylethynyl)quinoxaline (6i)

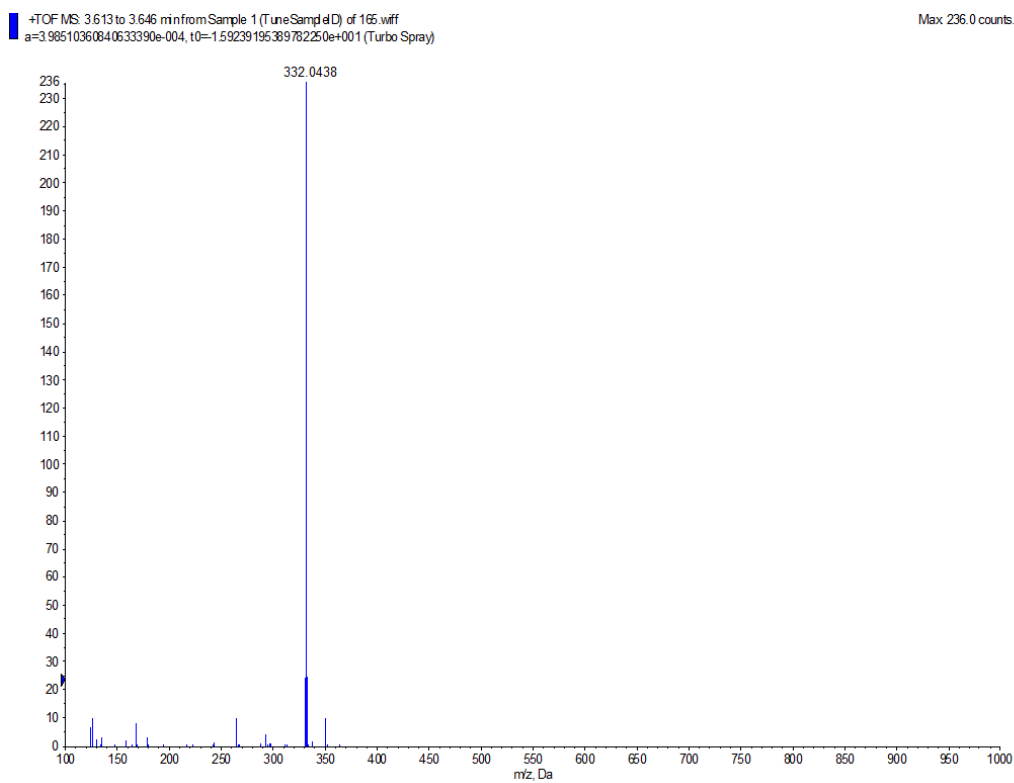

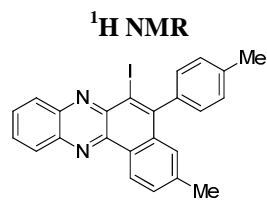

**6-Iodo-3-methyl-5-(*p*-tolyl)benzo[*a*]phenazine (5a)**

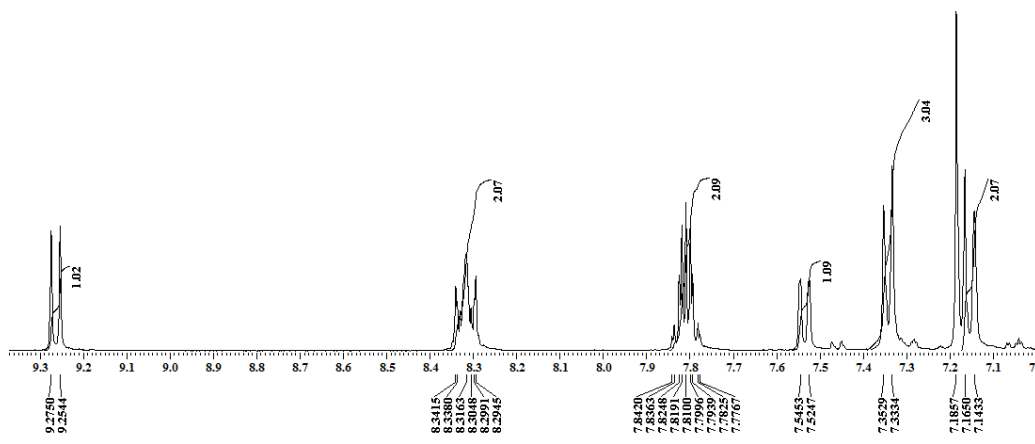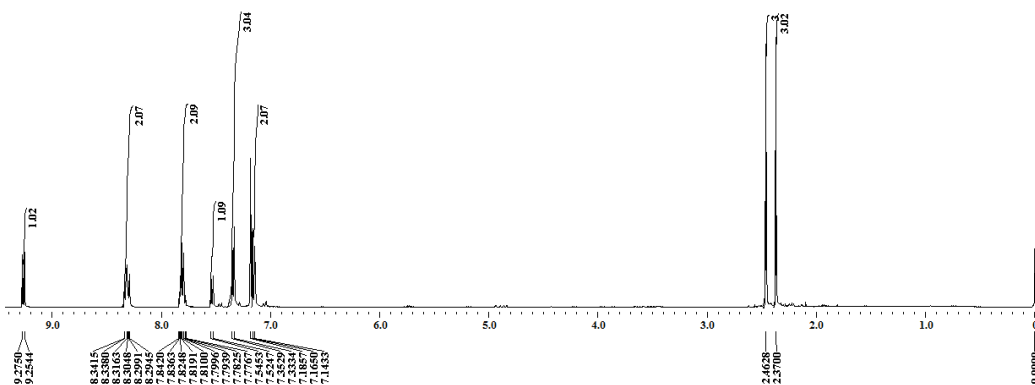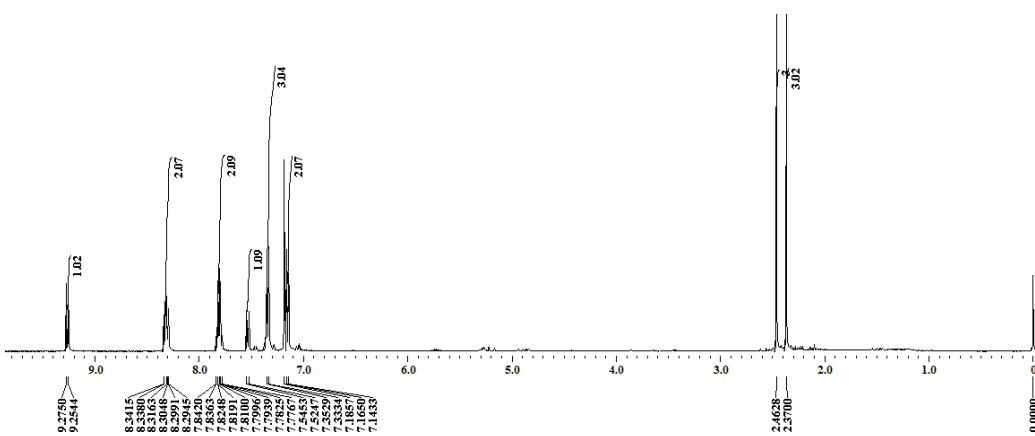

$^{13}\text{C}\{^1\text{H}\}$  NMR

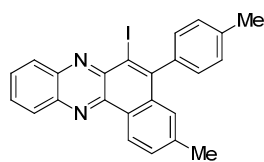

**6-Iodo-3-methyl-5-(*p*-tolyl)benzo[*a*]phenazine (5a)**

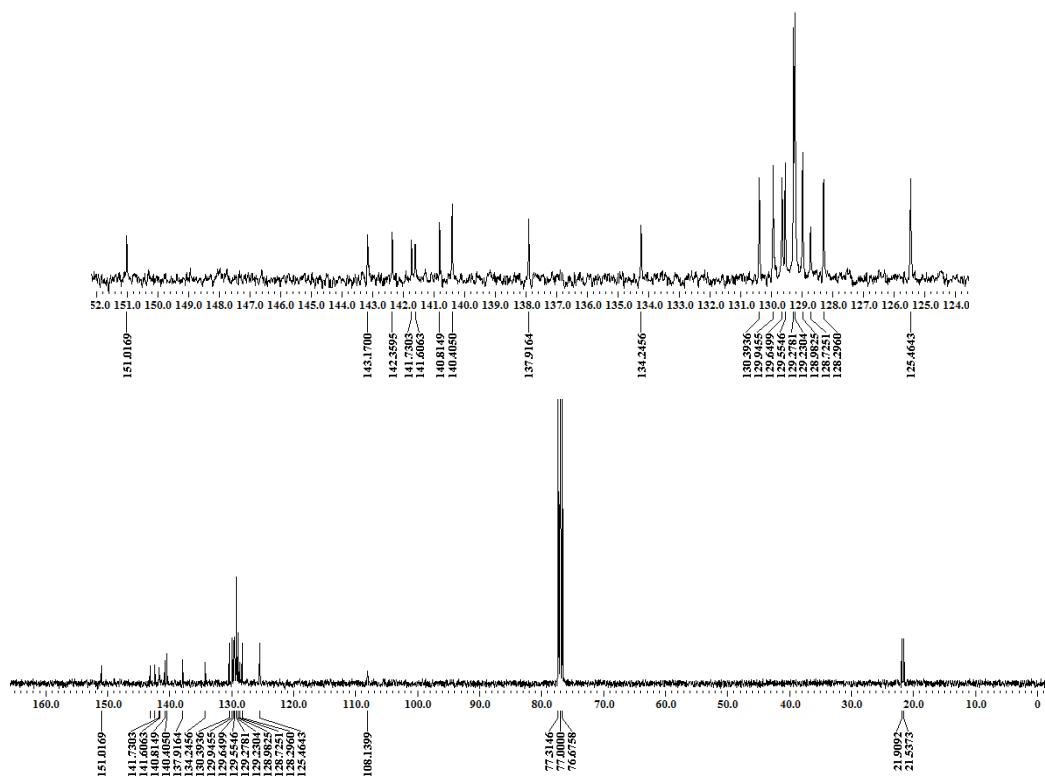

# HRMS

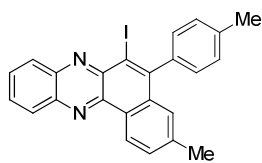

**6-Iodo-3-methyl-5-(*p*-tolyl)benzo[*a*]phenazine (5a)**

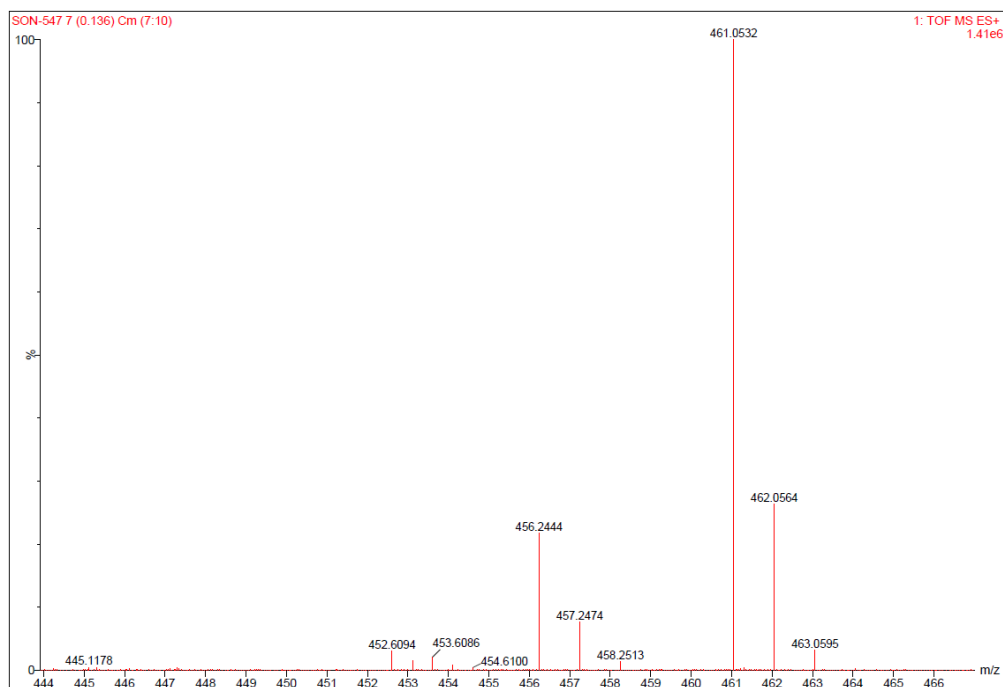

<sup>1</sup>H NMR

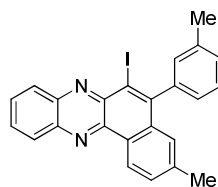

6-Iodo-3-methyl-5-(*m*-tolyl)benzo[*a*]phenazine (5b)

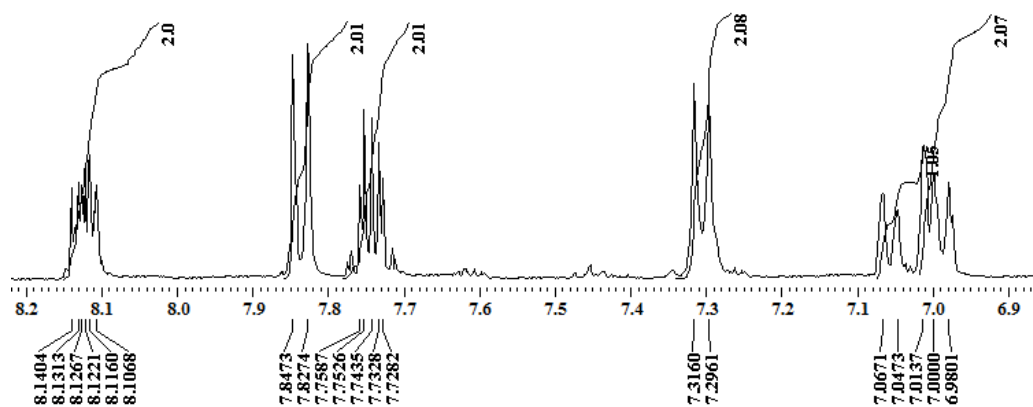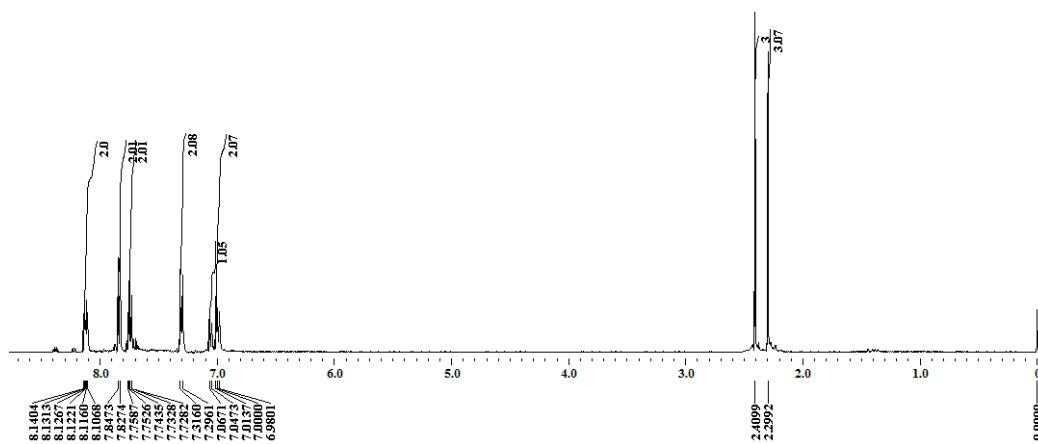

$^{13}\text{C}\{^1\text{H}\}$  NMR

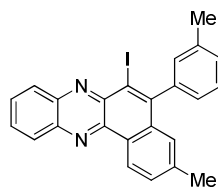

**6-Iodo-3-methyl-5-(*m*-tolyl)benzo[*a*]phenazine (5b)**

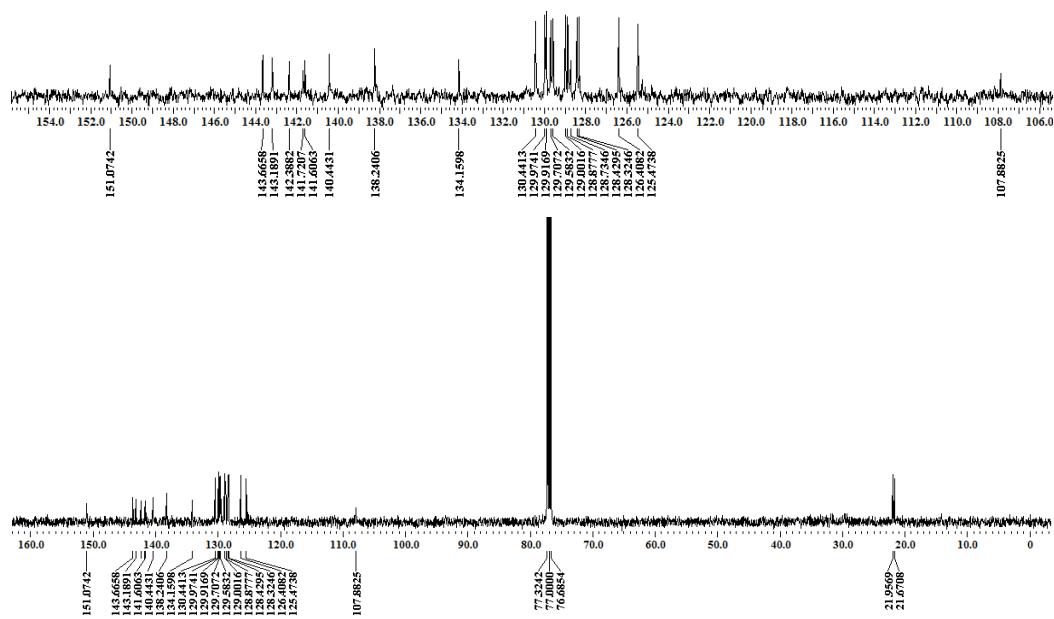

# HRMS

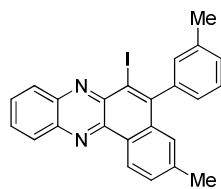

**6-Iodo-3-methyl-5-(*m*-tolyl)benzo[*a*]phenazine (5b)**

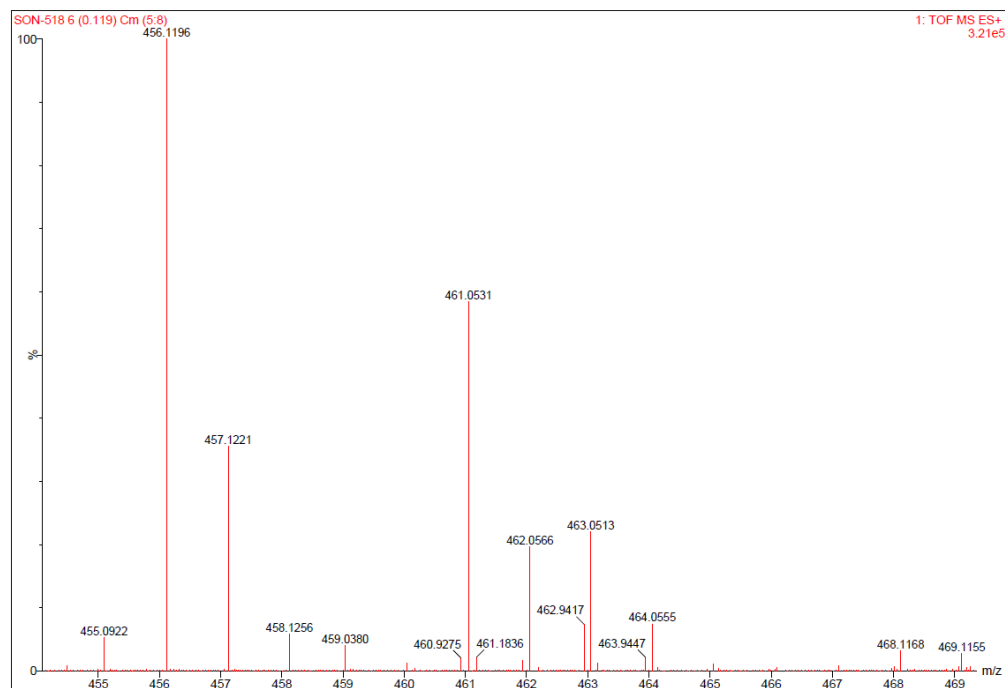



# <sup>1</sup>H NMR

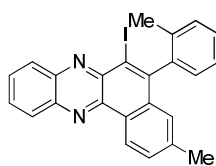

6-Iodo-3-methyl-5-(*o*-tolyl)benzo[*a*]phenazine (5c)

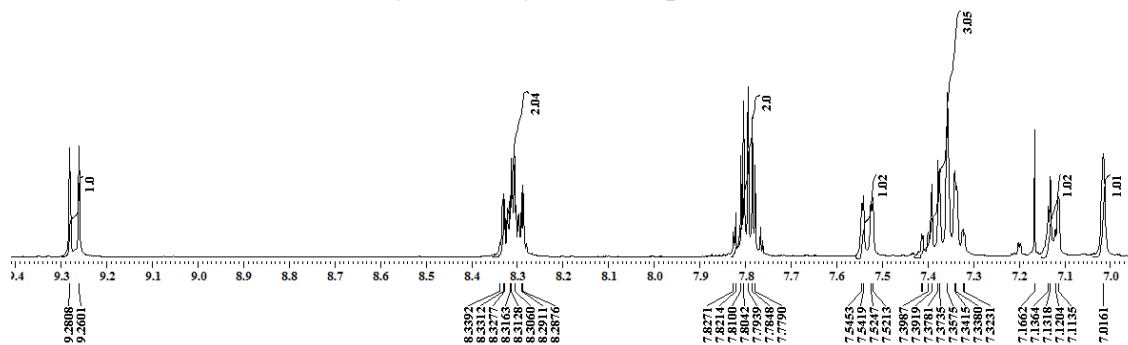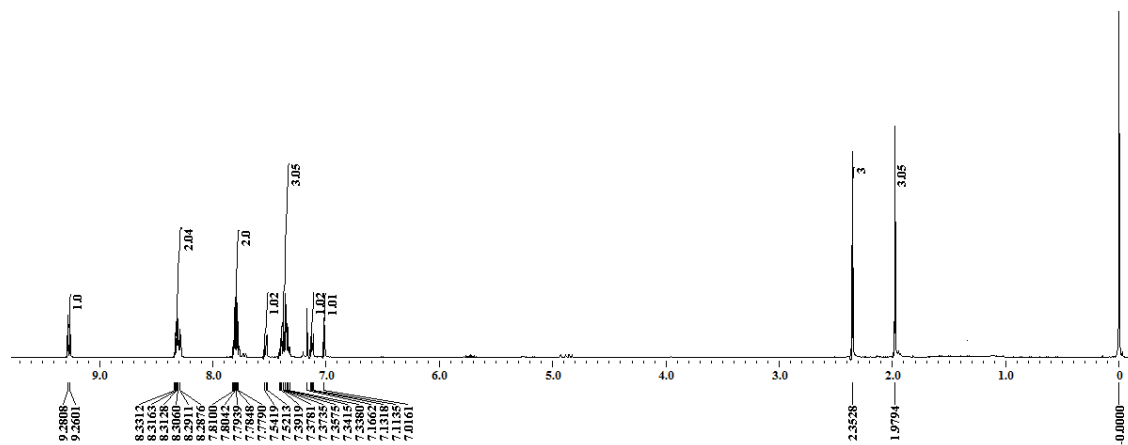

$^{13}\text{C}\{^1\text{H}\}$  NMR



6-Iodo-3-methyl-5-(*o*-tolyl)benzo[*a*]phenazine (5c)

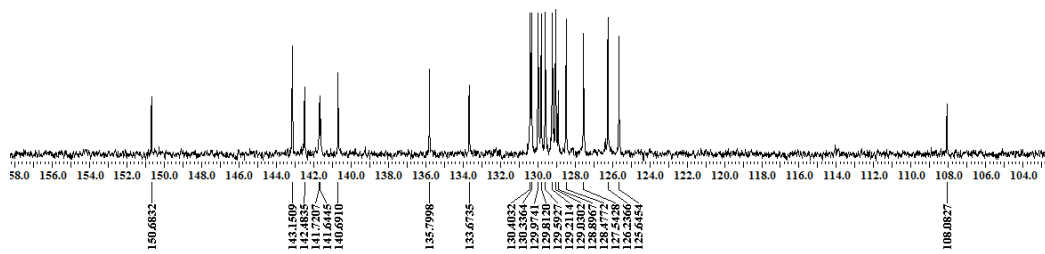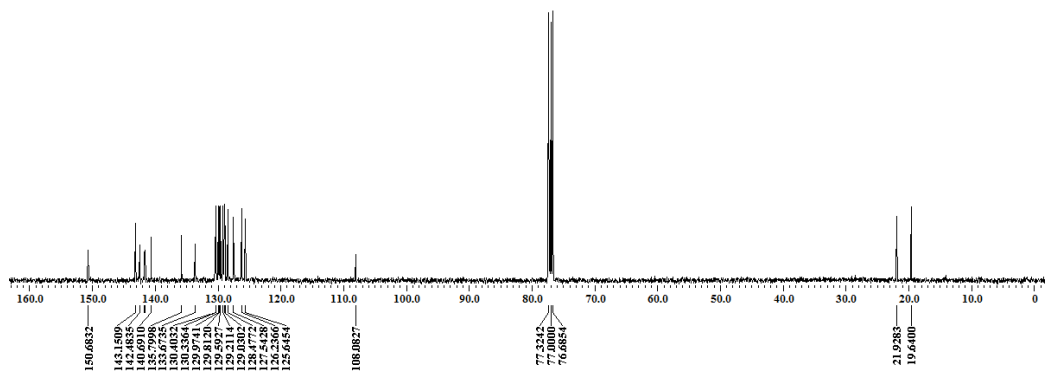

# HRMS

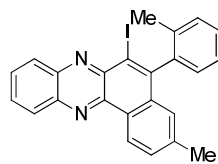

**6-Iodo-3-methyl-5-(*o*-tolyl)benzo[*a*]phenazine (5c)**

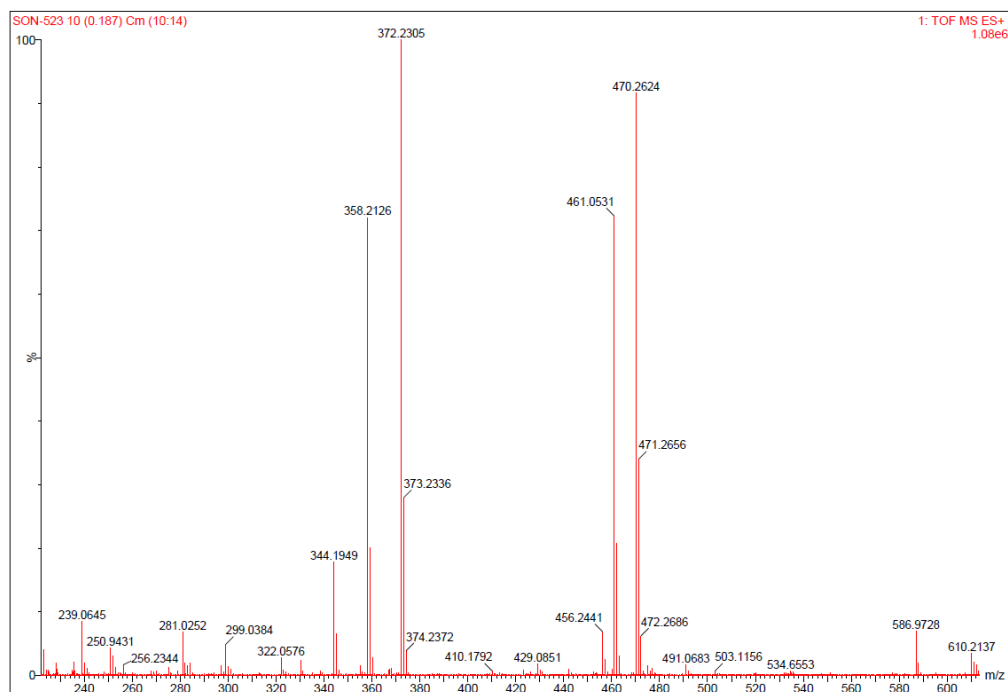

<sup>1</sup>H NMR

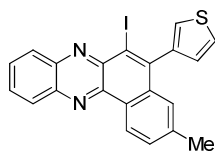

6-Iodo-3-methyl-5-(thiophen-3-yl)benzo[*a*]phenazine (5d)

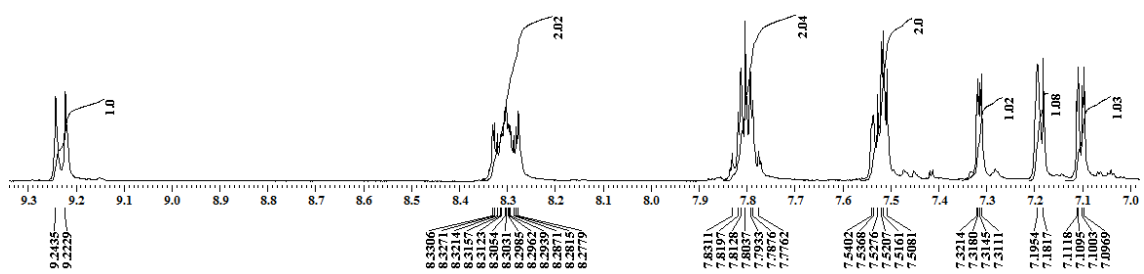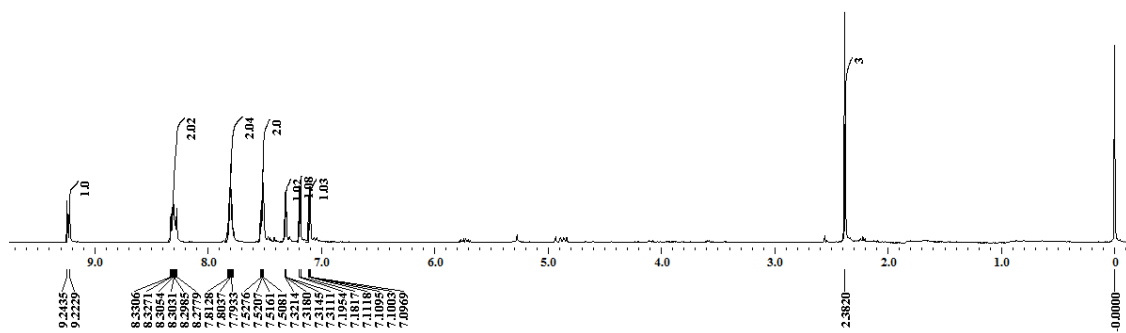

$^{13}\text{C}\{^1\text{H}\}$  NMR

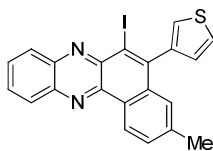

6-Iodo-3-methyl-5-(thiophen-3-yl)benzo[*a*]phenazine (5d)

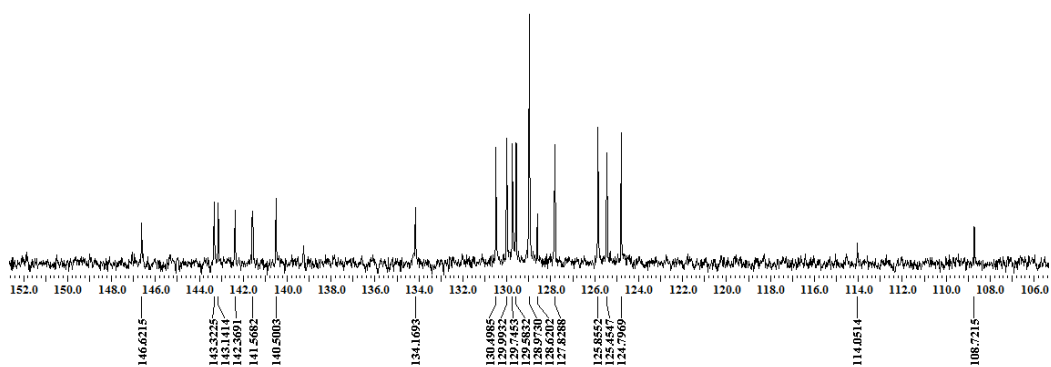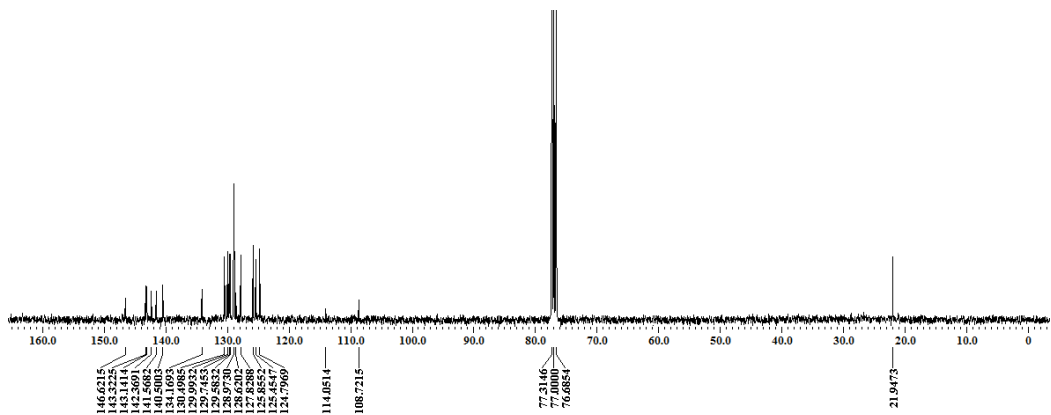

# HRMS

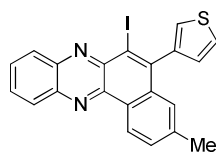

**6-Iodo-3-methyl-5-(thiophen-3-yl)benzo[a]phenazine (5d)**

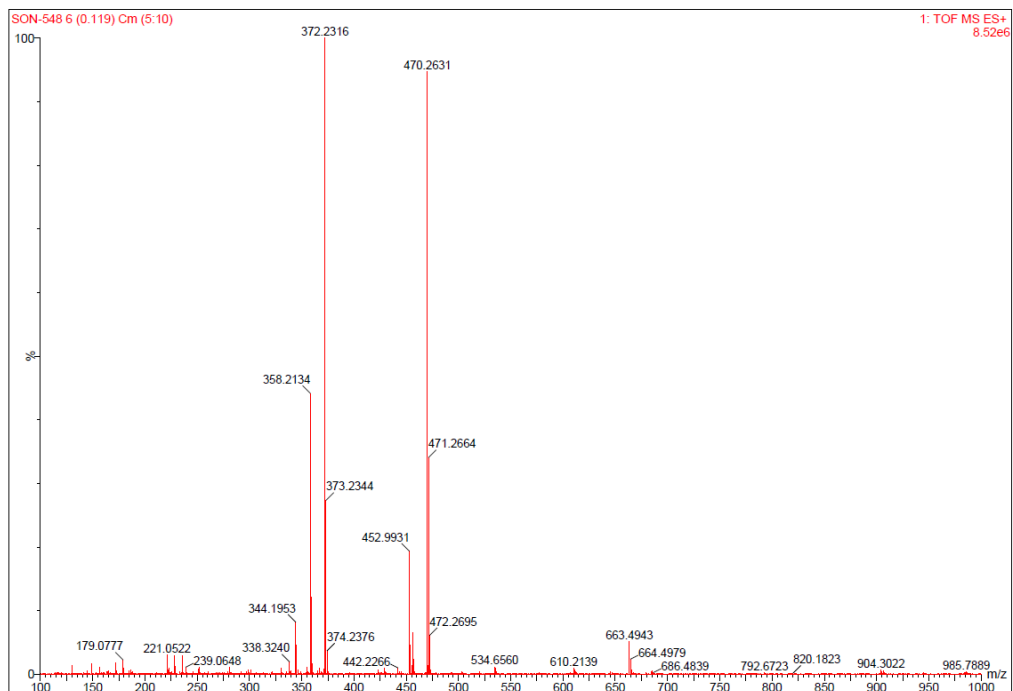

# <sup>1</sup>H NMR

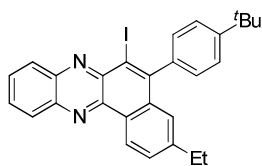

5-(4-(*tert*-Butyl)phenyl)-3-ethyl-6-iodobenzo[*a*]phenazine (5e)

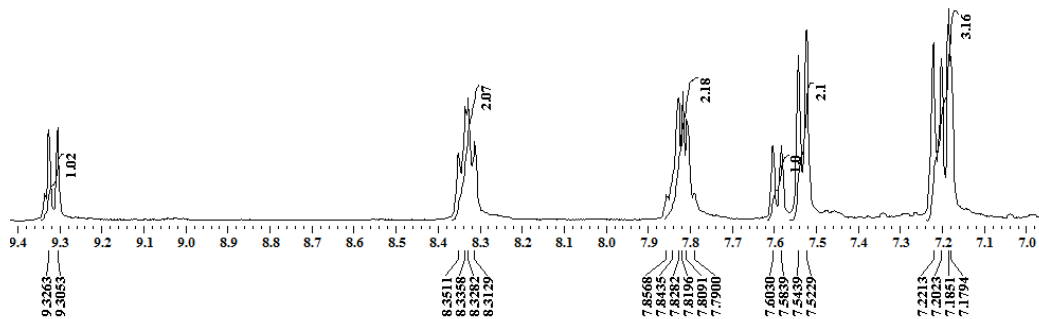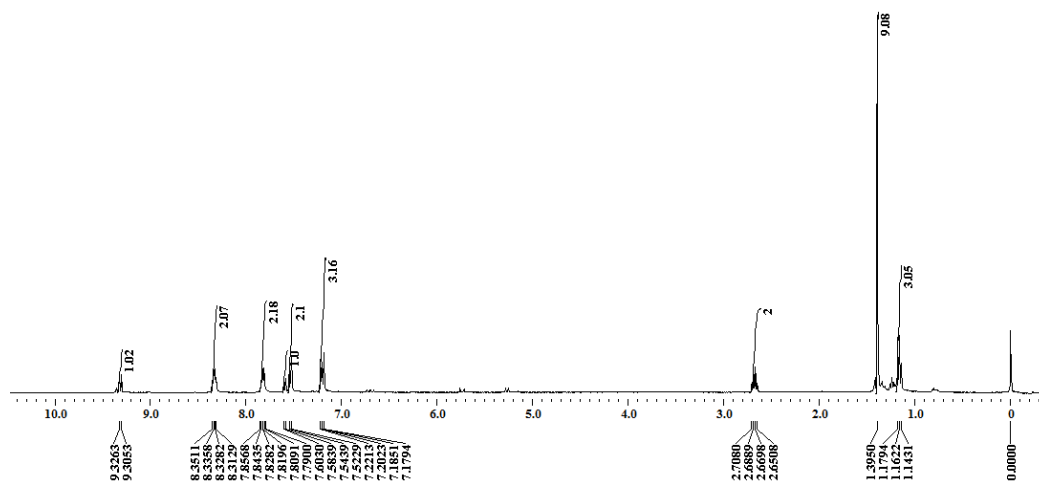

$^{13}\text{C}\{^1\text{H}\}$  NMR

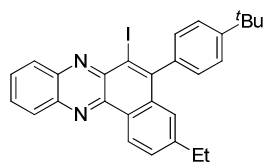

5-(4-(*tert*-Butyl)phenyl)-3-ethyl-6-iodobenzotriazine (5e)

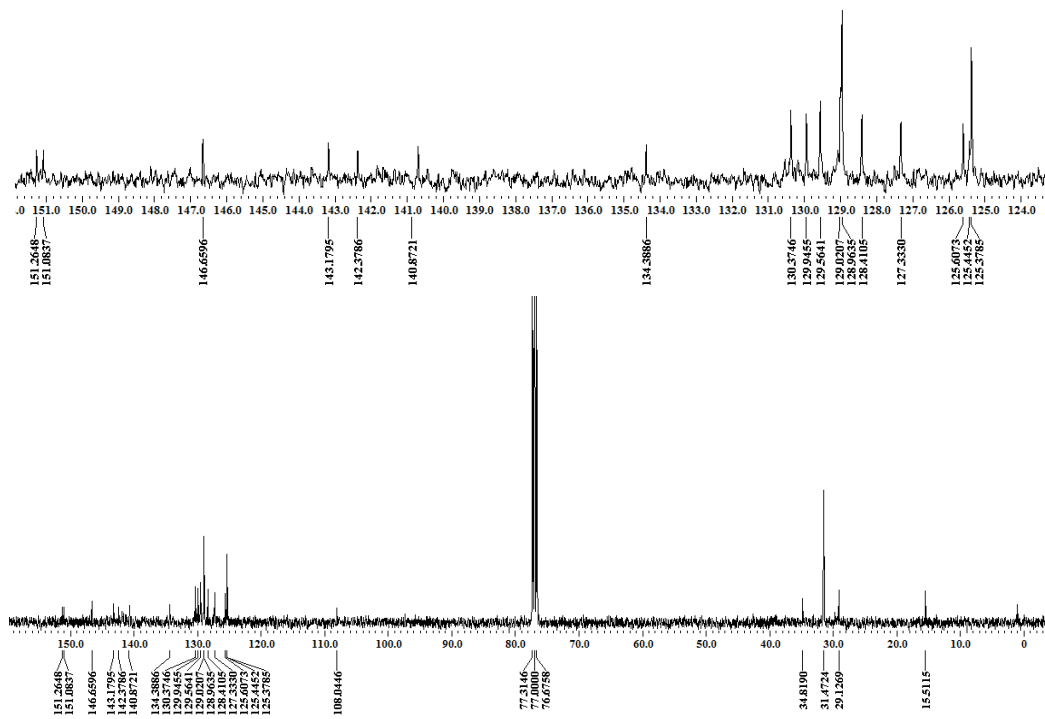



## HRMS

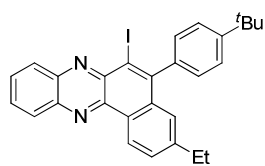

**5-(4-(*tert*-Butyl)phenyl)-3-ethyl-6-iodobenzo[*a*]phenazine (5e)**

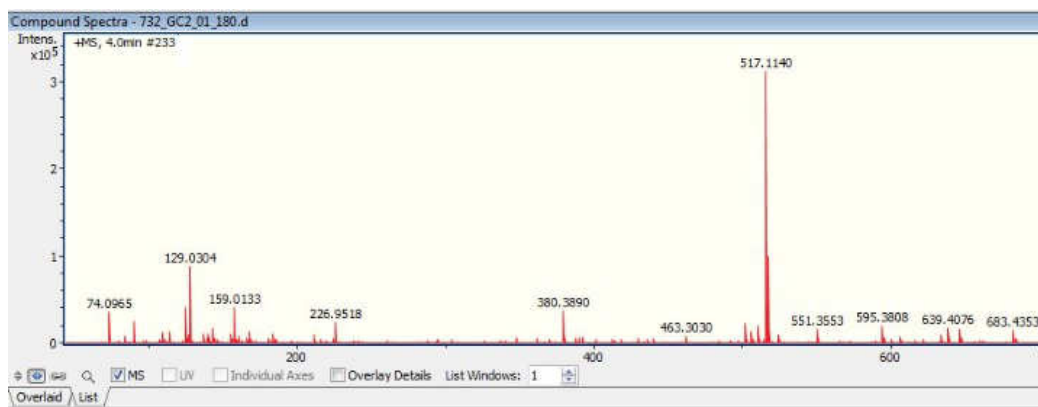

<sup>1</sup>H NMR

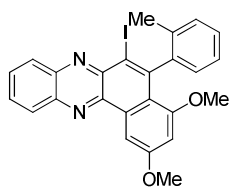

6-Iodo-2,4-dimethoxy-5-(*o*-tolyl)benzo[*a*]phenazine (5f)

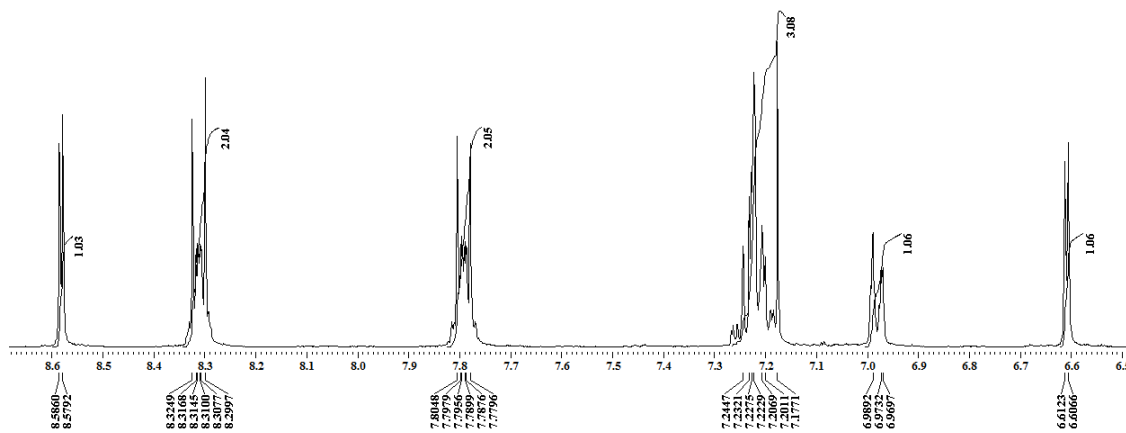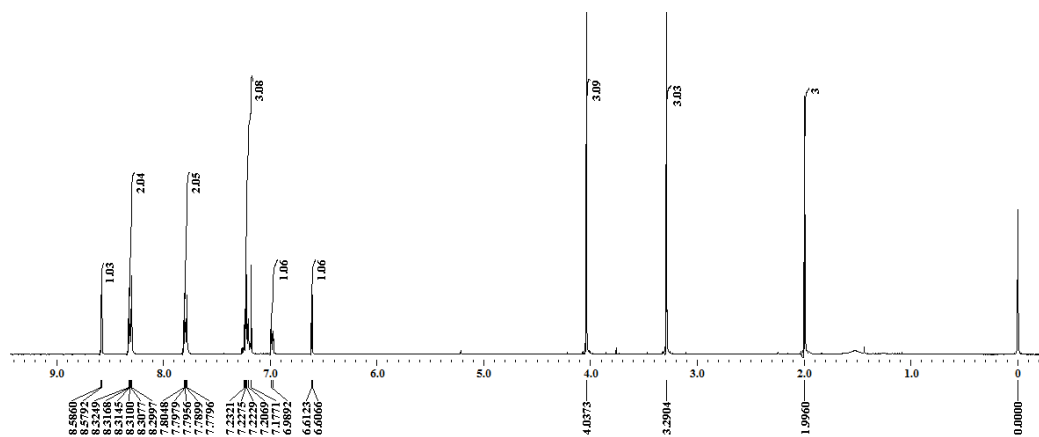

$^{13}\text{C}\{^1\text{H}\}$  NMR

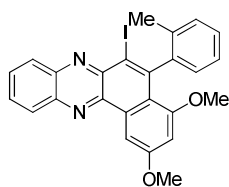

6-Iodo-2,4-dimethoxy-5-(*o*-tolyl)benzo[*a*]phenazine (5f)

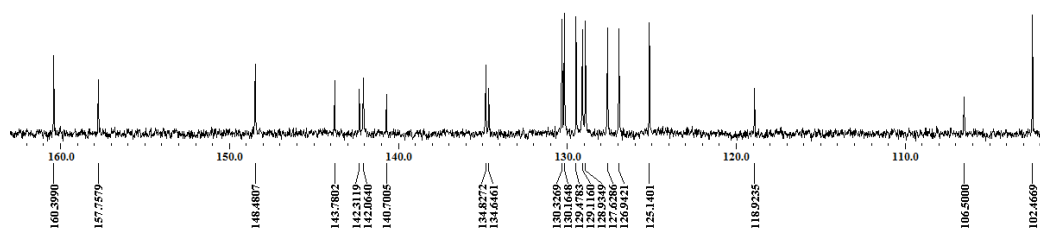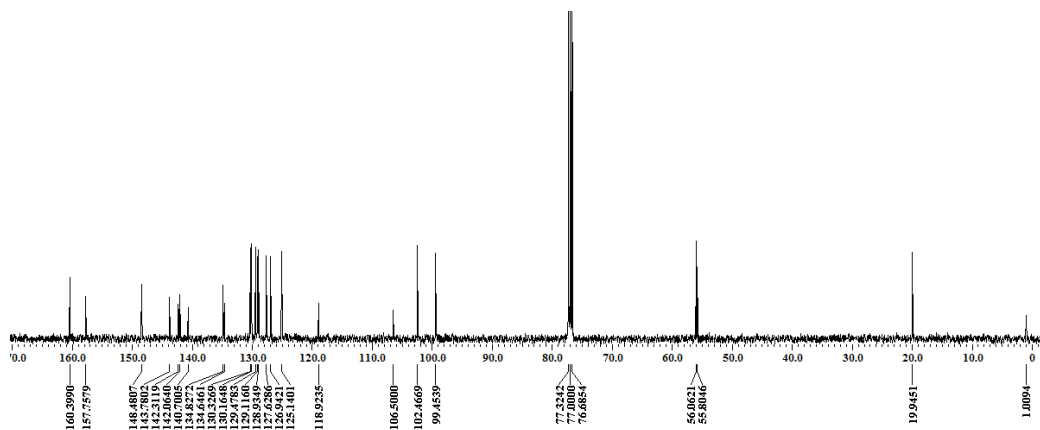

# HRMS

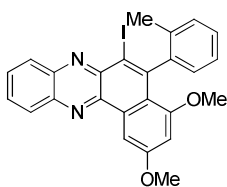

**6-Iodo-2,4-dimethoxy-5-(o-tolyl)benzo[a]phenazine (5f)**

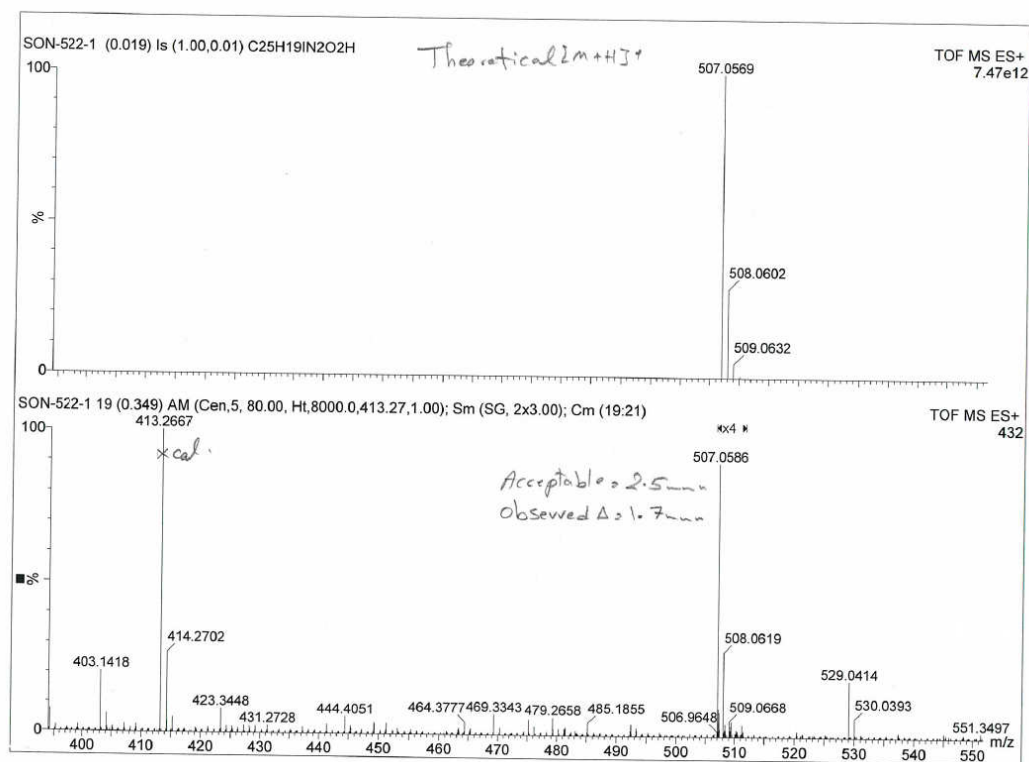

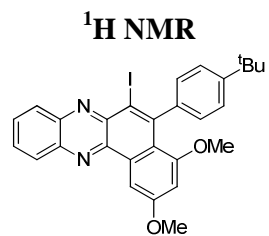

**5-(4-(*tert*-Butyl)phenyl)-6-iodo-2,4-dimethoxybenzo[*a*]phenazine (5g)**

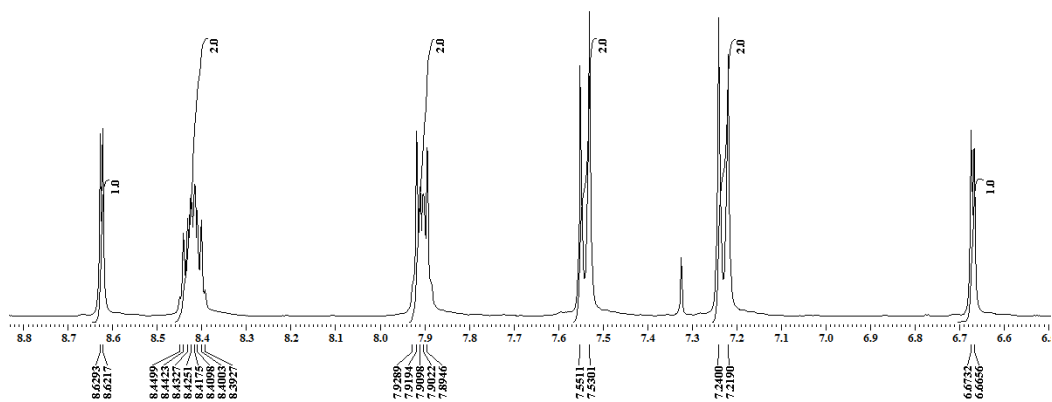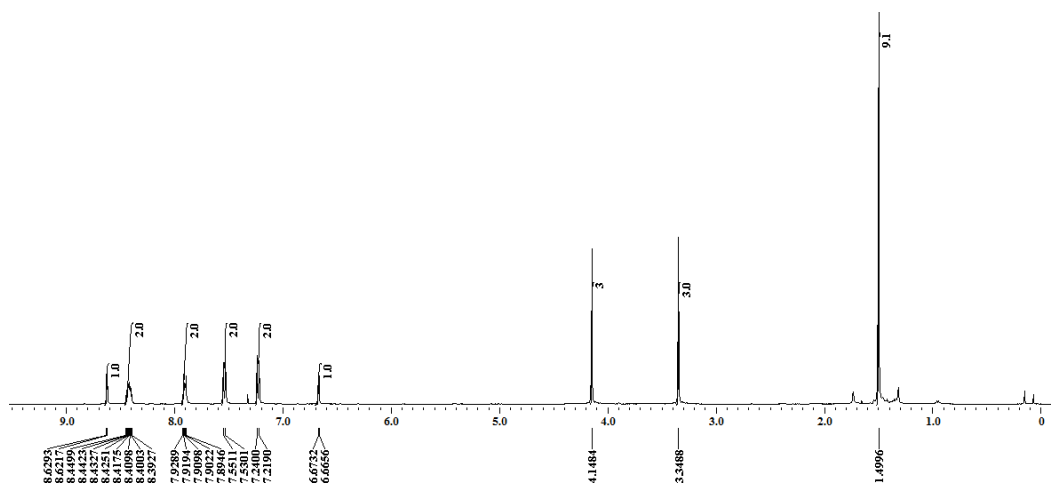

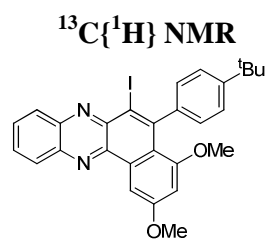

**5-(4-(*tert*-Butyl)phenyl)-6-iodo-2,4-dimethoxybenzo[*a*]phenazine (5g)**

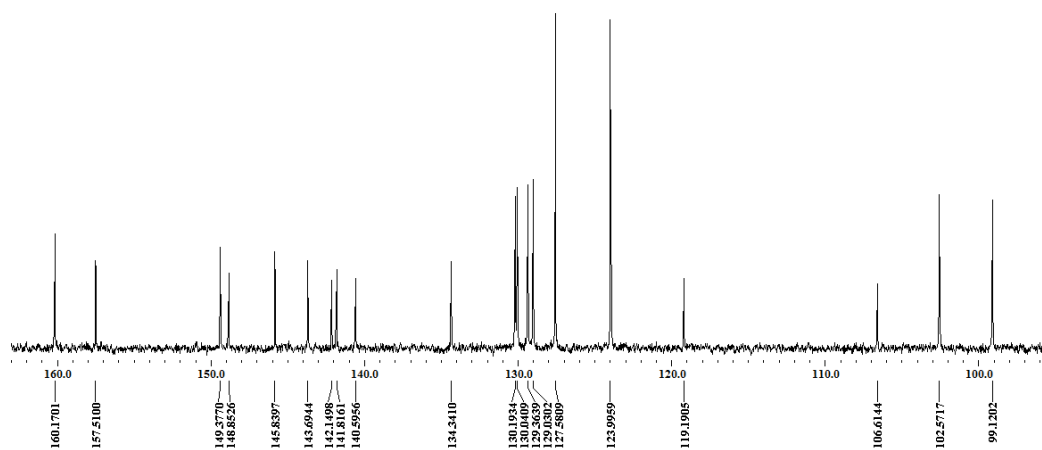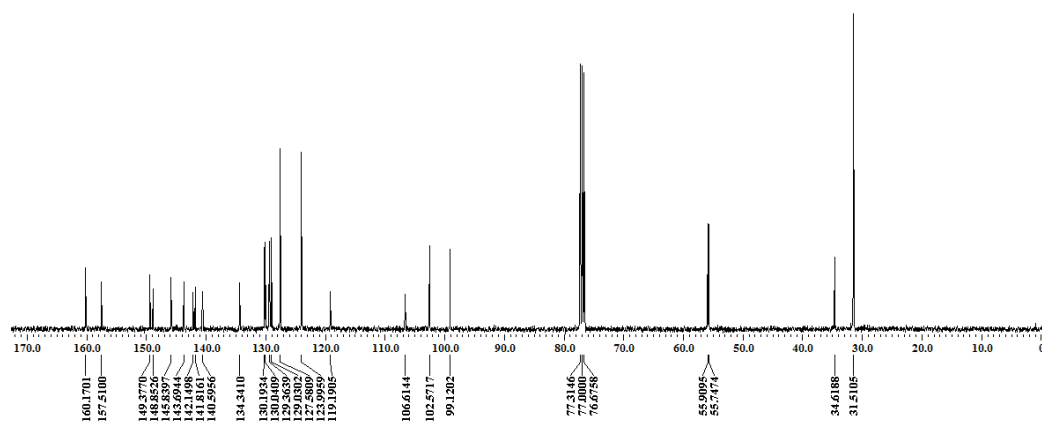

### HRMS

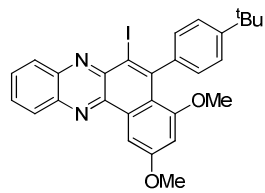

**5-(4-(*tert*-Butyl)phenyl)-6-iodo-2,4-dimethoxybenzo[*a*]phenazine (5g)**

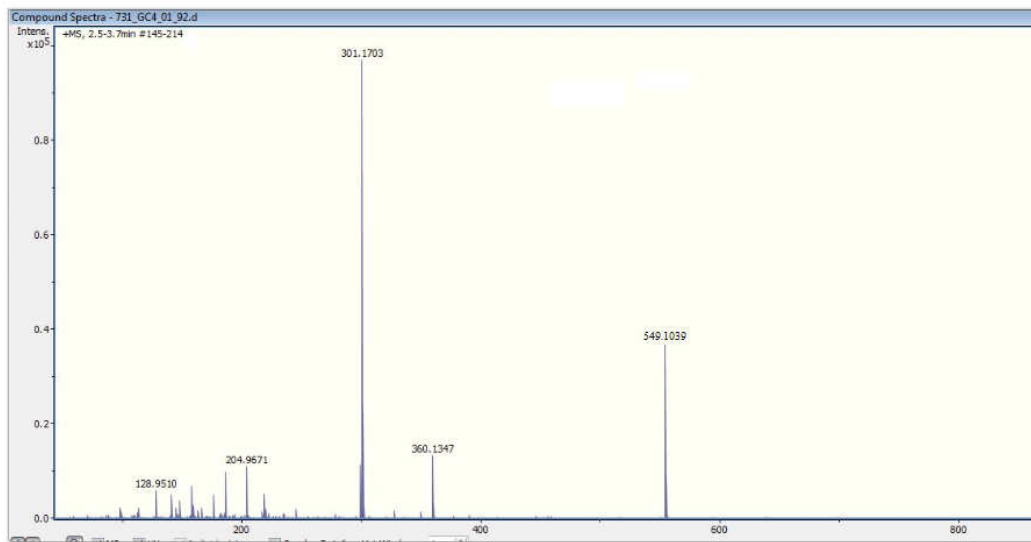

# <sup>1</sup>H NMR

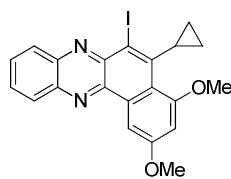

5-Cyclopropyl-6-iodo-2,4-dimethoxybenzo[*a*]phenazine (5h)

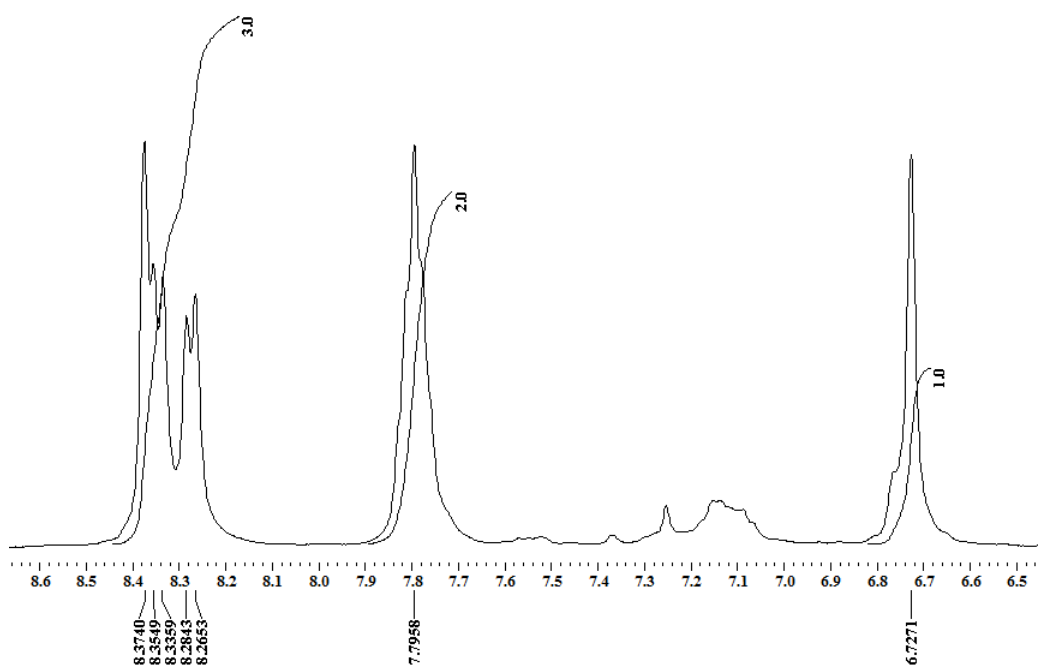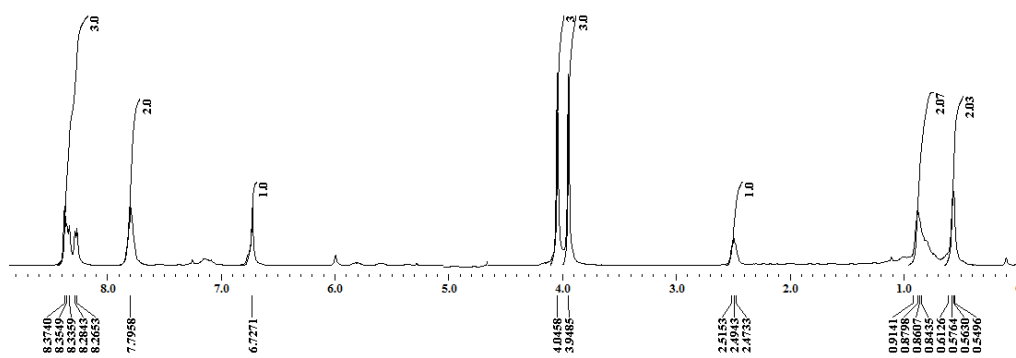



$^{13}\text{C}\{^1\text{H}\}$  NMR



5-Cyclopropyl-6-iodo-2,4-dimethoxybenzo[a]phenazine (5h)

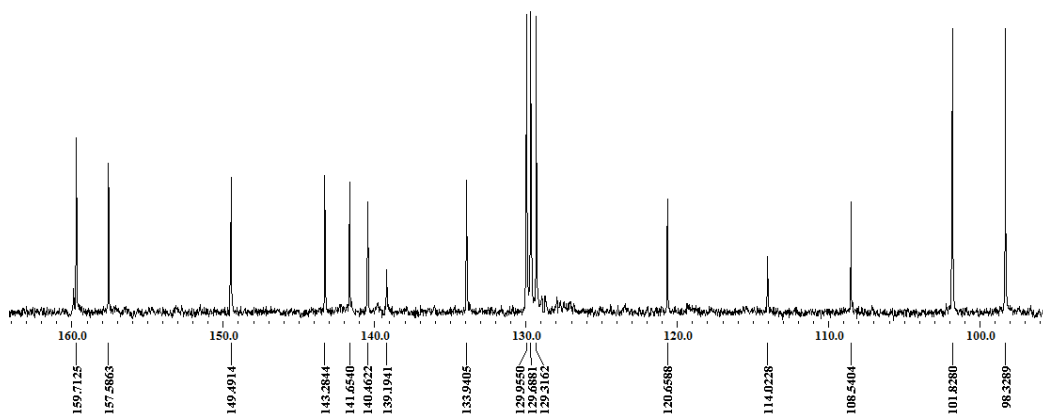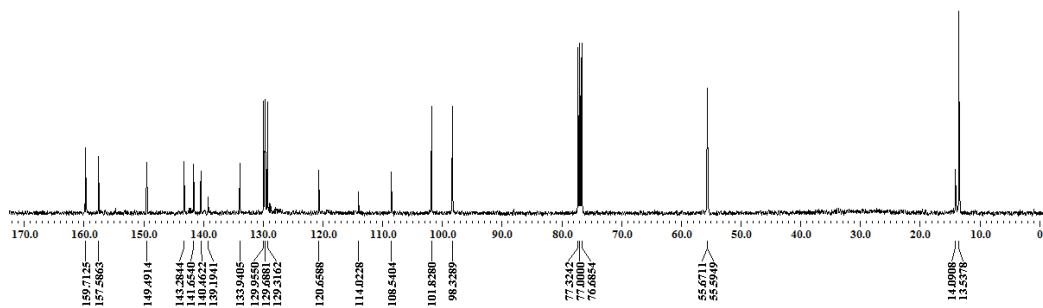

### HRMS

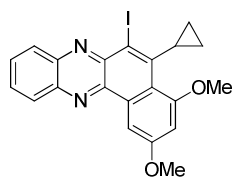

**5-Cyclopropyl-6-iodo-2,4-dimethoxybenzo[*a*]phenazine (5h)**

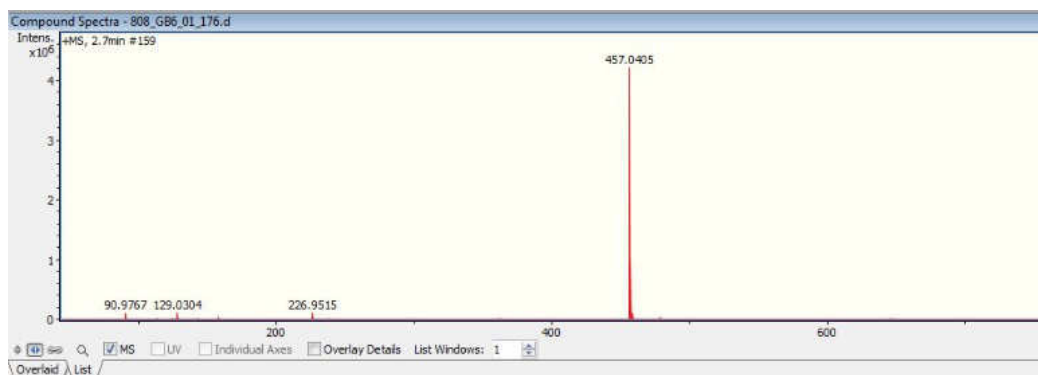

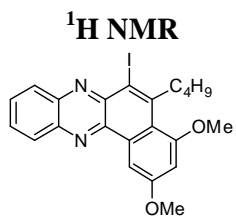

**5-Butyl-6-iodo-2,4-dimethoxybenzo[a]phenazine (5i)**

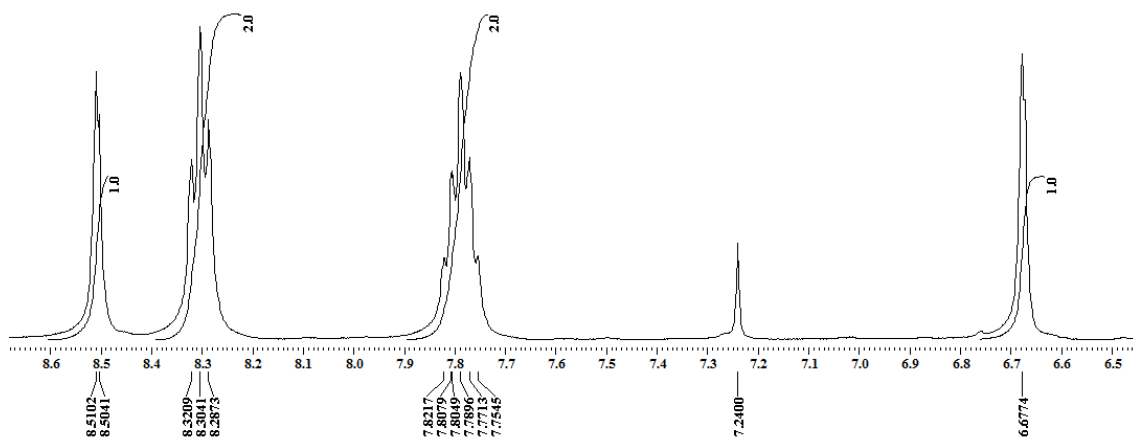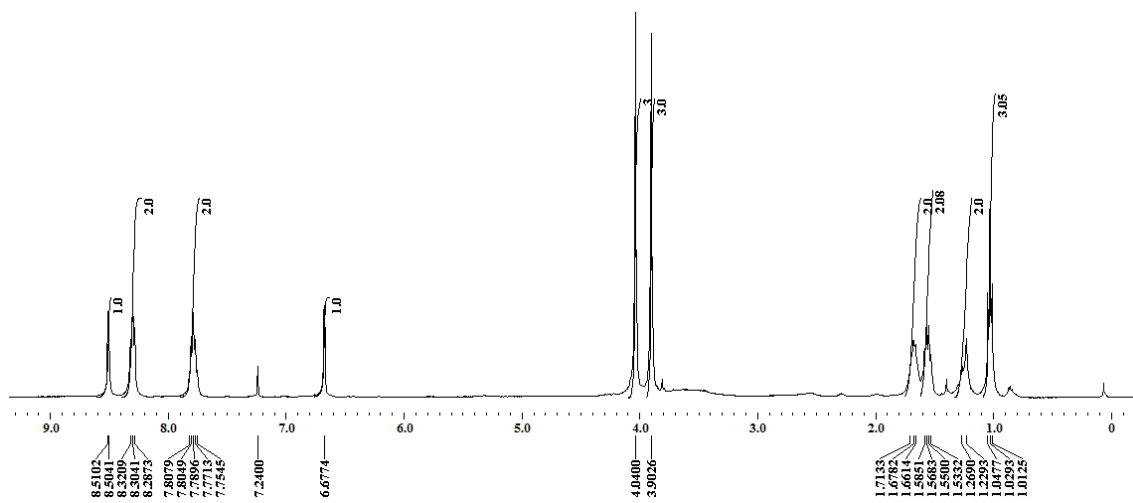

$^{13}\text{C}\{^1\text{H}\}$  NMR

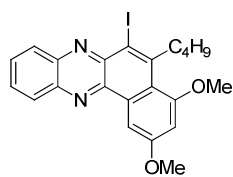

5-Butyl-6-iodo-2,4-dimethoxybenzo[a]phenazine (5i)

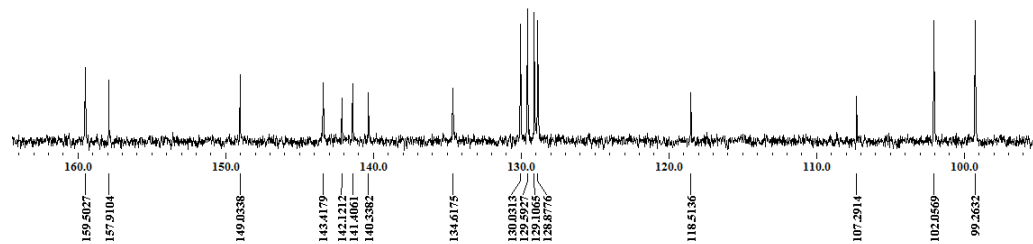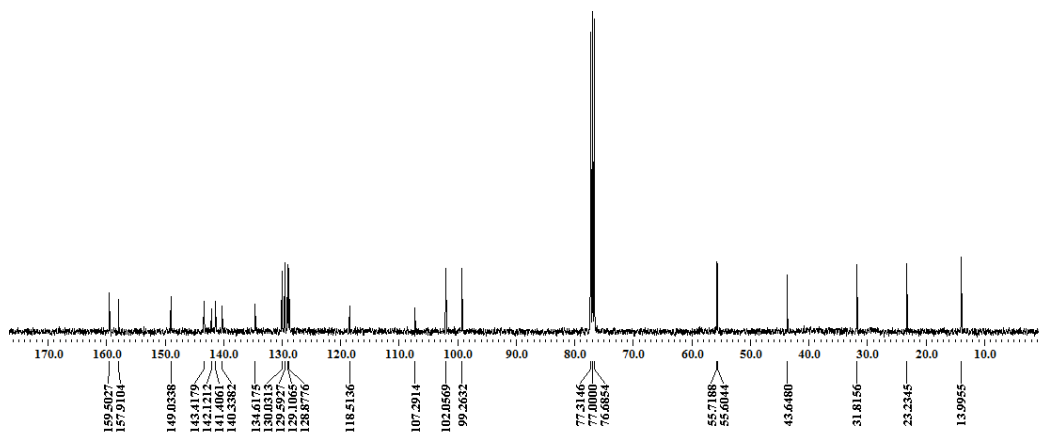

# HRMS

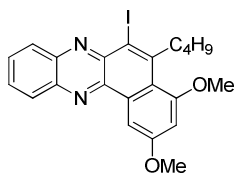

## 5-Butyl-6-iodo-2,4-dimethoxybenzo[a]phenazine (5i)

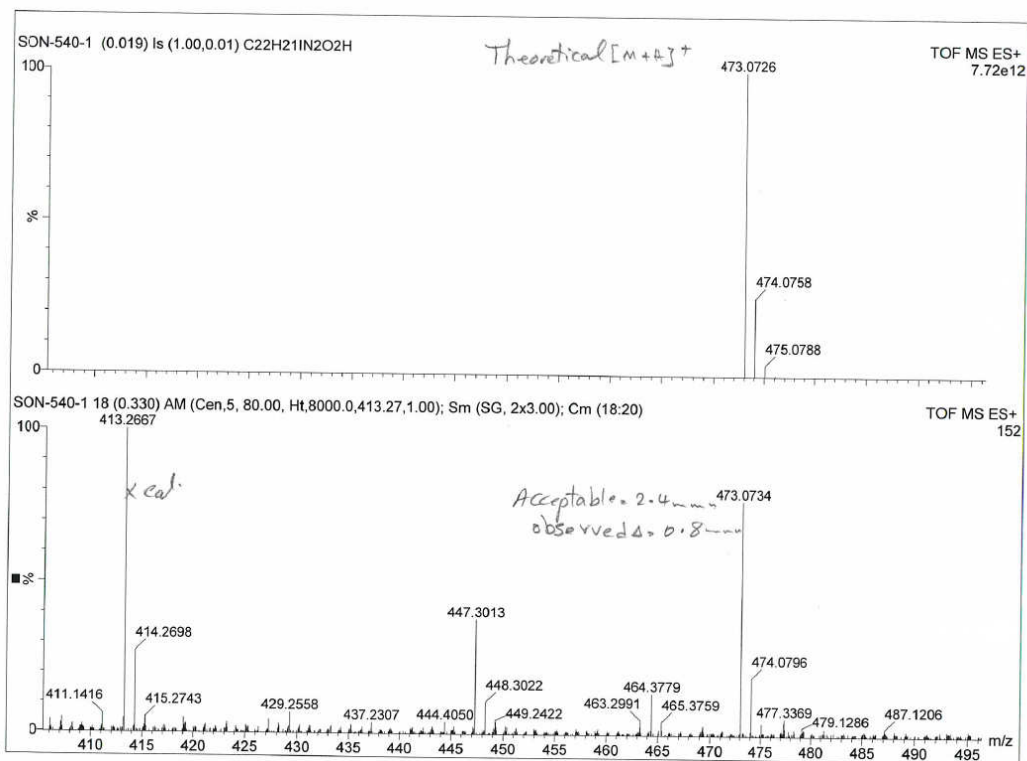

# <sup>1</sup>H NMR

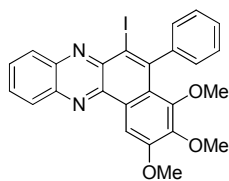

6-Iodo-2,3,4-trimethoxy-5-phenylbenzo[*a*]phenazine (5j)

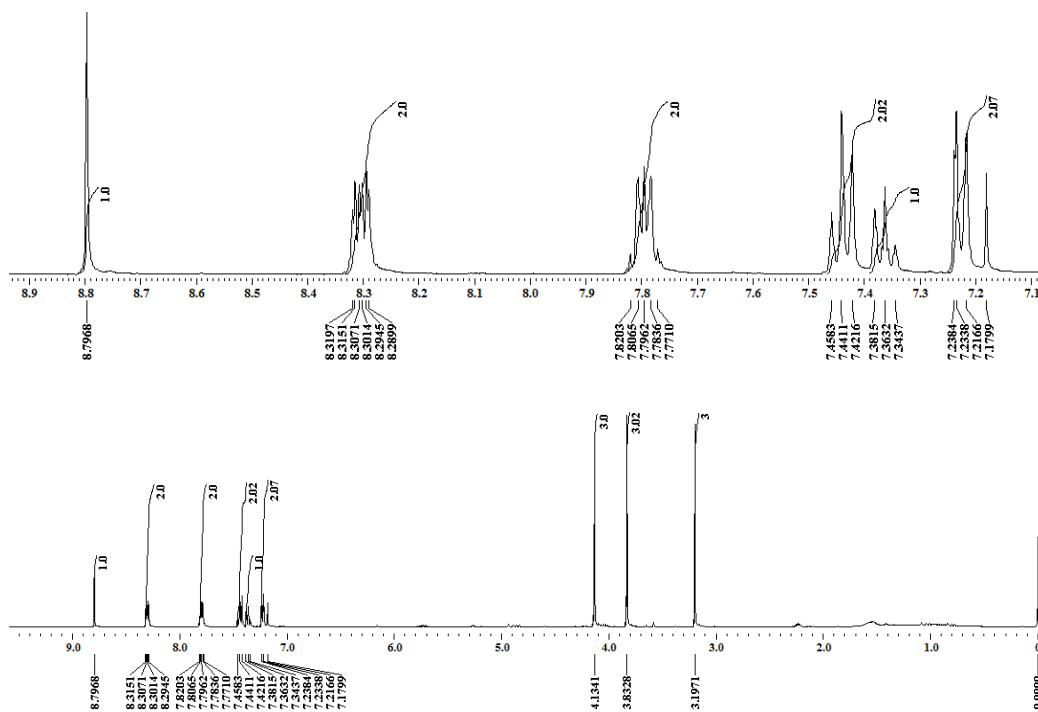

$^{13}\text{C}\{^1\text{H}\}$  NMR

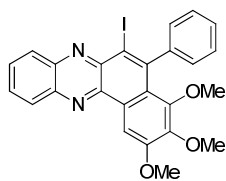

6-Iodo-2,3,4-trimethoxy-5-phenylbenzo[*a*]phenazine (5j)

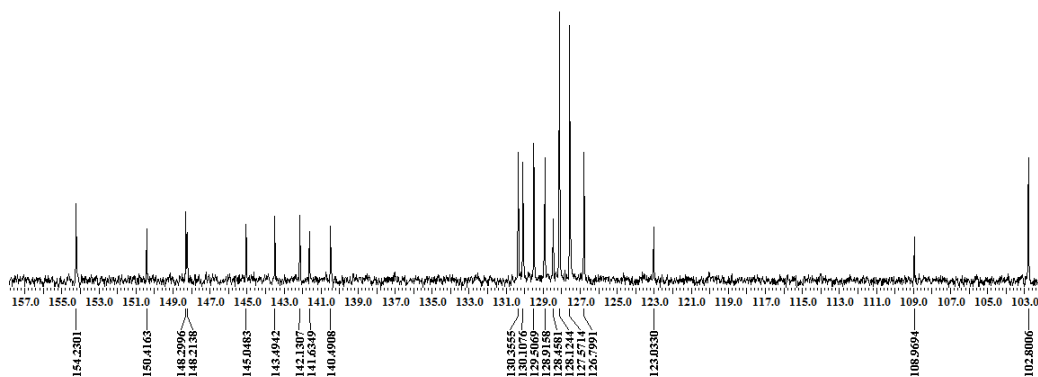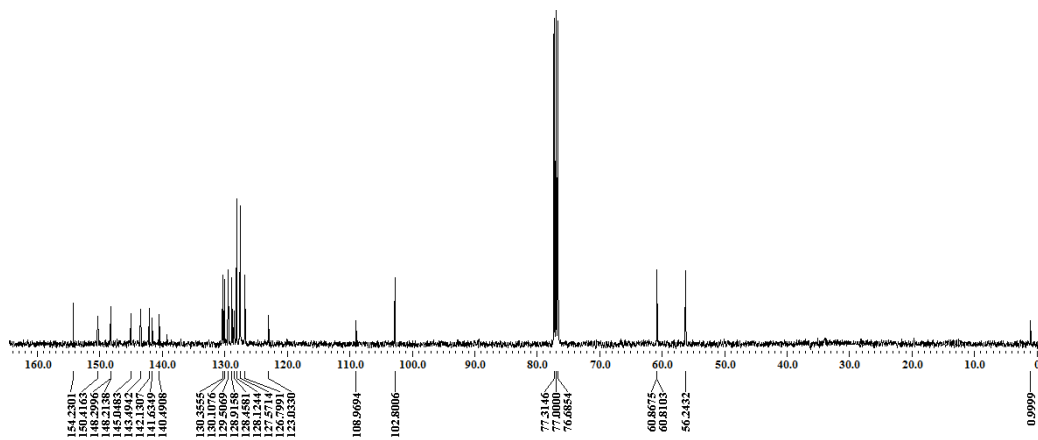

# HRMS

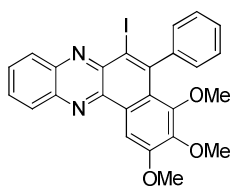

**6-Iodo-2,3,4-trimethoxy-5-phenylbenzo[*a*]phenazine (5j)**

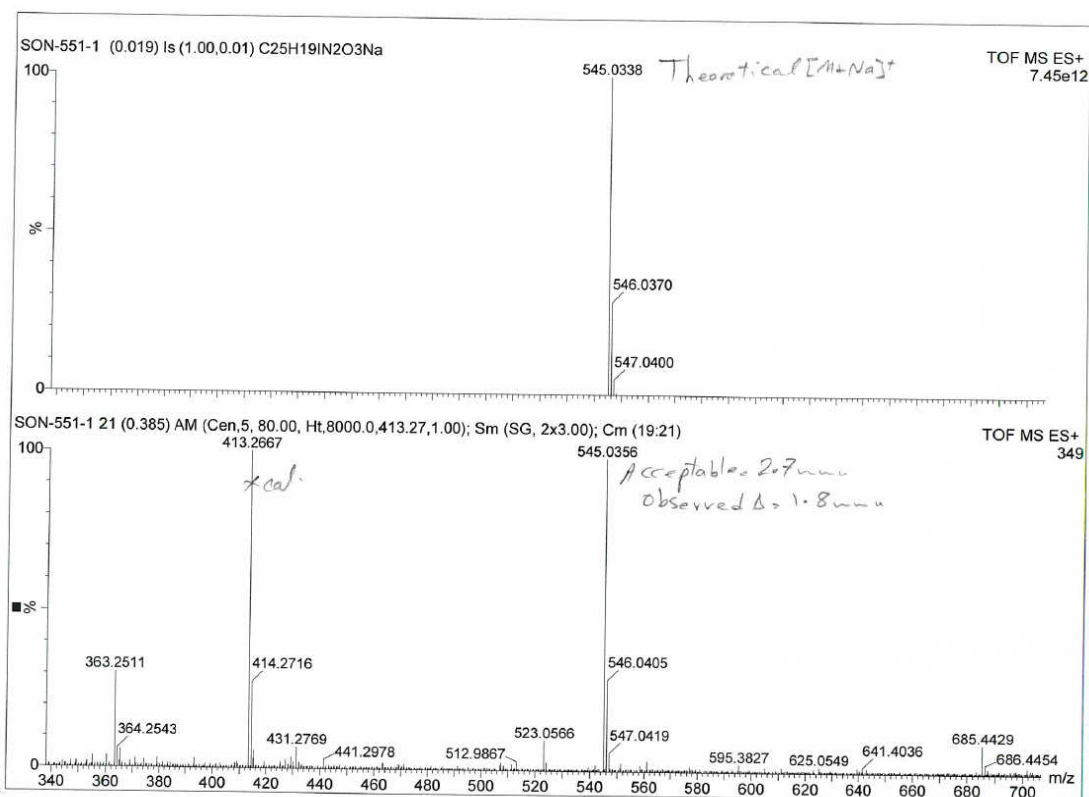



<sup>1</sup>H NMR

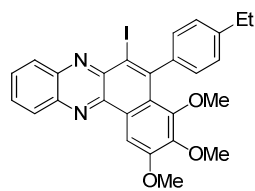

5-(4-Ethylphenyl)-6-iodo-2,3,4-trimethoxybenzo[*a*]phenazine (5k)

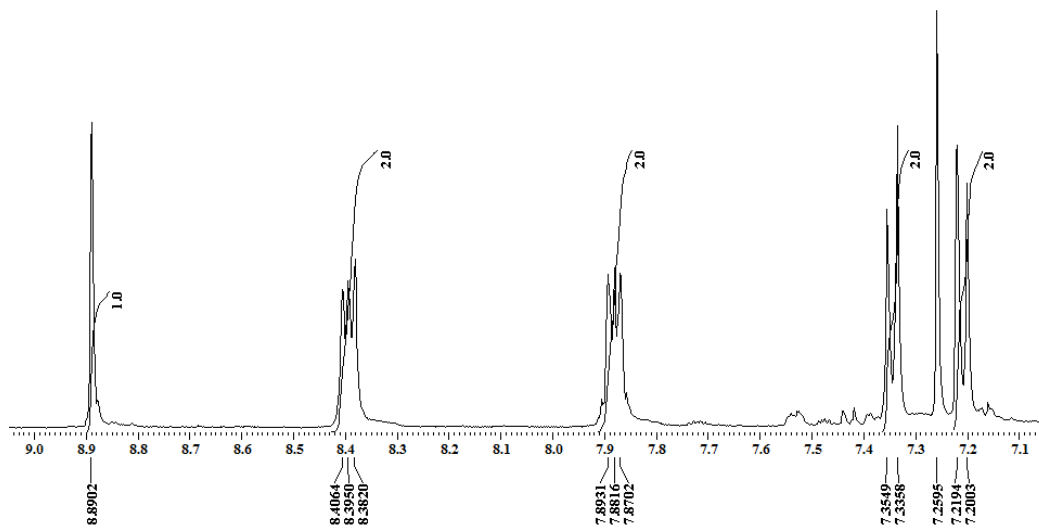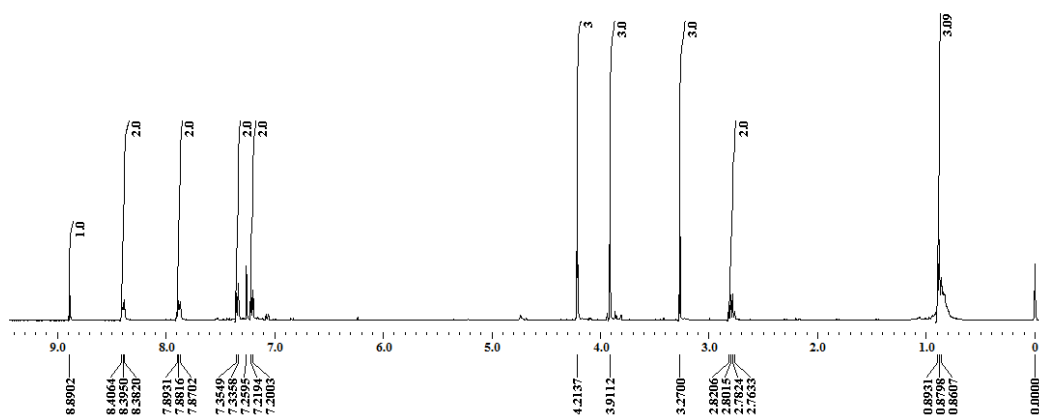

$^{13}\text{C}\{^1\text{H}\}$  NMR

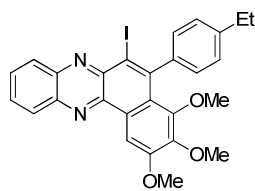

5-(4-Ethylphenyl)-6-iodo-2,3,4-trimethoxybenzo[*a*]phenazine (5k)

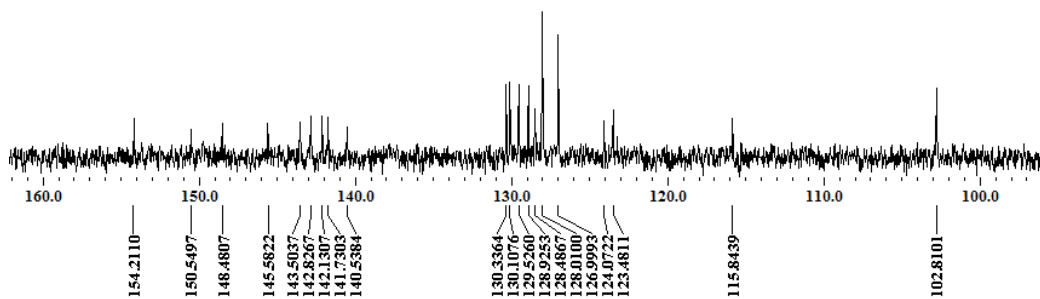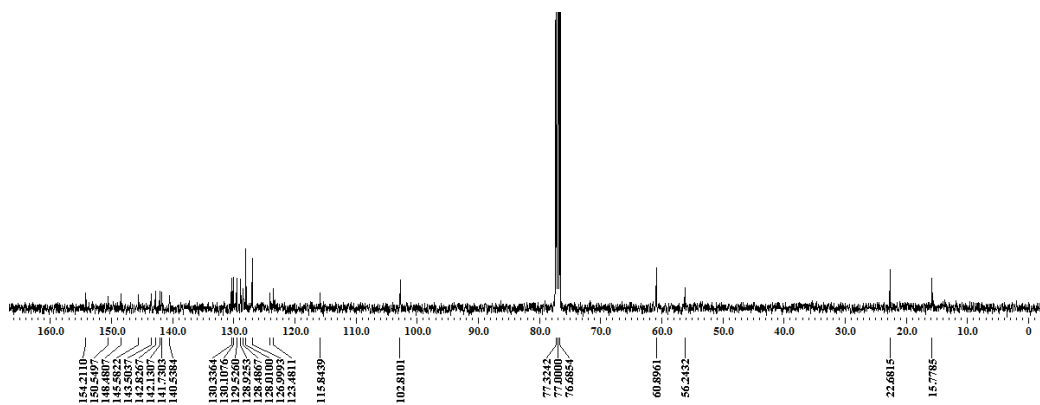

# HRMS

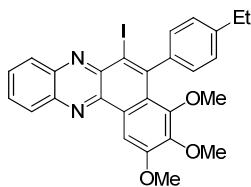

## 5-(4-Ethylphenyl)-6-iodo-2,3,4-trimethoxybenzo[a]phenazine (5k)

### Qualitative Compound Report

|                               |              |                      |                     |
|-------------------------------|--------------|----------------------|---------------------|
| <b>Data File</b>              | SON 820.d    | <b>Sample Name</b>   | SON 820             |
| <b>Sample Type</b>            | Sample       | <b>Position</b>      | P2-A5               |
| <b>Instrument Name</b>        | Instrument 1 | <b>User Name</b>     | SMILY               |
| <b>Acq Method</b>             | 29.10.2014.m | <b>Acquired Time</b> | 17-12-2015 14:34:08 |
| <b>IRM Calibration Status</b> | Success      | <b>DA Method</b>     | Default.m           |
| <b>Comment</b>                |              |                      |                     |

**Sample Group** Info.  
**Acquisition SW** 6200 series TOF/6500 series  
**Version** Q-TOF B.05.01 (B5125)

| Compound Label          | RT | Mass    | Formula         | MFG Formula     | MFG Diff (ppm) | DB Formula      |
|-------------------------|----|---------|-----------------|-----------------|----------------|-----------------|
| Cpd 13: C27 H23 I N2 O3 | 11 | 550.075 | C27 H23 I N2 O3 | C27 H23 I N2 O3 | 0.67           | C27 H23 I N2 O3 |

| Compound Label          | m/z      | RT | Algorithm                 | Mass    |
|-------------------------|----------|----|---------------------------|---------|
| Cpd 13: C27 H23 I N2 O3 | 551.0823 | 11 | Find by Molecular Feature | 550.075 |

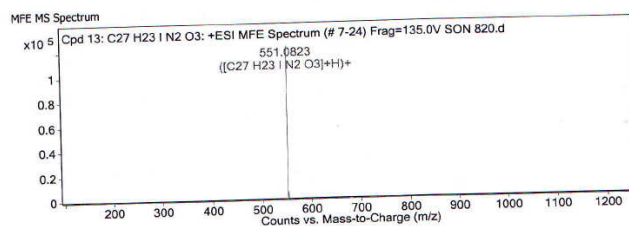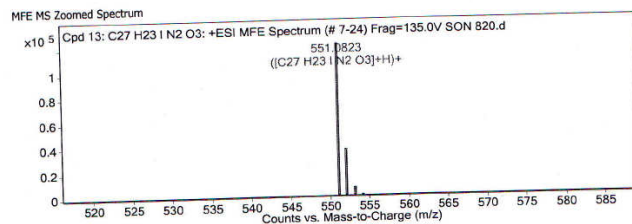

| m/z      | z | Abund     | Formula         | Ion    |
|----------|---|-----------|-----------------|--------|
| 551.0823 | 1 | 123185.05 | C27 H23 I N2 O3 | (M+H)+ |
| 552.0854 | 1 | 36037.03  | C27 H23 I N2 O3 | (M+H)+ |
| 553.0884 | 1 | 5930.81   | C27 H23 I N2 O3 | (M+H)+ |
| 554.0917 | 1 | 663.33    | C27 H23 I N2 O3 | (M+H)+ |

--- End Of Report ---

# <sup>1</sup>H NMR

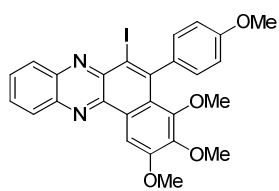

**6-Iodo-2,3,4-trimethoxy-5-(4-methoxyphenyl)benzo[*a*]phenazine (51)**

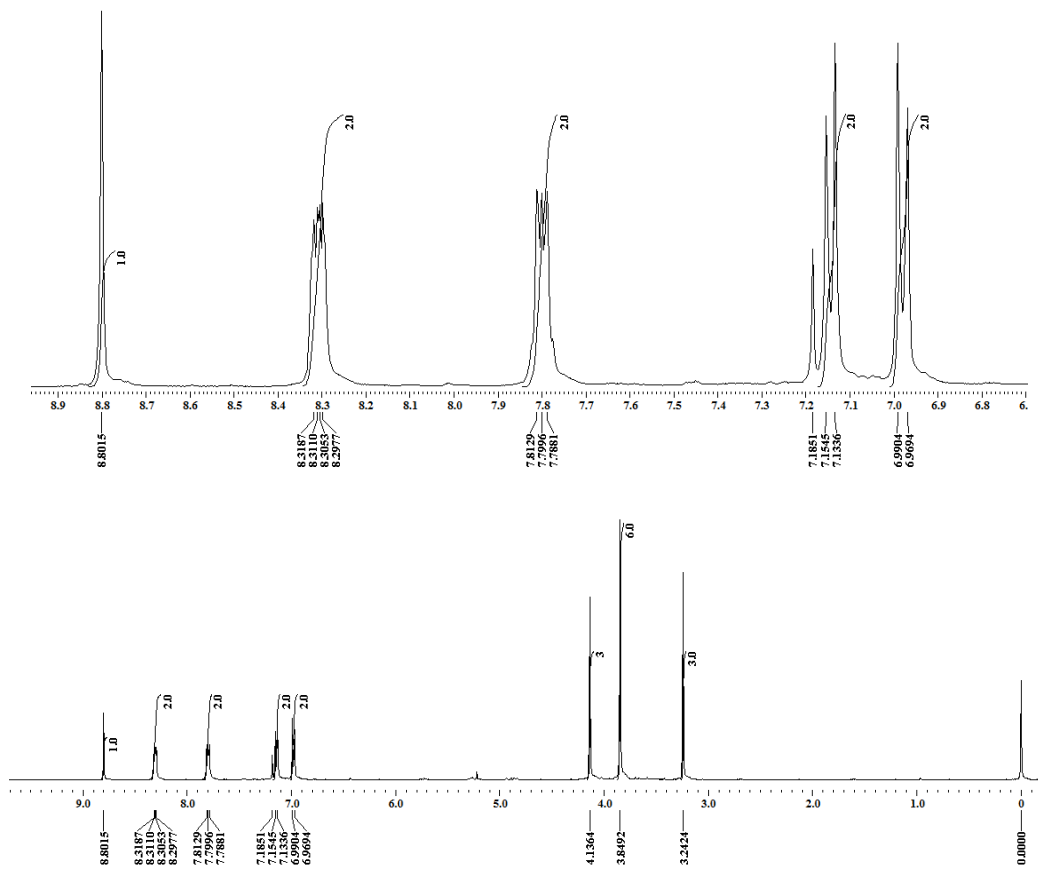

$^{13}\text{C}\{^1\text{H}\}$  NMR

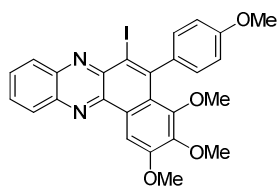

**6-Iodo-2,3,4-trimethoxy-5-(4-methoxyphenyl)benzo[*a*]phenazine (51)**

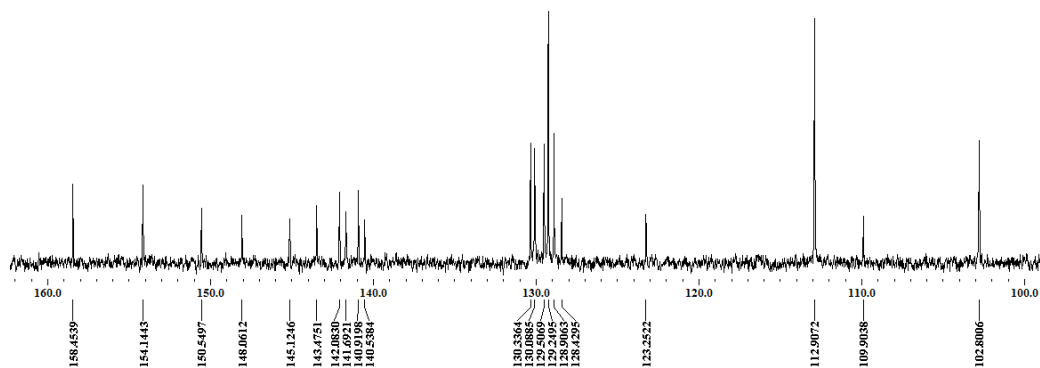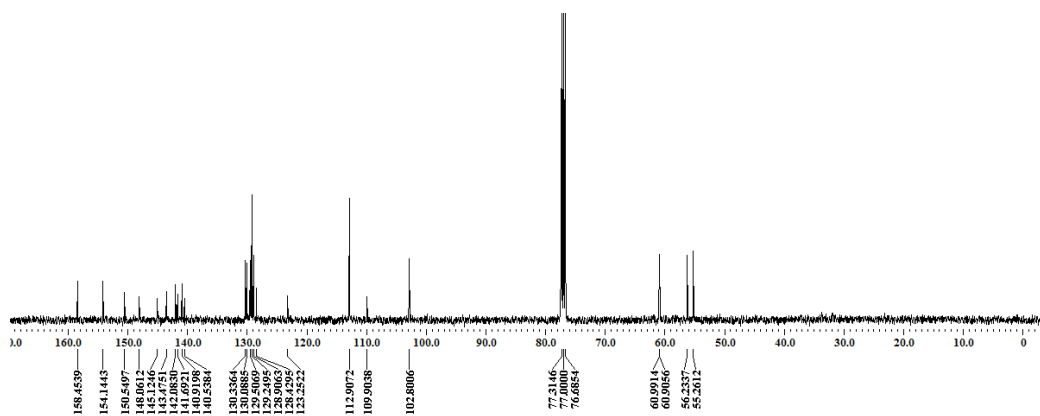

# HRMS



**6-Iodo-2,3,4-trimethoxy-5-(4-methoxyphenyl)benzo[*a*]phenazine (51)**

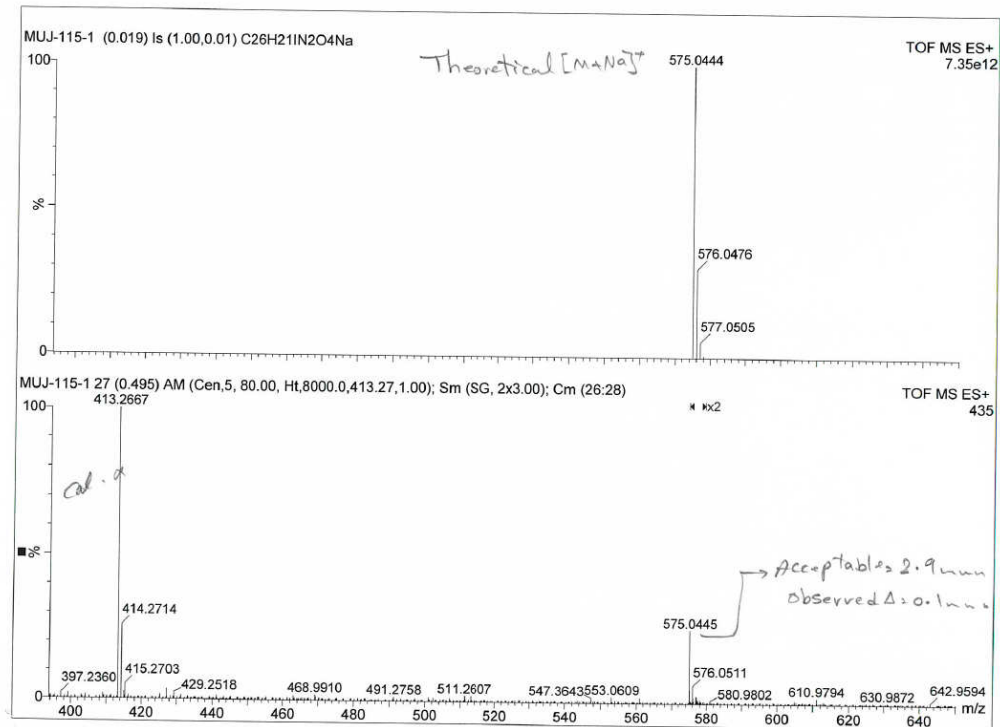

# <sup>1</sup>H NMR

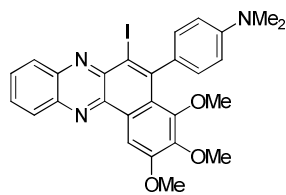

4-(6-Iodo-2,3,4-trimethoxybenzo[a]phenazin-5-yl)-N,N-dimethylaniline (5m)

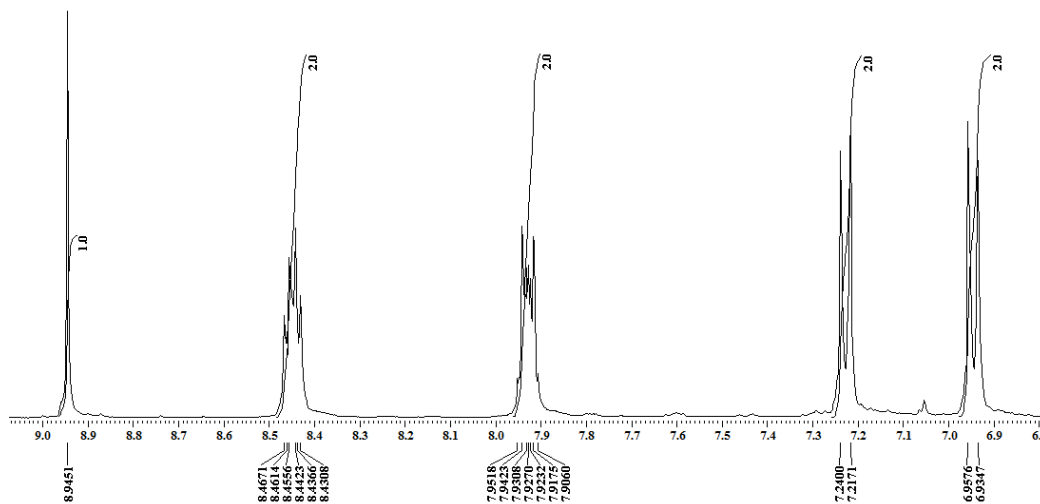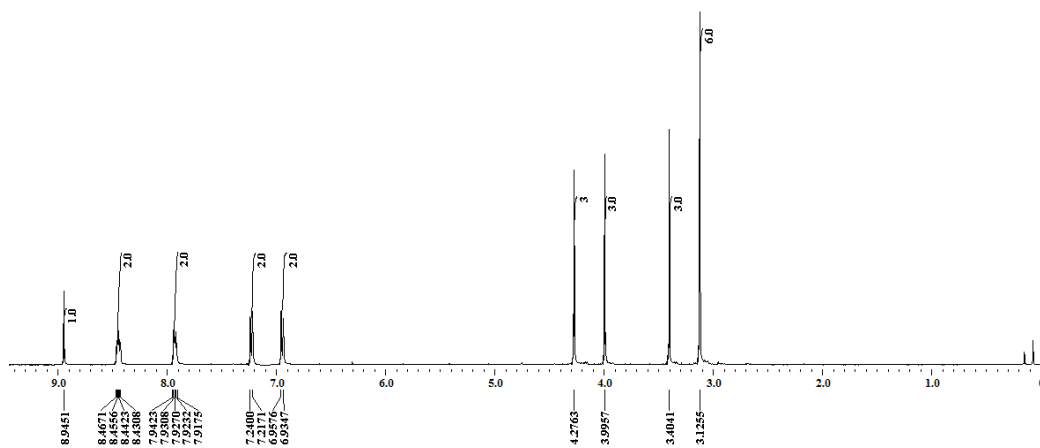

$^{13}\text{C}\{^1\text{H}\}$  NMR

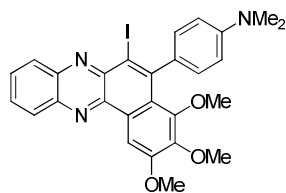

4-(6-Iodo-2,3,4-trimethoxybenzo[*a*]phenazin-5-yl)-*N,N*-dimethylaniline (5m)

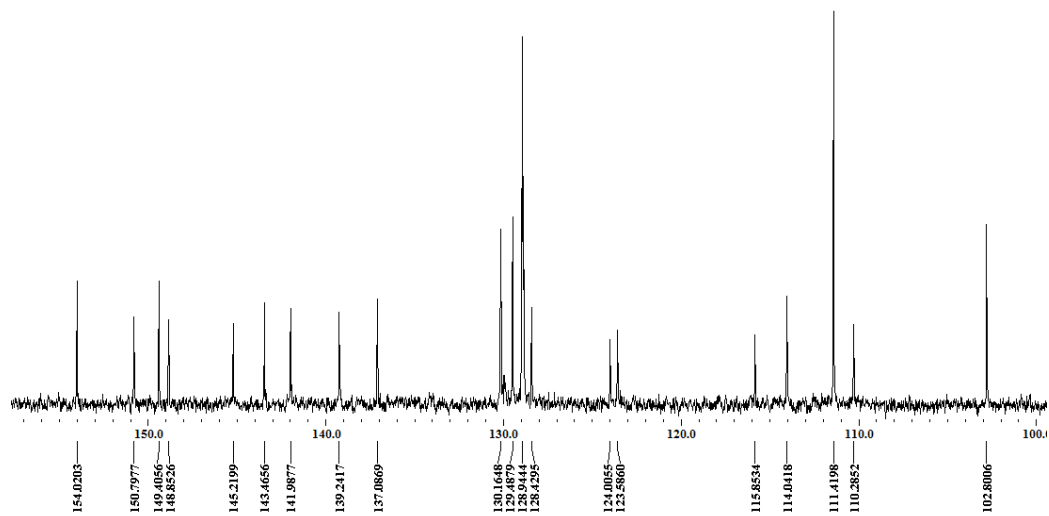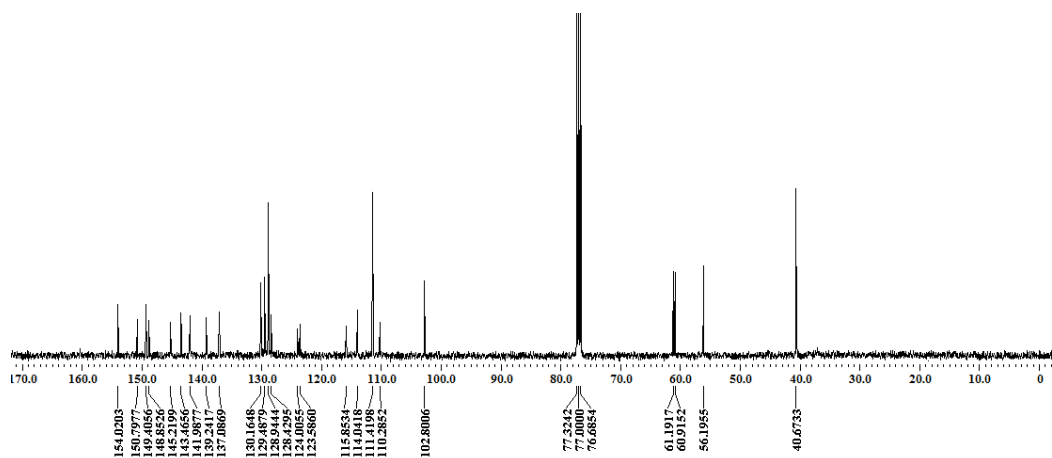



## HRMS

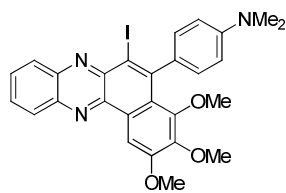

**4-(6-Iodo-2,3,4-trimethoxybenzo[a]phenazin-5-yl)-N,N-dimethylaniline (5m)**

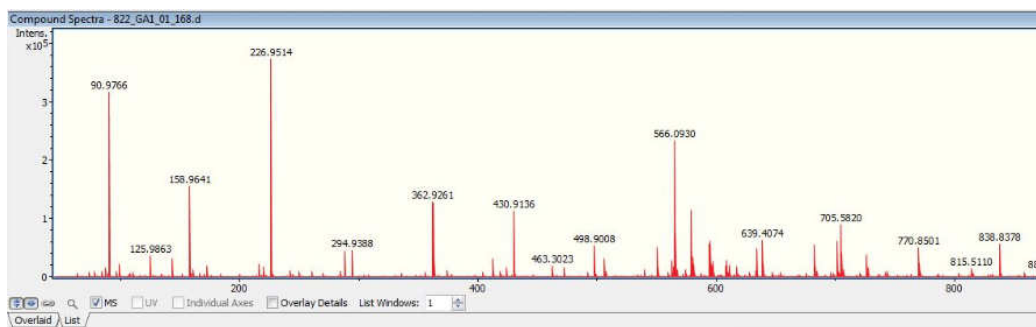

# <sup>1</sup>H NMR

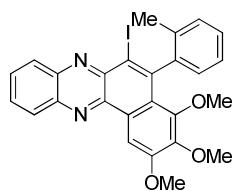

6-Iodo-2,3,4-trimethoxy-5-(*o*-tolyl)benzo[*a*]phenazine (5n)

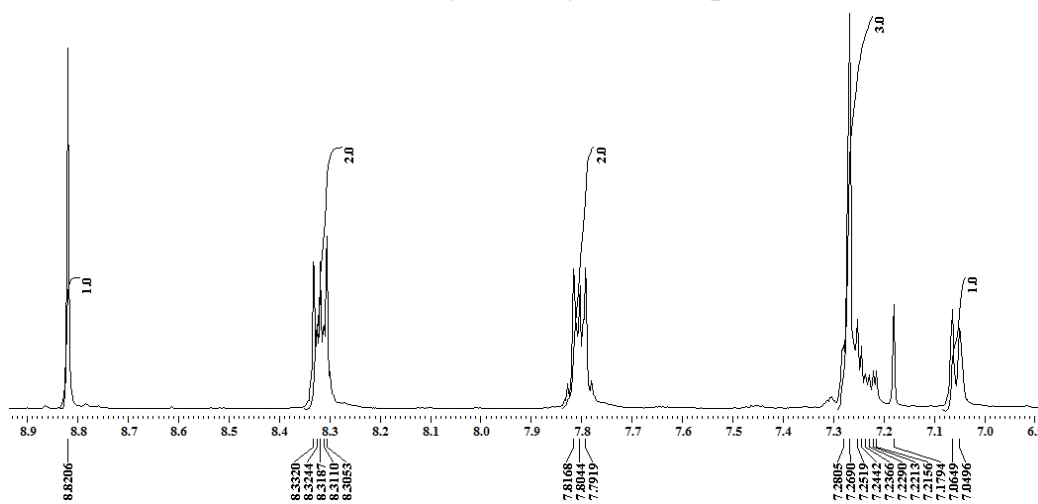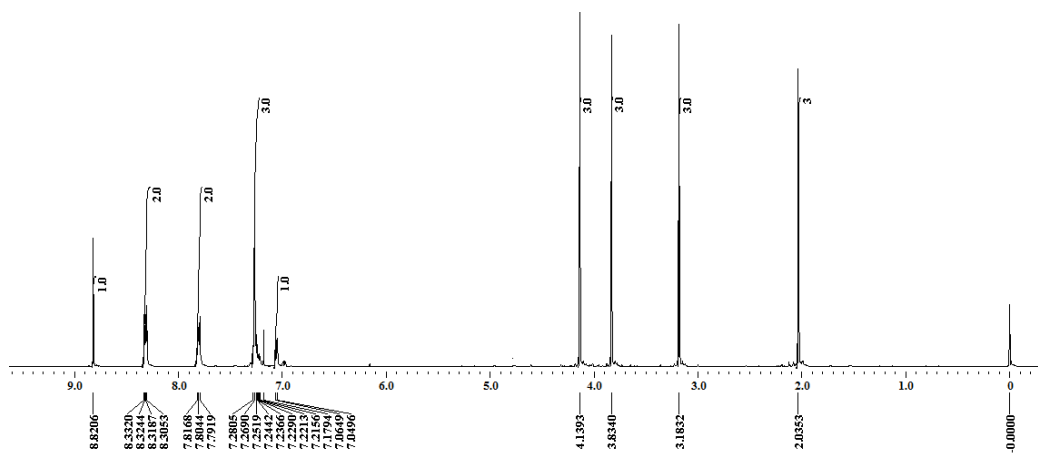

$^{13}\text{C}\{^1\text{H}\}$  NMR

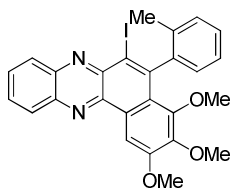

6-Iodo-2,3,4-trimethoxy-5-(*o*-tolyl)benzo[*a*]phenazine (5n)

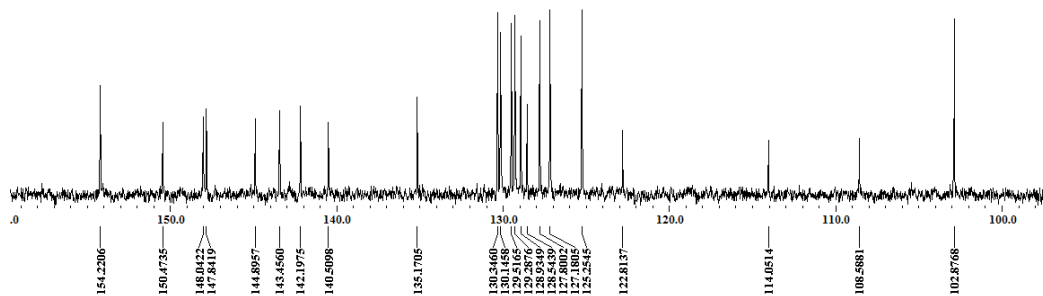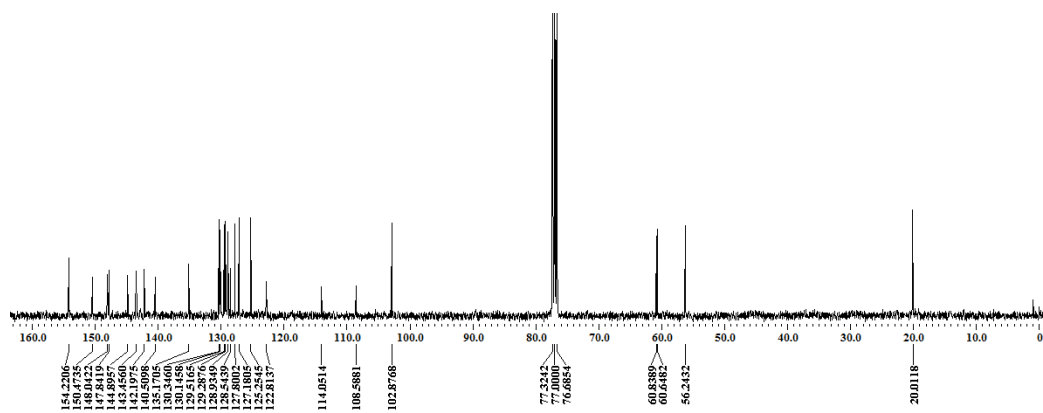

# HRMS

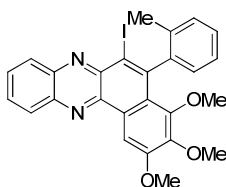

## 6-Iodo-2,3,4-trimethoxy-5-(*o*-tolyl)benzo[*a*]phenazine (5n)

### Qualitative Compound Report

|                               |              |                      |                     |
|-------------------------------|--------------|----------------------|---------------------|
| <b>Data File</b>              | AB 821.d     | <b>Sample Name</b>   | AB 821              |
| <b>Sample Type</b>            | Sample       | <b>Position</b>      | P2-B5               |
| <b>Instrument Name</b>        | Instrument 1 | <b>User Name</b>     | SMILY               |
| <b>Acq Method</b>             | 29.10.2014.m | <b>Acquired Time</b> | 17-12-2015 14:33:16 |
| <b>IRM Calibration Status</b> | Success      | <b>DA Method</b>     | Default.m           |
| <b>Comment</b>                |              |                      |                     |

|                       |                             |              |
|-----------------------|-----------------------------|--------------|
| <b>Sample Group</b>   |                             | <b>Info.</b> |
| <b>Acquisition SW</b> | 6200 series TOF/6500 series |              |
| <b>Version</b>        | Q-TOF B.05.01 (B5125)       |              |

#### Compound Table

| Compound Label                                                         | RT | Mass     | Formula                                                         | MFG Formula                                                     | MFG Diff (ppm) | DB Formula                                                      |
|------------------------------------------------------------------------|----|----------|-----------------------------------------------------------------|-----------------------------------------------------------------|----------------|-----------------------------------------------------------------|
| Cpd 1: C <sub>26</sub> H <sub>21</sub> I N <sub>2</sub> O <sub>3</sub> | 11 | 536.0598 | C <sub>26</sub> H <sub>21</sub> I N <sub>2</sub> O <sub>3</sub> | C <sub>26</sub> H <sub>21</sub> I N <sub>2</sub> O <sub>3</sub> | -0.2           | C <sub>26</sub> H <sub>21</sub> I N <sub>2</sub> O <sub>3</sub> |

| Compound Label                                                         | <i>m/z</i> | RT | Algorithm                 | Mass     |
|------------------------------------------------------------------------|------------|----|---------------------------|----------|
| Cpd 1: C <sub>26</sub> H <sub>21</sub> I N <sub>2</sub> O <sub>3</sub> | 537.0672   | 11 | Find by Molecular Feature | 536.0598 |

#### MFE MS Spectrum

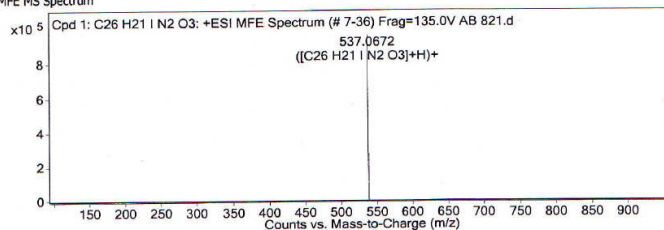

#### MFE MS Zoomed Spectrum

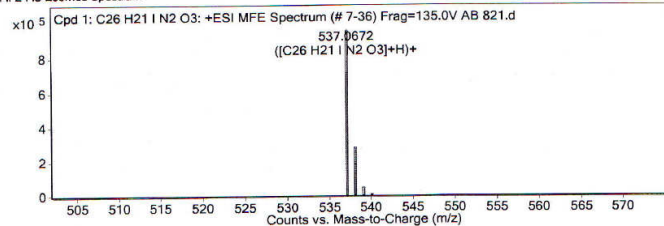

#### MS Spectrum Peak List

| <i>m/z</i> | <i>z</i> | Abund     | Formula                                                         | Ion                |
|------------|----------|-----------|-----------------------------------------------------------------|--------------------|
| 537.0672   | 1        | 966871.94 | C <sub>26</sub> H <sub>21</sub> I N <sub>2</sub> O <sub>3</sub> | (M+H) <sup>+</sup> |
| 538.0699   | 1        | 276025.55 | C <sub>26</sub> H <sub>21</sub> I N <sub>2</sub> O <sub>3</sub> | (M+H) <sup>+</sup> |
| 539.0726   | 1        | 41984.22  | C <sub>26</sub> H <sub>21</sub> I N <sub>2</sub> O <sub>3</sub> | (M+H) <sup>+</sup> |
| 540.0755   | 1        | 5186.54   | C <sub>26</sub> H <sub>21</sub> I N <sub>2</sub> O <sub>3</sub> | (M+H) <sup>+</sup> |
| 541.0787   | 1        | 394.95    | C <sub>26</sub> H <sub>21</sub> I N <sub>2</sub> O <sub>3</sub> | (M+H) <sup>+</sup> |

--- End Of Report ---

# <sup>1</sup>H NMR

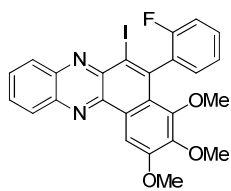

5-(2-Fluorophenyl)-6-iodo-2,3,4-trimethoxybenzo[*a*]phenazine (50)

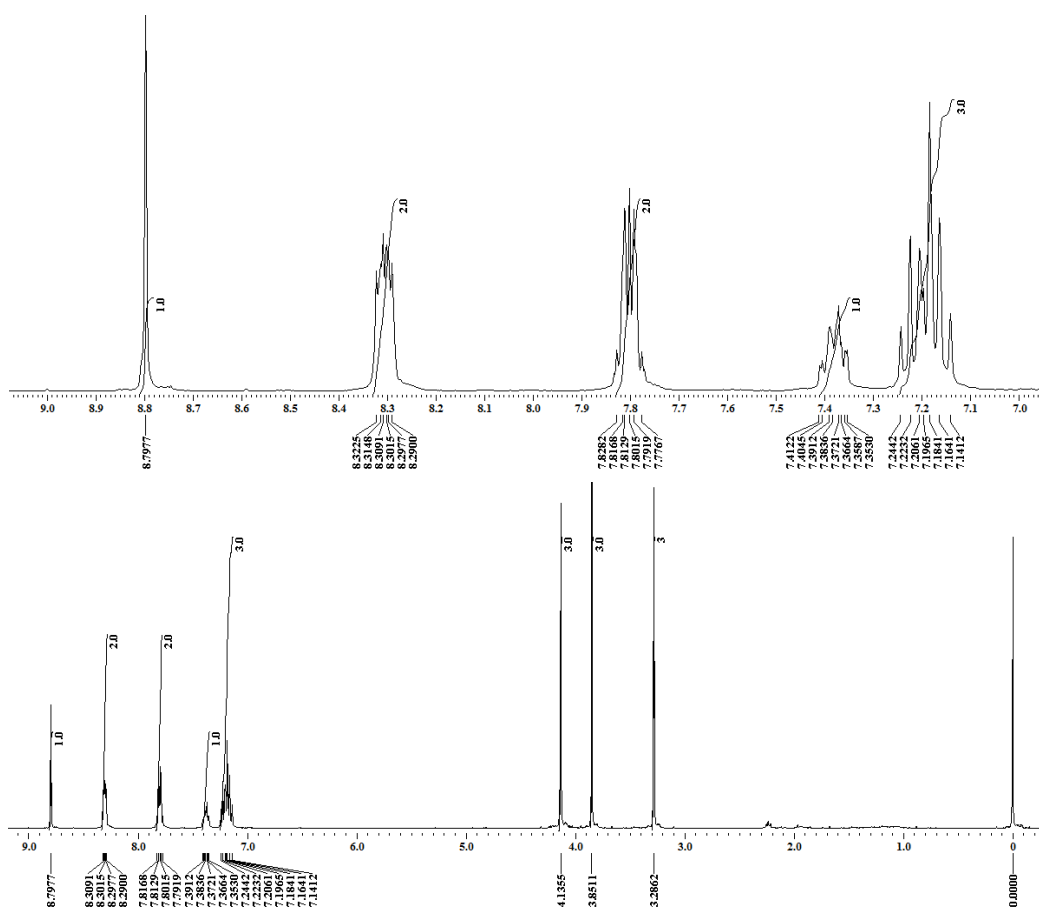

$^{13}\text{C}\{^1\text{H}\}$  NMR

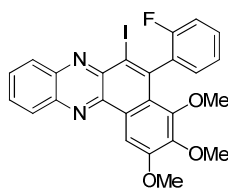

5-(2-Fluorophenyl)-6-iodo-2,3,4-trimethoxybenzo[*a*]phenazine (5o)

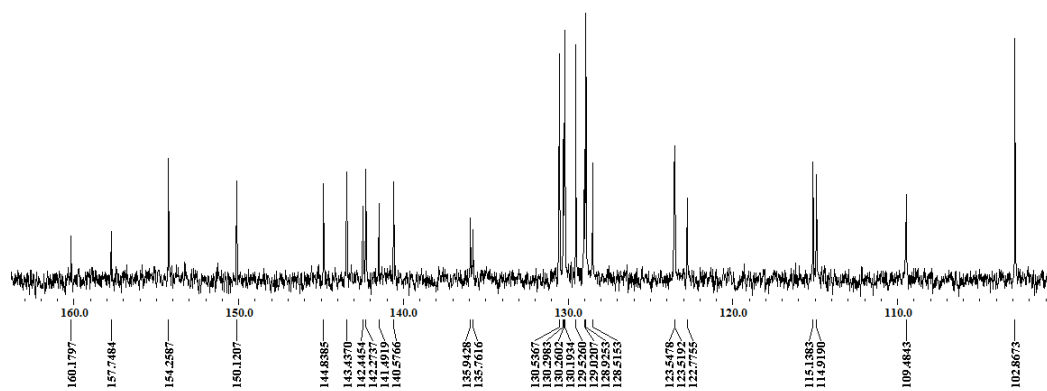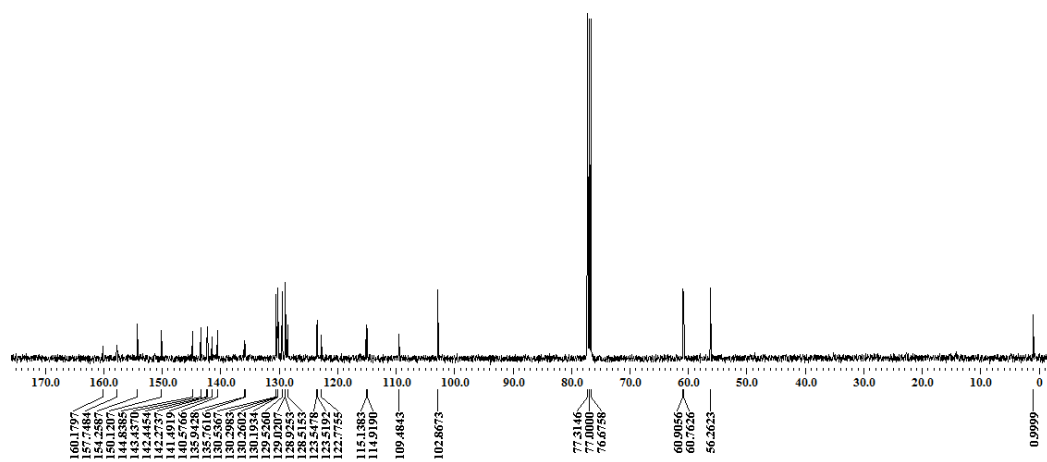

### HRMS

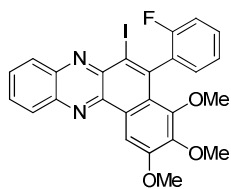

**5-(2-Fluorophenyl)-6-iodo-2,3,4-trimethoxybenzo[*a*]phenazine (5o)**

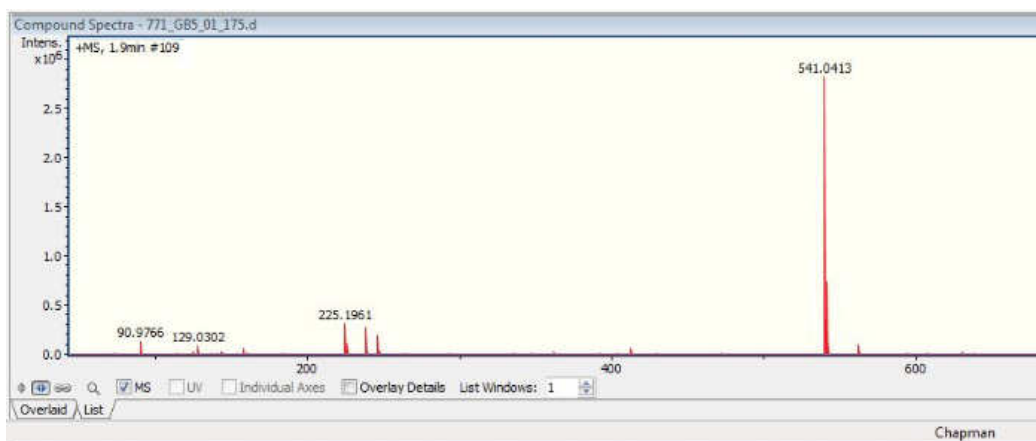

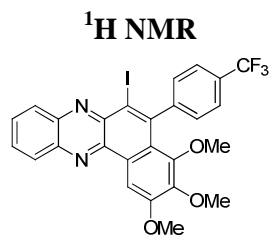

**6-Iodo-2,3,4-trimethoxy-5-(4-(trifluoromethyl)phenyl)benzo[a]phenazine (5p)**

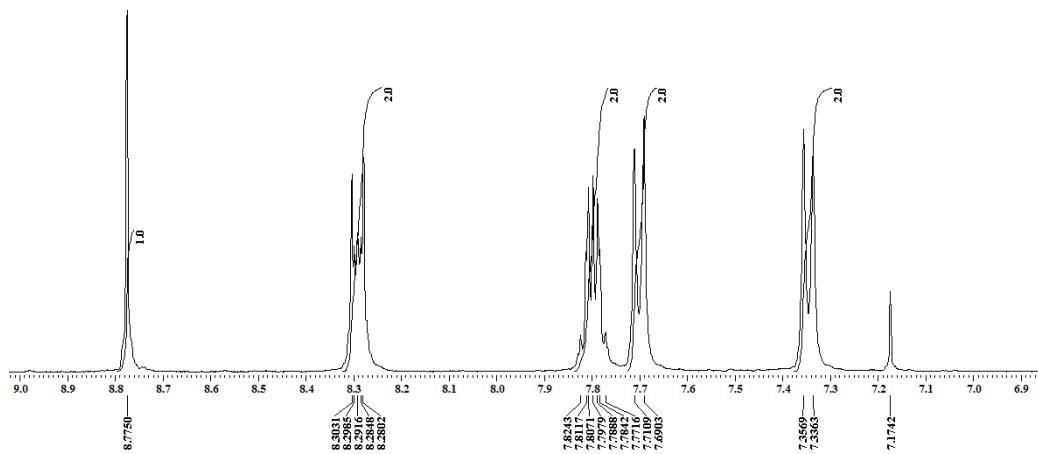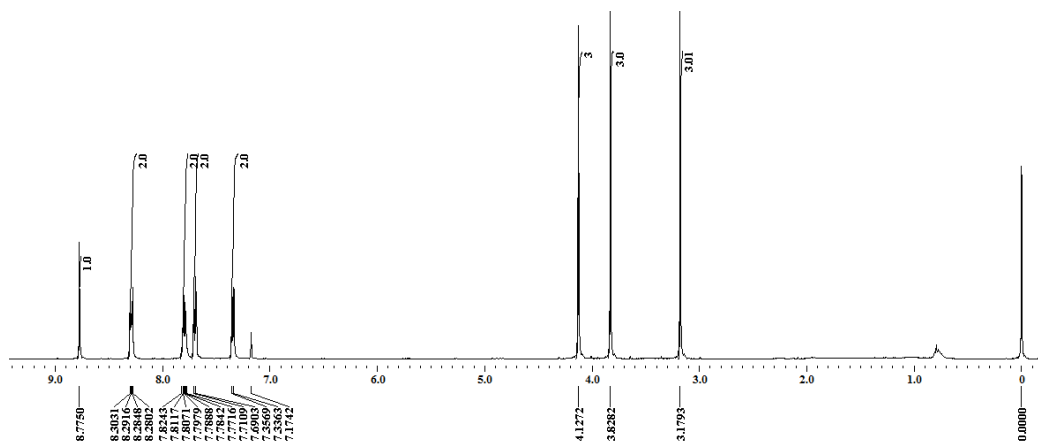



$^{13}\text{C}\{^1\text{H}\}$  NMR

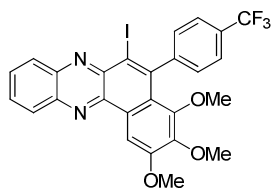

6-Iodo-2,3,4-trimethoxy-5-(4-(trifluoromethyl)phenyl)benzo[a]phenazine (5p)

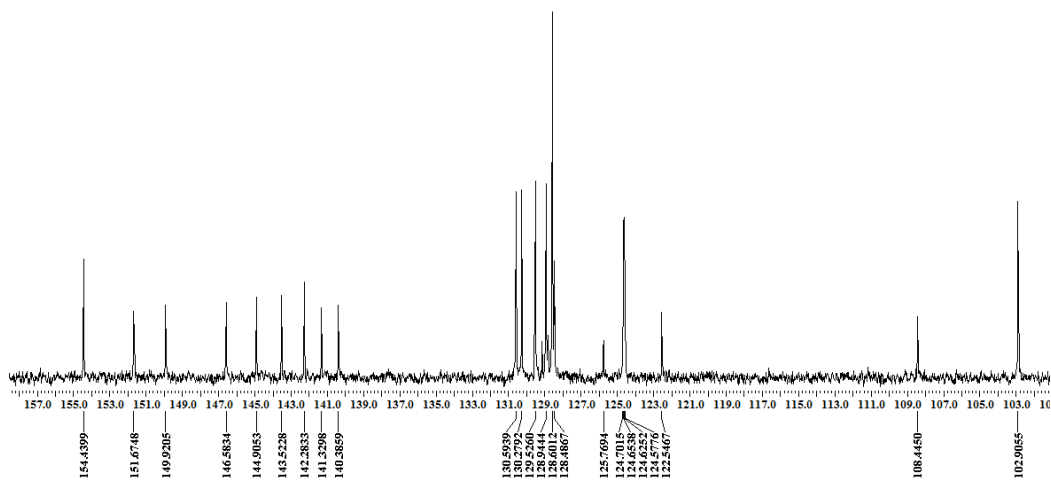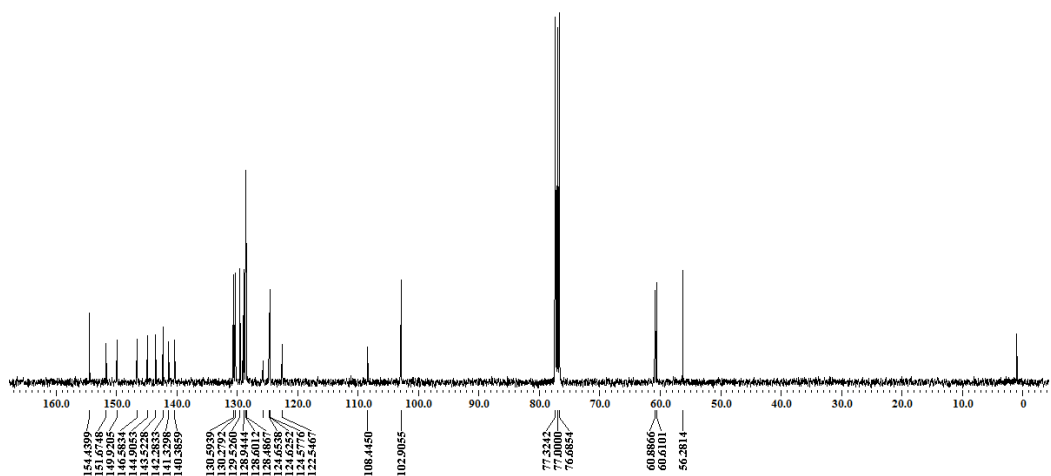

# HRMS

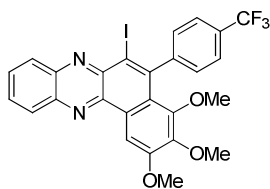

**6-Iodo-2,3,4-trimethoxy-5-(4-(trifluoromethyl)phenyl)benzo[a]phenazine (5p)**

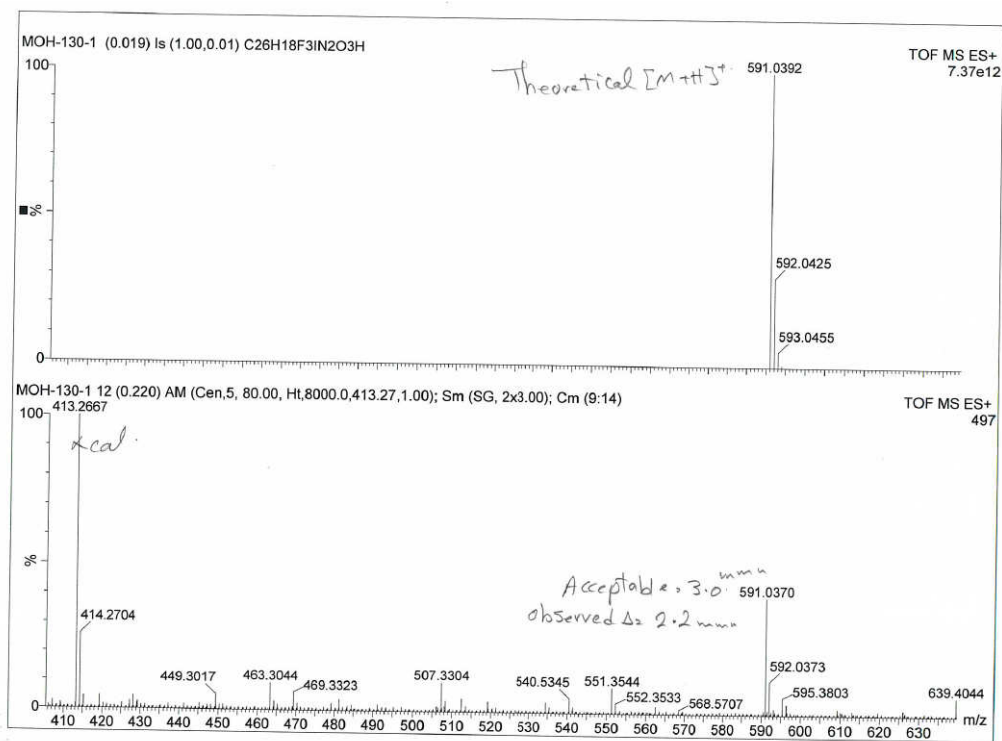

# <sup>1</sup>H NMR

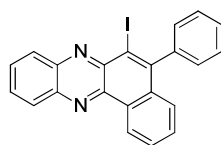

6-Iodo-5-phenylbenzo[*a*]phenazine (5q)

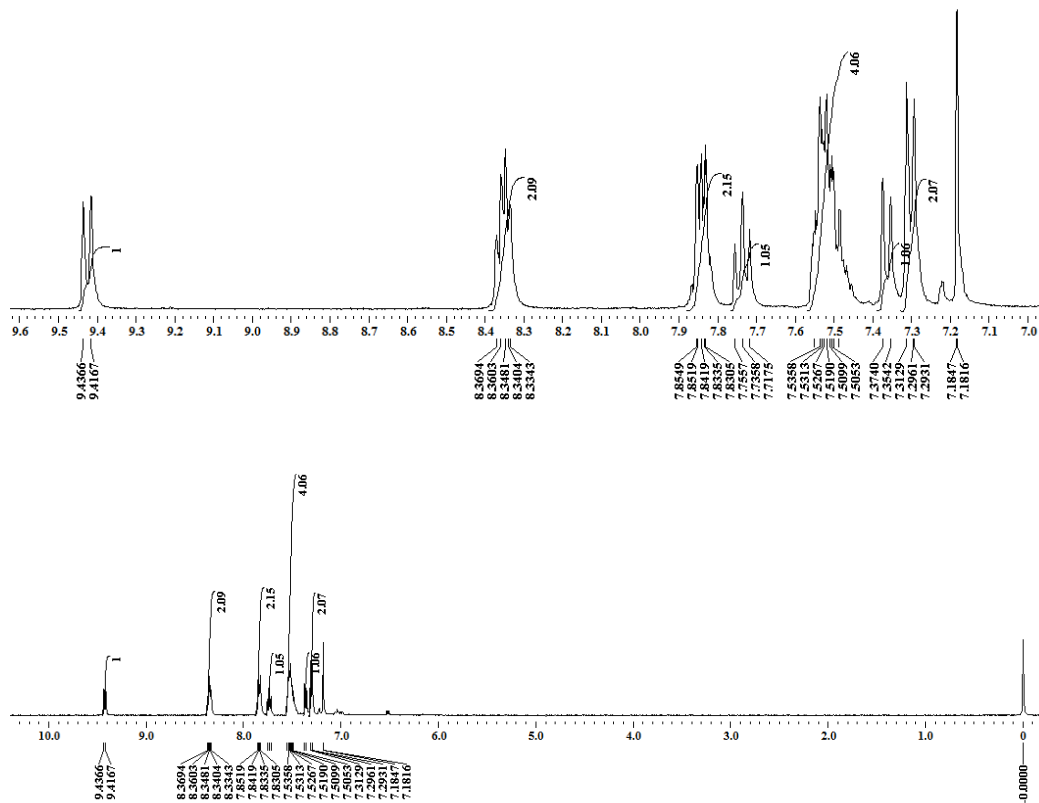

$^{13}\text{C}\{^1\text{H}\}$  NMR



6-Iodo-5-phenylbenzo[*a*]phenazine (5q)

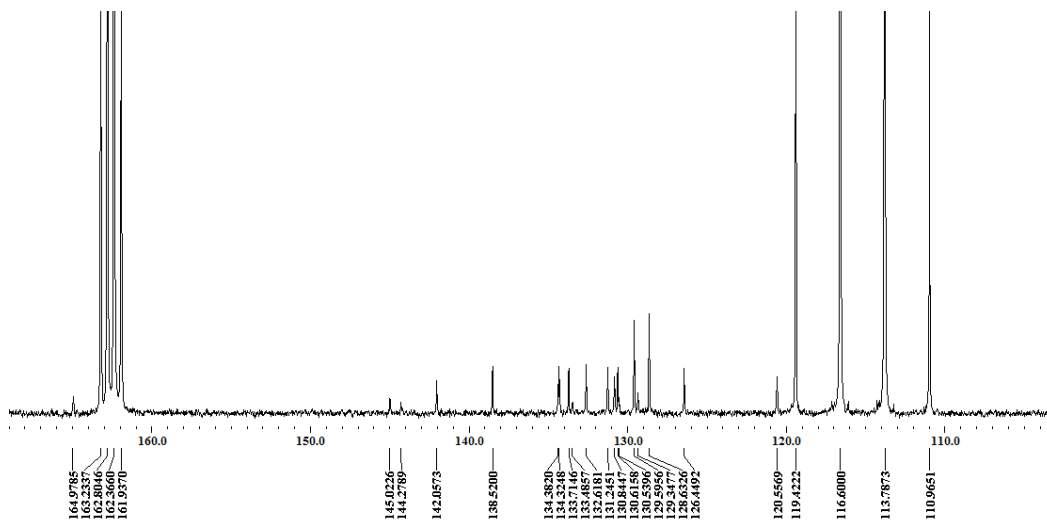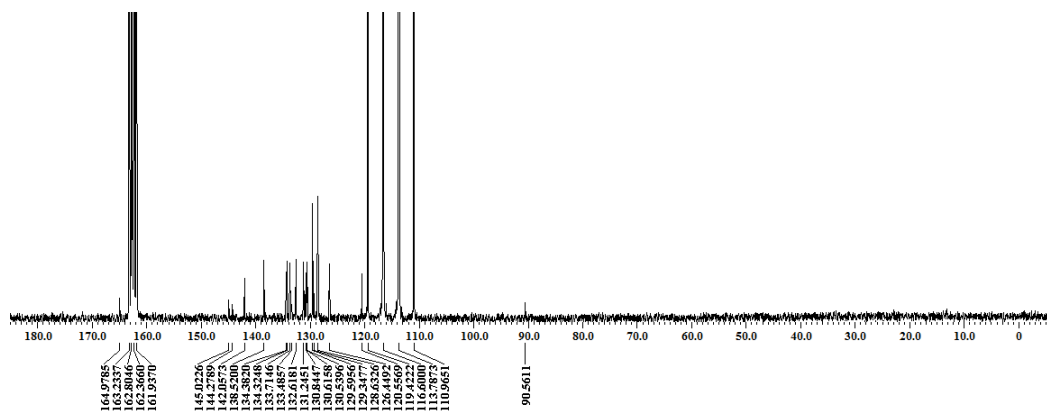

# HRMS



## 6-Iodo-5-phenylbenzo[*a*]phenazine (5q)

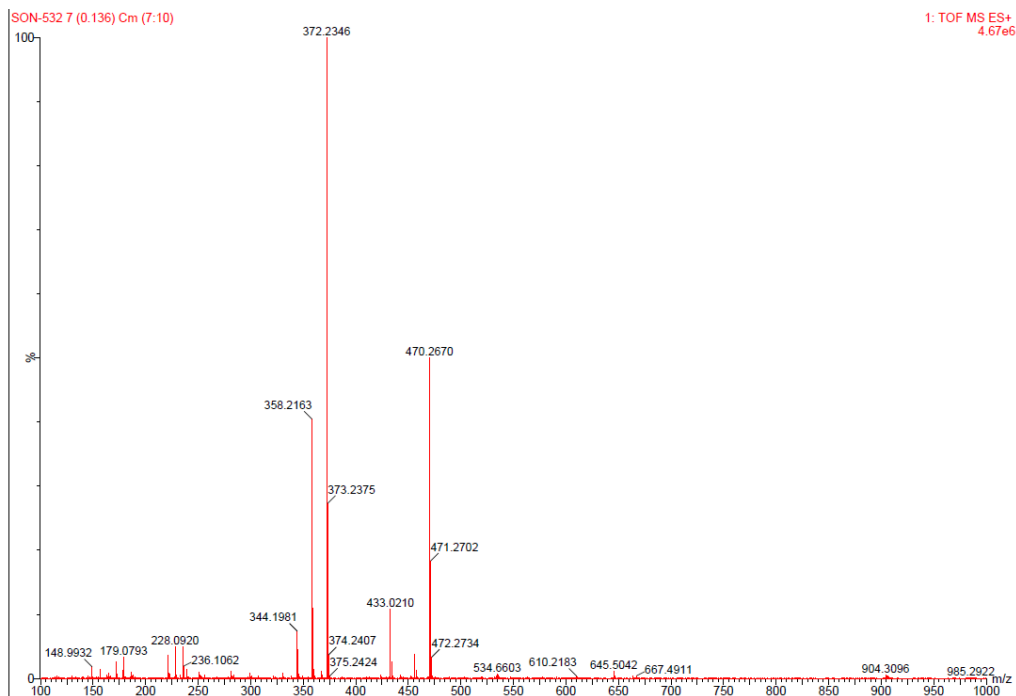

<sup>1</sup>H NMR

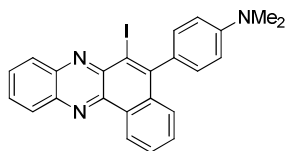

4-(6-Iodobenzo[*a*]phenazin-5-yl)-*N,N*-dimethylaniline (5r)

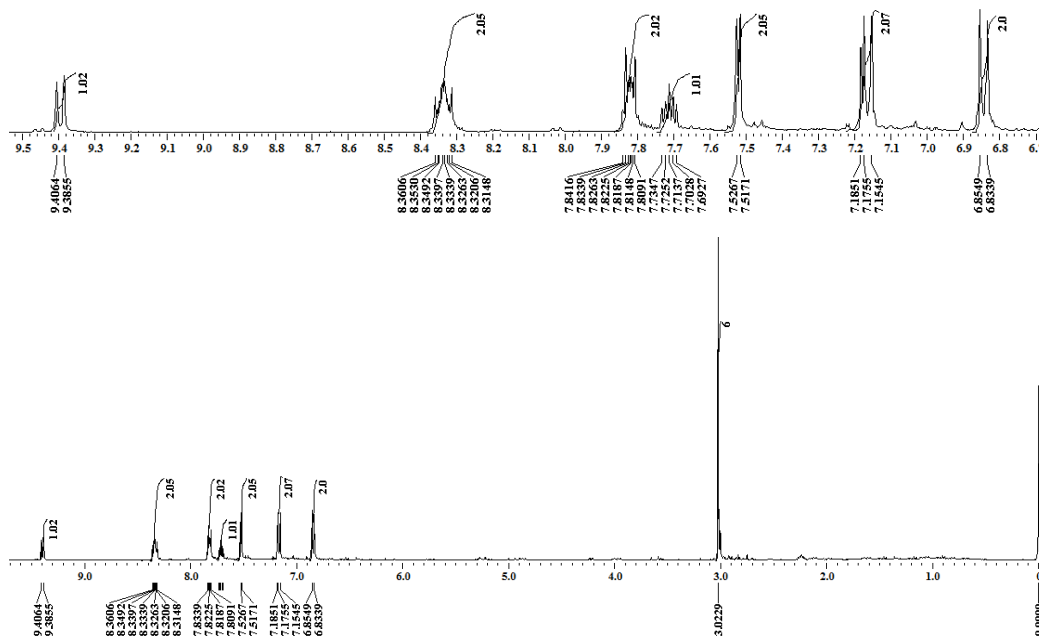

$^{13}\text{C}\{^1\text{H}\}$  NMR

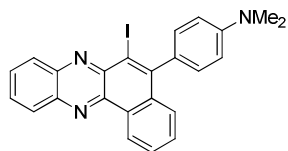

4-(6-Iodobenzo[*a*]phenazin-5-yl)-*N,N*-dimethylaniline (5r)

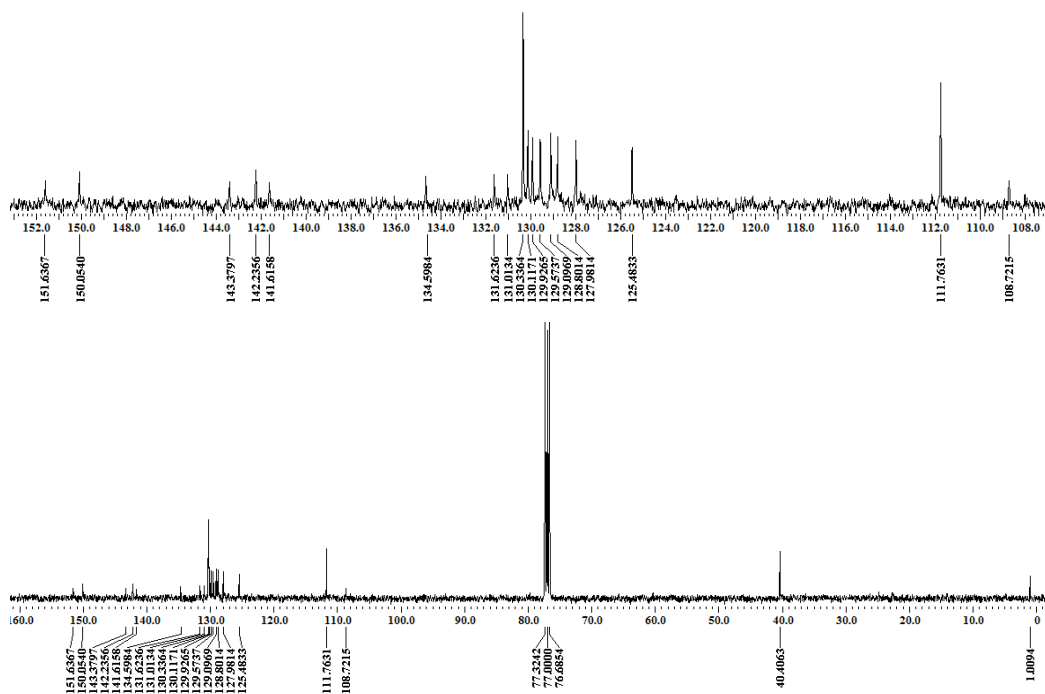

# HRMS

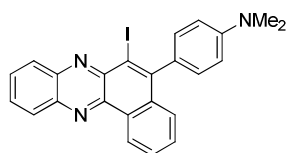

## 4-(6-Iodobenzo[*a*]phenazin-5-yl)-N,N-dimethylaniline (5r)

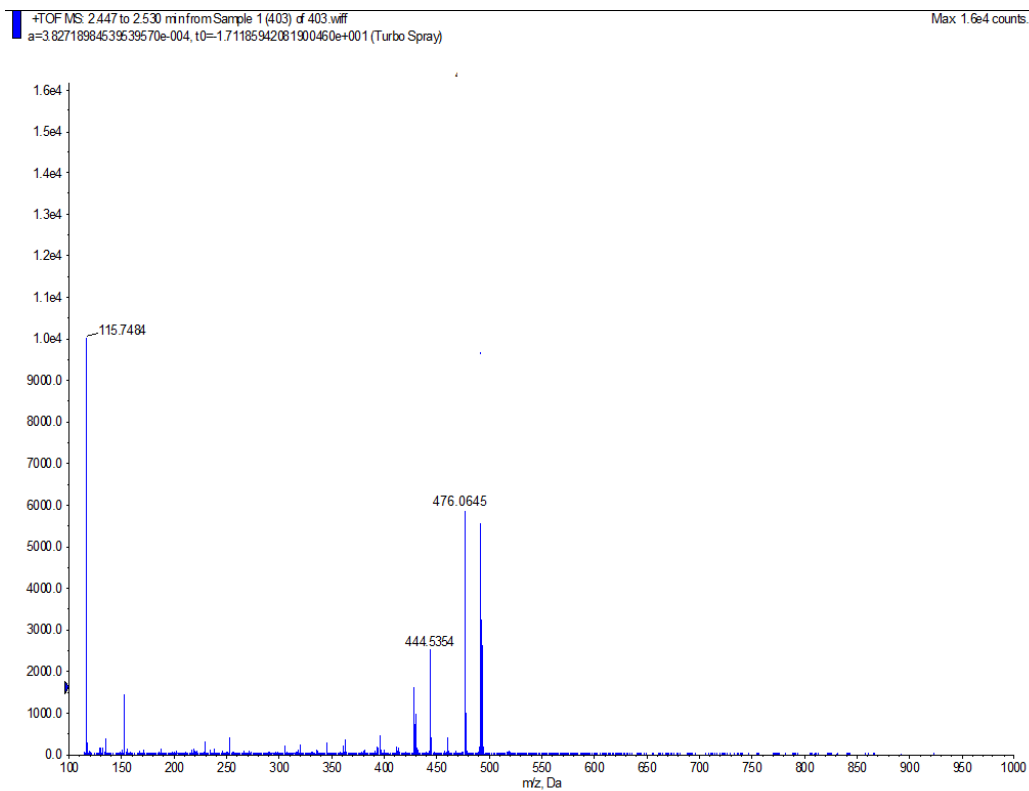



# <sup>1</sup>H NMR

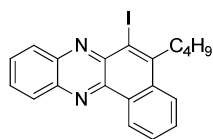

5-Butyl-6-iodobenzo[*a*]phenazine (5s)

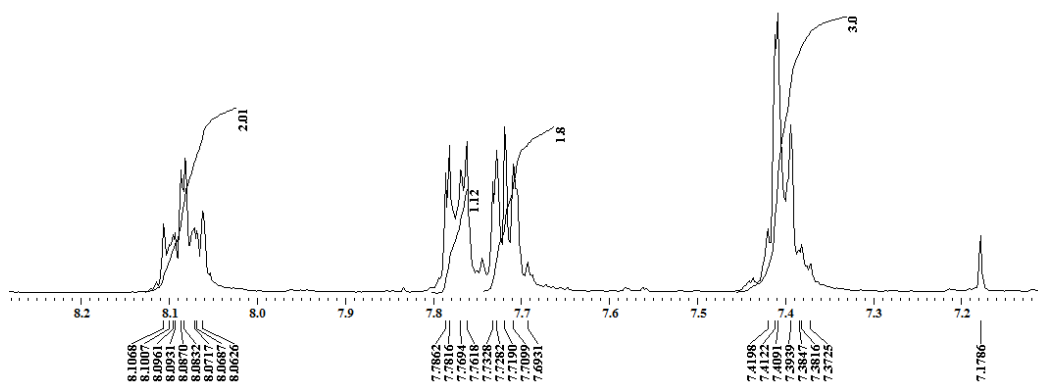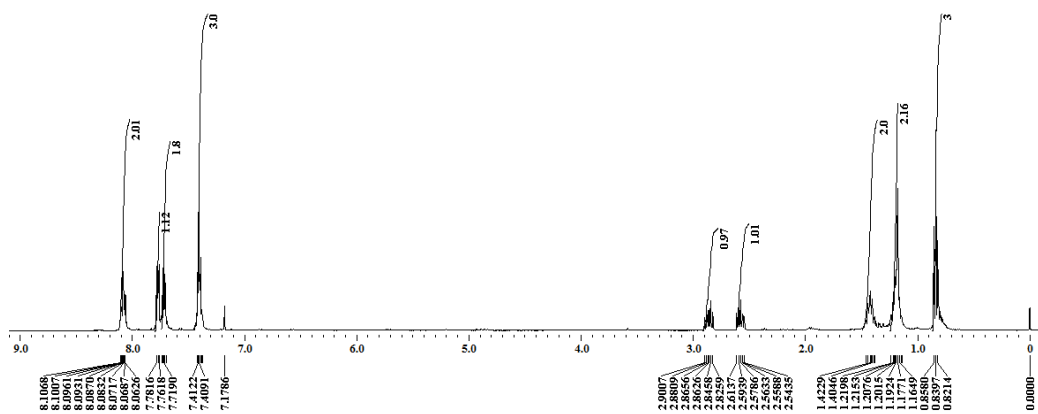

$^{13}\text{C}\{^1\text{H}\}$  NMR

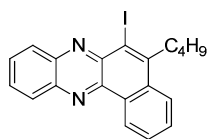

5-Butyl-6-iodobenzo[a]phenazine (5s)

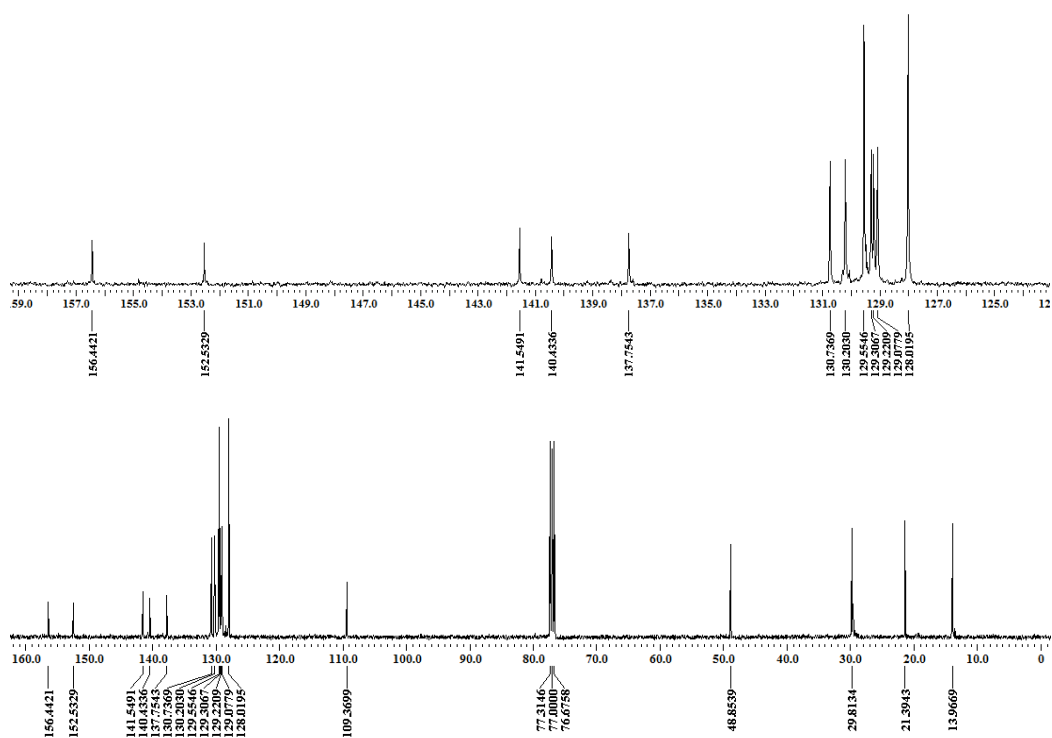

# HRMS

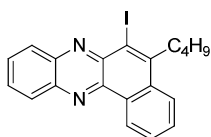

## 5-Butyl-6-iodobenzo[a]phenazine (5s)

### Qualitative Compound Report

|                        |              |               |                     |
|------------------------|--------------|---------------|---------------------|
| Data File              | SON-536.d    | Sample Name   | SON-536             |
| Sample Type            | Sample       | Position      | P1-E4               |
| Instrument Name        | Instrument 1 | User Name     |                     |
| Acq Method             | 29.10.2014.m | Acquired Time | 08-11-2016 12:24:42 |
| IRM Calibration Status | Success      | DA Method     | Default.m           |
| Comment                |              |               |                     |

|                |                             |       |
|----------------|-----------------------------|-------|
| Sample Group   |                             | Info. |
| Acquisition SW | 6200 series TOF/6500 series |       |
| Version        | Q-TOF B.05.01 (BS125)       |       |

#### Compound Table

| Compound Label      | RT | Mass    | Formula      | MFG Formula  | MFG Diff (ppm) | DB Formula   |
|---------------------|----|---------|--------------|--------------|----------------|--------------|
| Cpd 1: C20 H17 I N2 | 11 | 412.043 | C20 H17 I N2 | C20 H17 I N2 | 1.55           | C20 H17 I N2 |

| Compound Label      | m/z      | RT | Algorithm                 | Mass    |
|---------------------|----------|----|---------------------------|---------|
| Cpd 1: C20 H17 I N2 | 413.0503 | 11 | Find by Molecular Feature | 412.043 |

#### MFE MS Spectrum

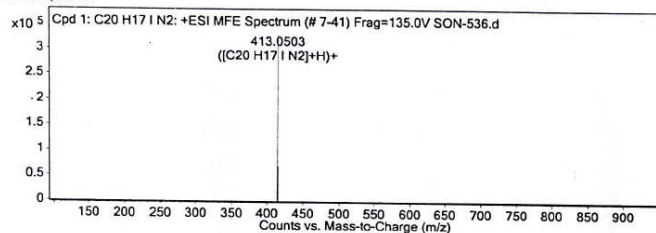

#### MFE MS Zoomed Spectrum

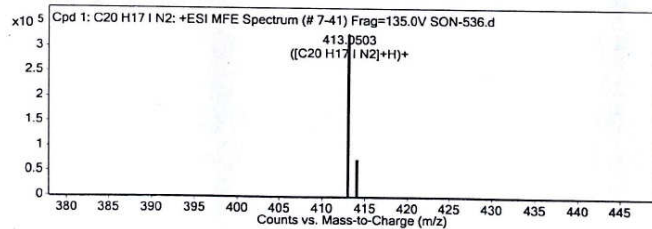

#### MS Spectrum Peak List

| m/z      | z | Abund     | Formula      | Ion    |
|----------|---|-----------|--------------|--------|
| 413.0503 | 1 | 327969.75 | C20 H17 I N2 | (M+H)+ |
| 414.0533 | 1 | 69269.71  | C20 H17 I N2 | (M+H)+ |

--- End Of Report ---

<sup>1</sup>H NMR

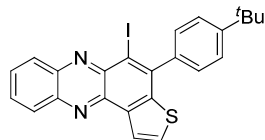

4-(4-(*tert*-Butyl)phenyl)-5-iodothieno[3,2-*a*]phenazine (5t)

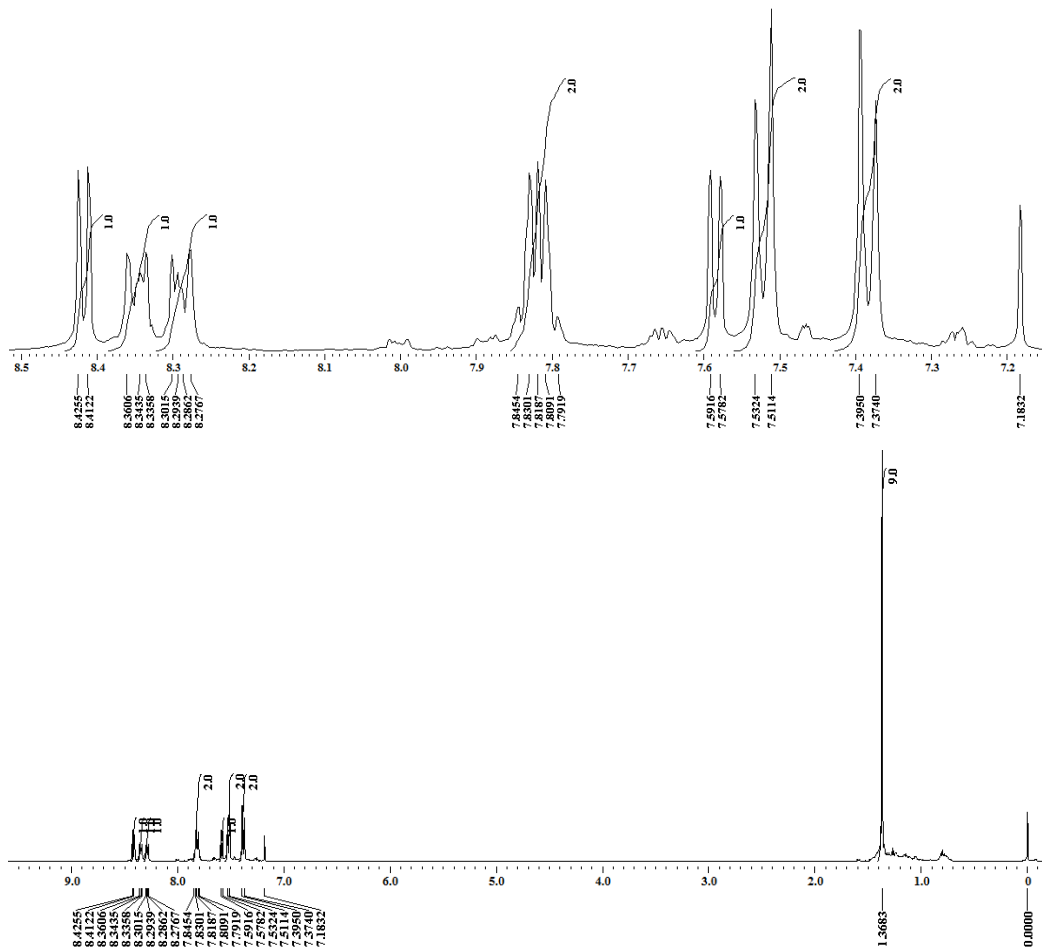

$^{13}\text{C}\{^1\text{H}\}$  NMR

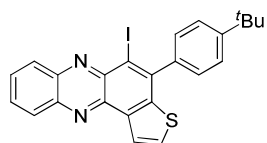

4-(4-(*tert*-Butyl)phenyl)-5-iodothieno[3,2-*a*]phenazine (5t)

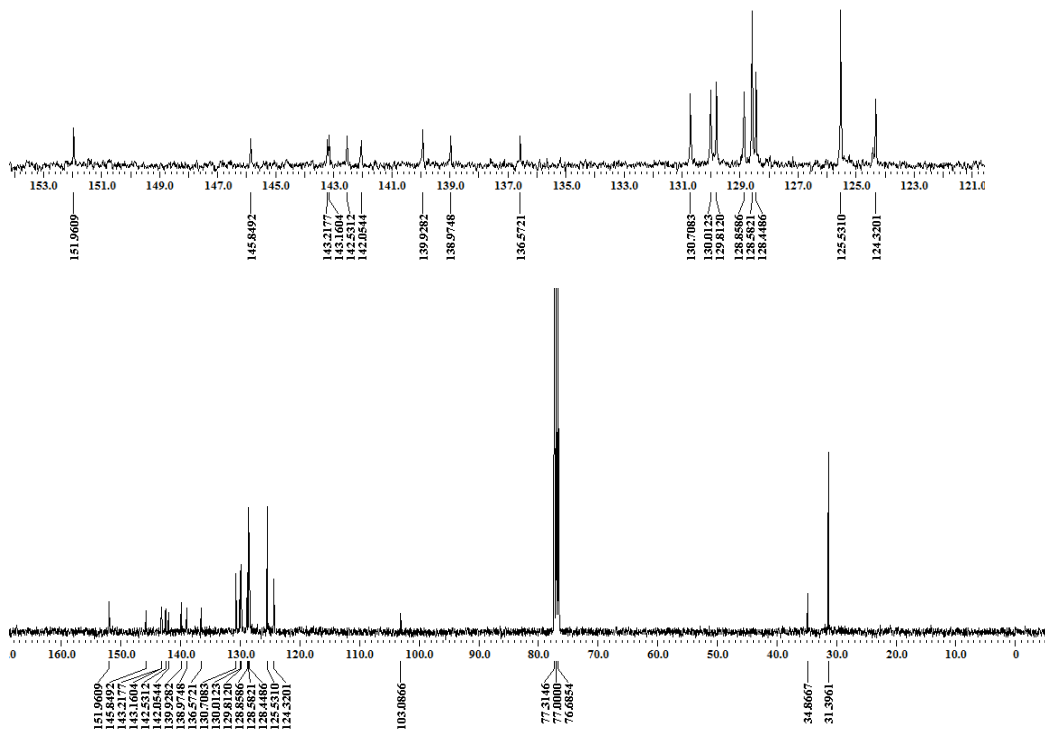

## HRMS

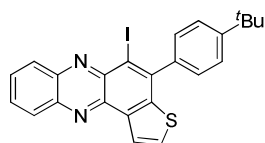

**4-(4-(*tert*-Butyl)phenyl)-5-iodothieno[3,2-*a*]phenazine (5t)**

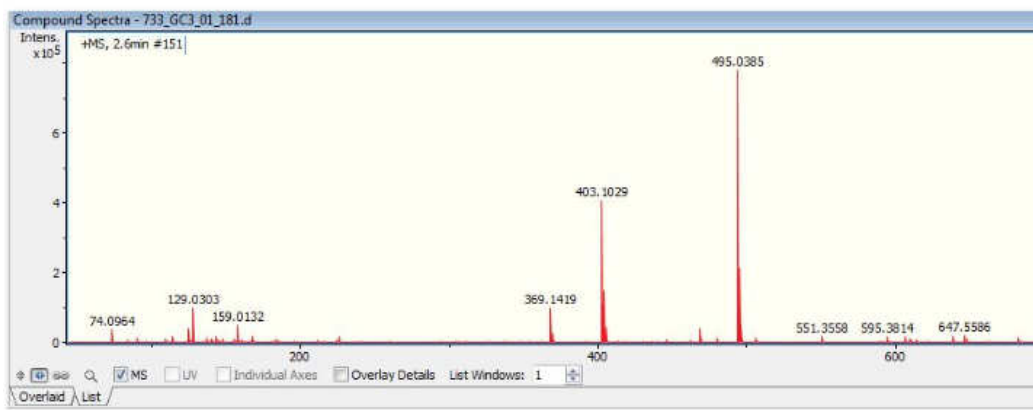

# $^1\text{H}$ NMR

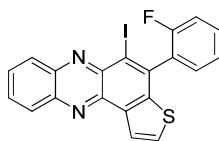

4-(2-Fluorophenyl)-5-iodothieno[3,2-a]phenazine (5u)

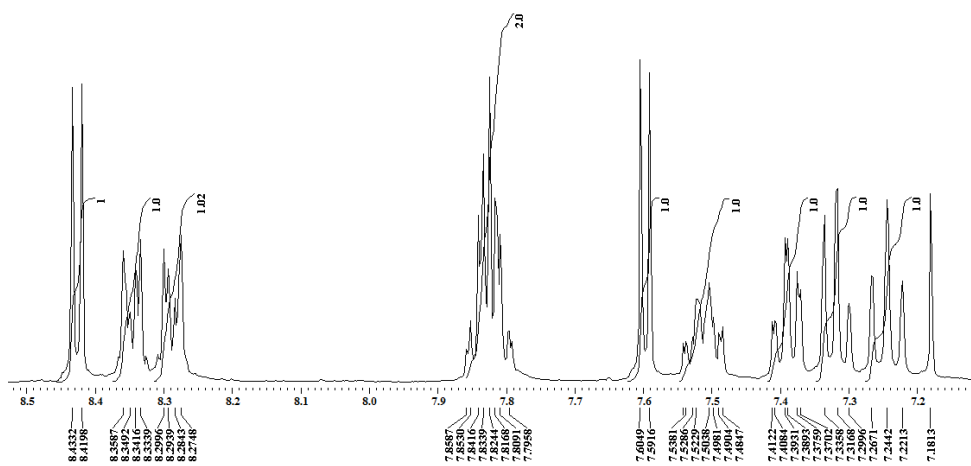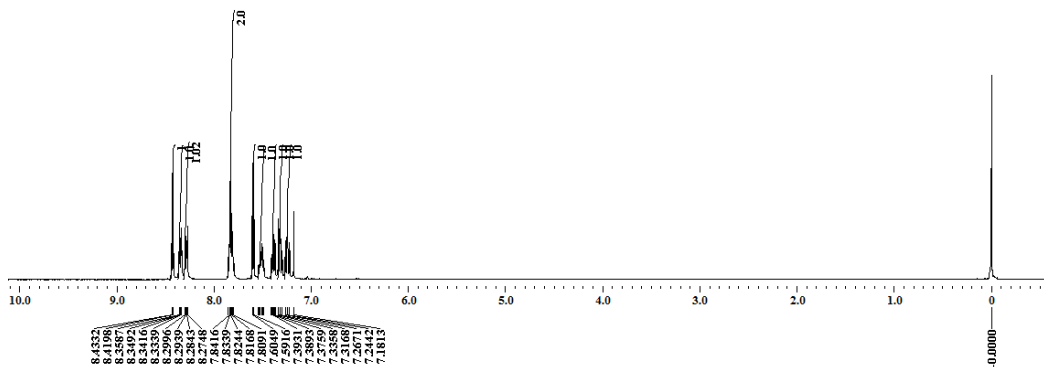

$^{13}\text{C}\{^1\text{H}\}$  NMR

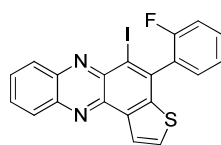

4-(2-Fluorophenyl)-5-iodothieno[3,2-a]phenazine (5u)

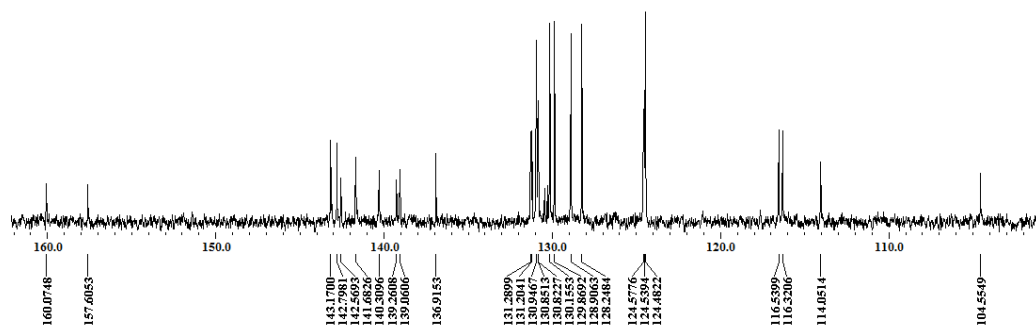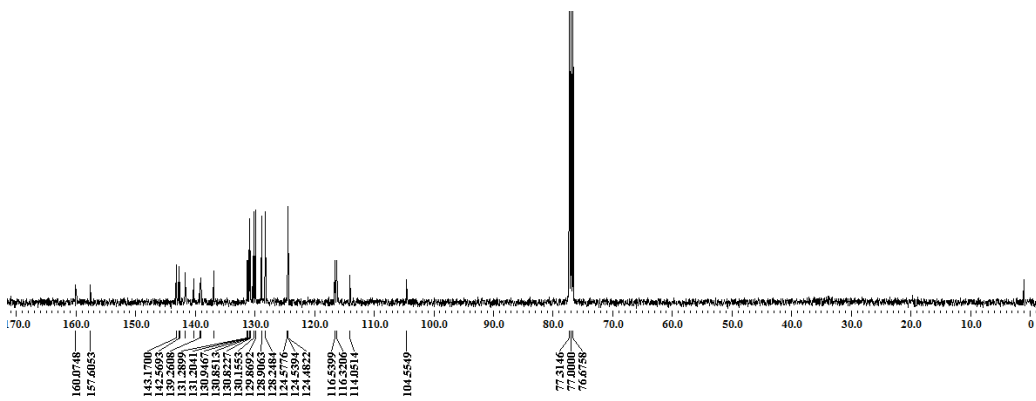



# HRMS

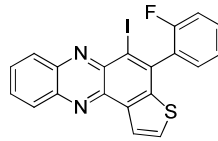

## 4-(2-Fluorophenyl)-5-iodothieno[3,2-a]phenazine (5u)

### Qualitative Compound Report

|                        |              |               |                     |
|------------------------|--------------|---------------|---------------------|
| Data File              | SON 772.d    | Sample Name   | SON 772             |
| Sample Type            | Sample       | Position      | P1-A3               |
| Instrument Name        | Instrument 1 | User Name     | SMILY               |
| Acq Method             | 29.10.2014.m | Acquired Time | 28-09-2015 12:35:47 |
| IRM Calibration Status | Success      | DA Method     | Default.m           |
| Comment                |              |               |                     |

|                |                             |
|----------------|-----------------------------|
| Sample Group   | Info.                       |
| Acquisition SW | 6200 series TOF/6500 series |
| Version        | Q-TOF B.05.01 (B5125)       |

| Compound Label        | RT | Mass     | Formula        | MFG Formula    | MFG Diff (ppm) | DB Formula     |
|-----------------------|----|----------|----------------|----------------|----------------|----------------|
| Cpd 7: C20 H11 F N2 S | 11 | 330.0633 | C20 H11 F N2 S | C20 H11 F N2 S | -1.83          | C20 H11 F N2 S |

| Compound Label        | m/z      | RT | Algorithm                 | Mass     |
|-----------------------|----------|----|---------------------------|----------|
| Cpd 7: C20 H11 F N2 S | 331.0705 | 11 | Find by Molecular Feature | 330.0633 |

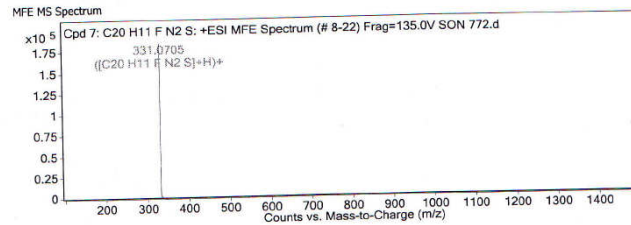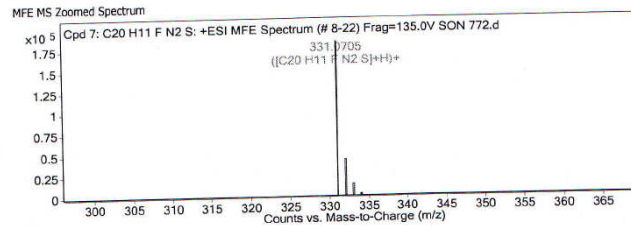

| m/z      | z | Abund    | Formula        | Ion    |
|----------|---|----------|----------------|--------|
| 331.0705 | 1 | 184856.3 | C20 H11 F N2 S | (M+H)+ |
| 332.0734 | 1 | 42994.79 | C20 H11 F N2 S | (M+H)+ |
| 333.0711 | 1 | 11522.01 | C20 H11 F N2 S | (M+H)+ |
| 334.0727 | 1 | 2266.18  | C20 H11 F N2 S | (M+H)+ |
| 335.0731 | 1 | 262.54   | C20 H11 F N2 S | (M+H)+ |

--- End Of Report ---

<sup>1</sup>H NMR

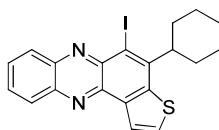

4-Cyclohexyl-5-iodothieno[3,2-*a*]phenazine (5v)

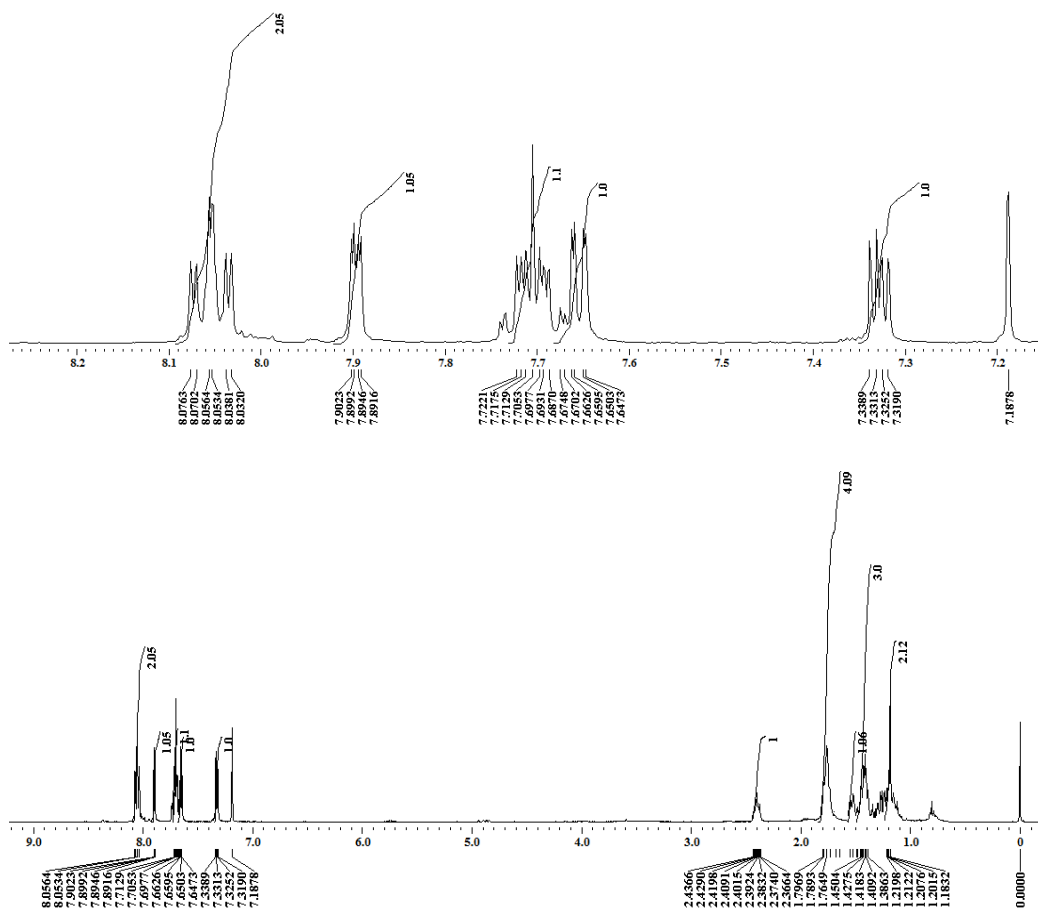

$^{13}\text{C}\{^1\text{H}\}$  NMR

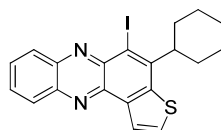

4-Cyclohexyl-5-iodothieno[3,2-*a*]phenazine (5v)

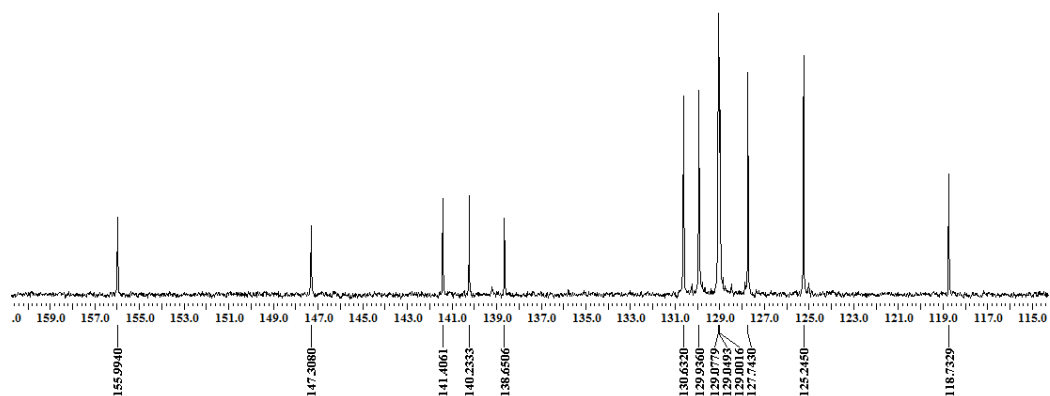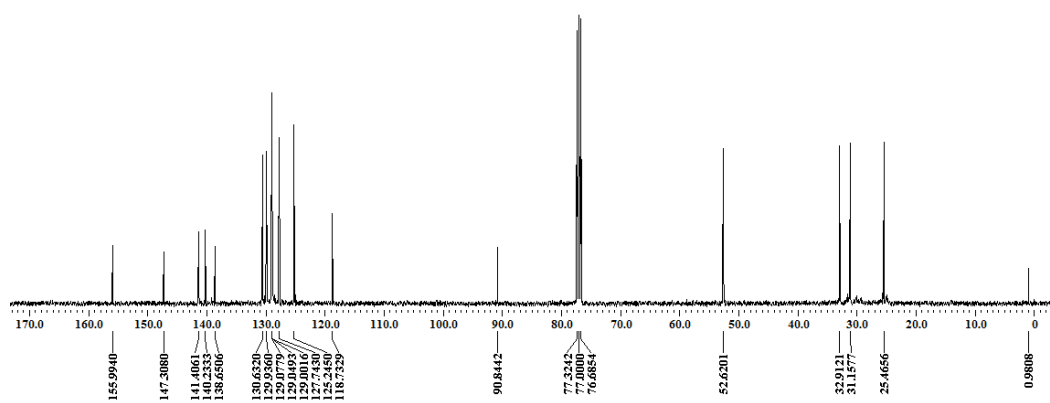

# HRMS

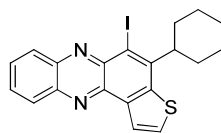

**4-Cyclohexyl-5-iodothieno[3,2-*a*]phenazine (5v)**

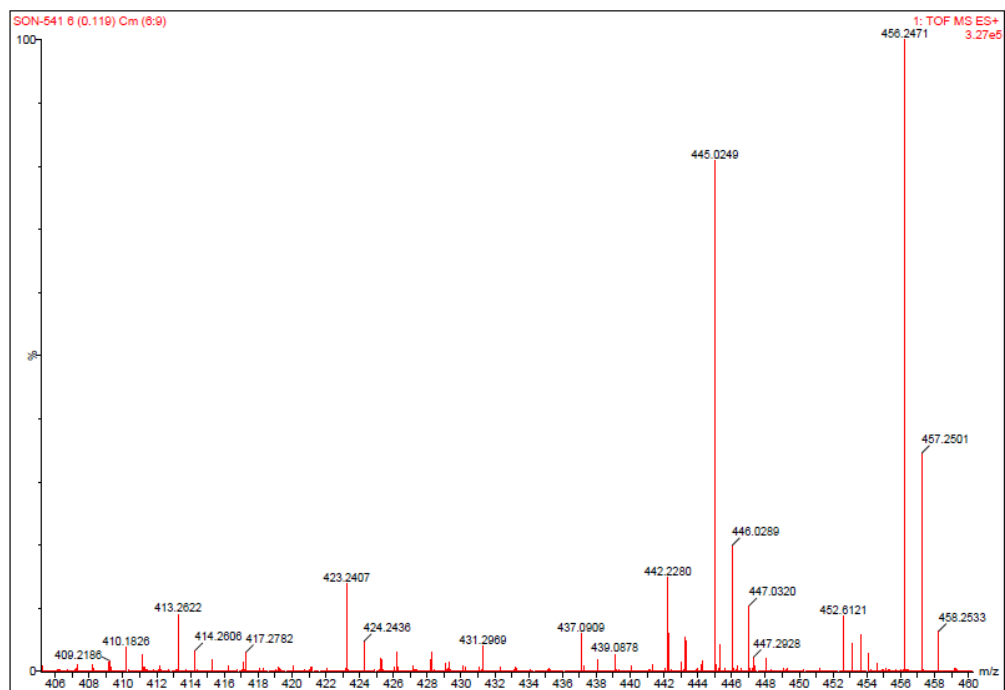

# <sup>1</sup>H NMR

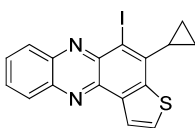

4-Cyclopropyl-5-iodothieno[3,2-a]phenazine (5w)

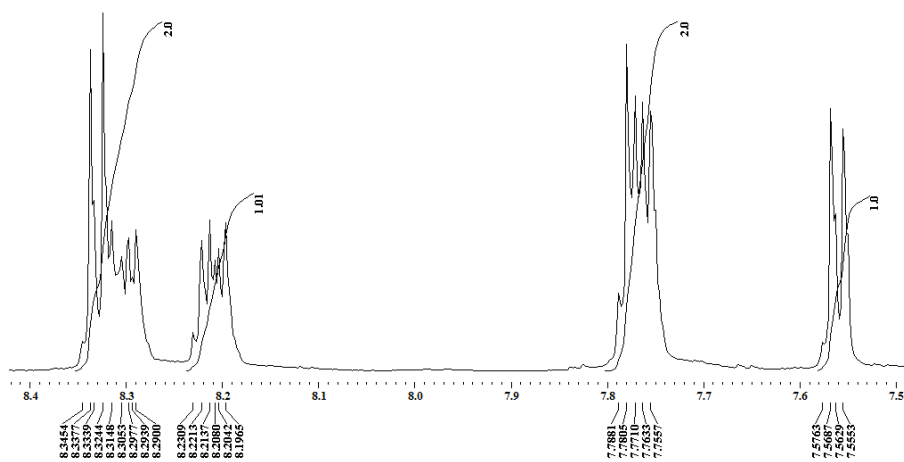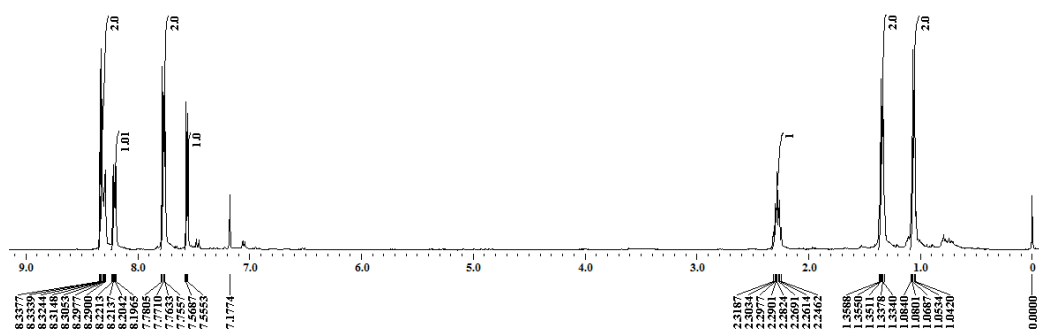

$^{13}\text{C}\{^1\text{H}\}$  NMR

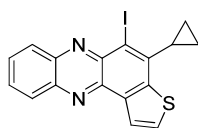

4-Cyclopropyl-5-iodothieno[3,2-a]phenazine (5w)

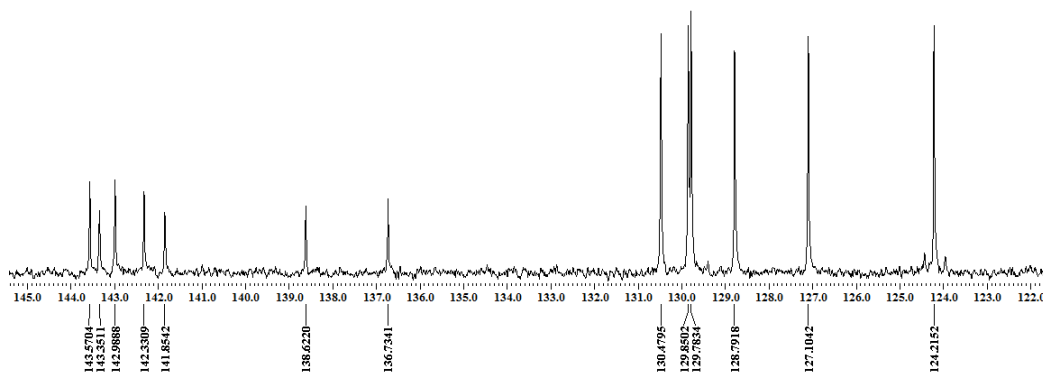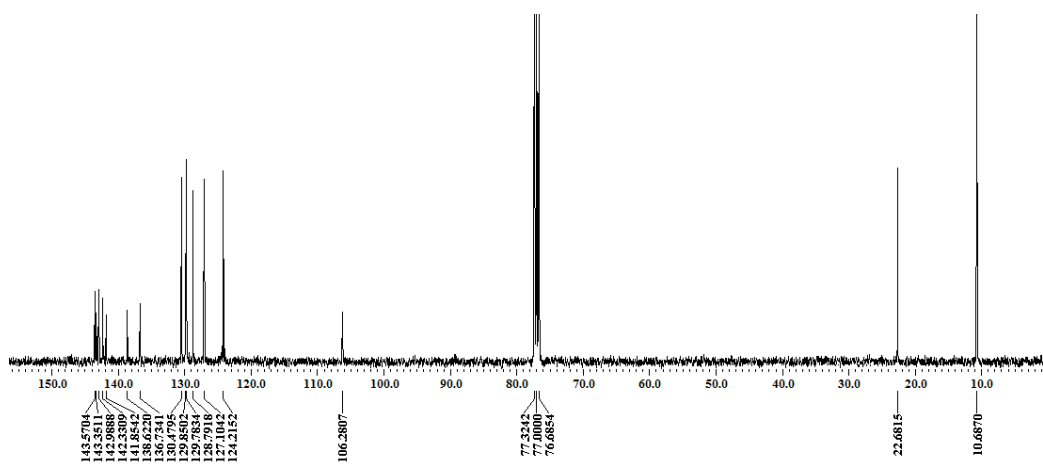

HRMS

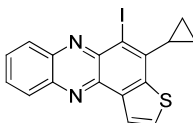

4-Cyclopropyl-5-iodothieno[3,2-a]phenazine (5w)

Qualitative Compound Report

Data File: SON 807A.d  
 Sample Type: Sample  
 Instrument Name: Instrument 1  
 Acq Method: 29.10.2014.m  
 IRM Calibration Status: Success  
 Comment:  
 Sample Name: SON 807A  
 Position: P1-D3  
 User Name: SMILY  
 Acquired Time: 05-11-2015 14:32:44  
 DA Method: Default.m

Sample Group: Info.  
 Acquisition SW: 6200 series TOF/6500 series  
 Version: Q-TOF B.05.01 (B5125)

Compound Table

| Compound Label         | RT | Mass     | Formula        | MFG Formula    | MFG Diff (ppm) | DB Formula     |
|------------------------|----|----------|----------------|----------------|----------------|----------------|
| Cpd 22: C17 H11 I N2 S | 12 | 401.9688 | C17 H11 I N2 S | C17 H11 I N2 S | -0.1           | C17 H11 I N2 S |

| Compound Label         | m/z     | RT | Algorithm                 | Mass     |
|------------------------|---------|----|---------------------------|----------|
| Cpd 22: C17 H11 I N2 S | 402.976 | 12 | Find by Molecular Feature | 401.9688 |

MFE MS Spectrum

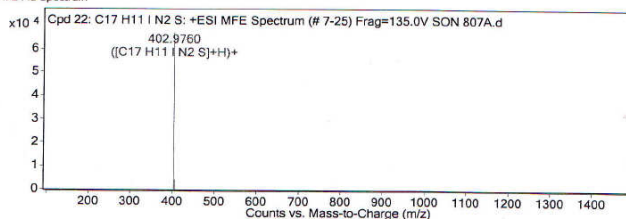

MFE MS Zoomed Spectrum

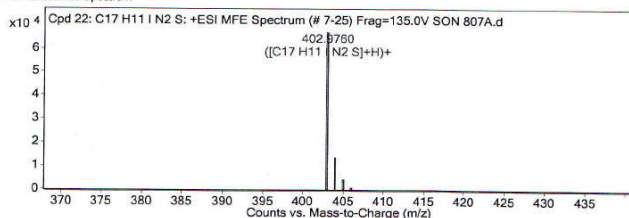

MS Spectrum Peak List

| m/z      | z | Abund    | Formula        | Ion    |
|----------|---|----------|----------------|--------|
| 402.976  | 1 | 67112.62 | C17 H11 I N2 S | (M+H)+ |
| 403.9791 | 1 | 13464.91 | C17 H11 I N2 S | (M+H)+ |
| 404.9758 | 1 | 4244.01  | C17 H11 I N2 S | (M+H)+ |
| 405.9746 | 1 | 752.08   | C17 H11 I N2 S | (M+H)+ |

--- End Of Report ---

# <sup>1</sup>H NMR

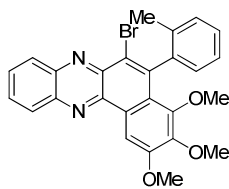

6-Bromo-2,3,4-trimethoxy-5-(*o*-tolyl)benzo[*a*]phenazine (5x)

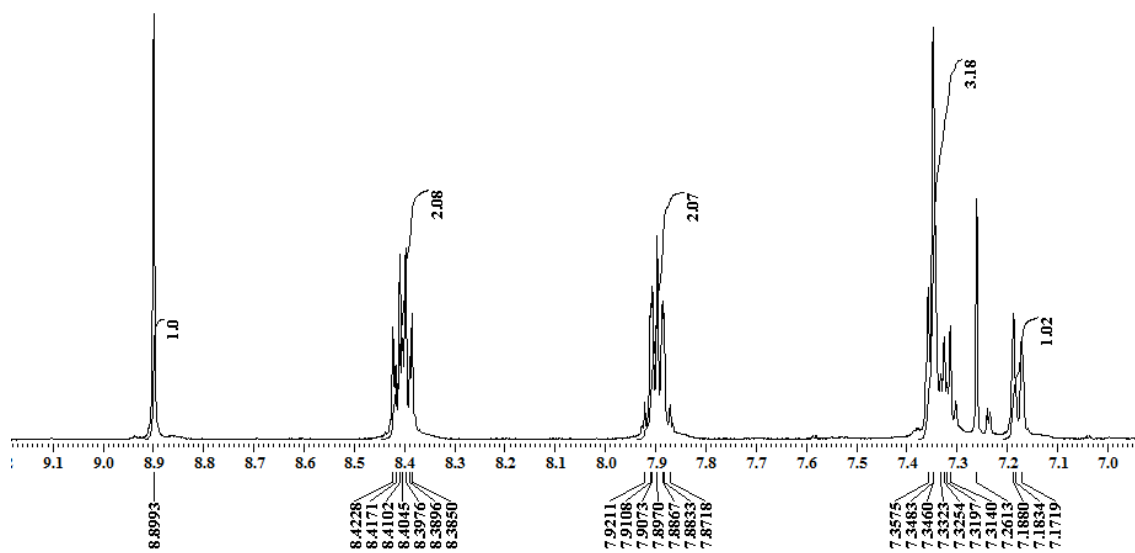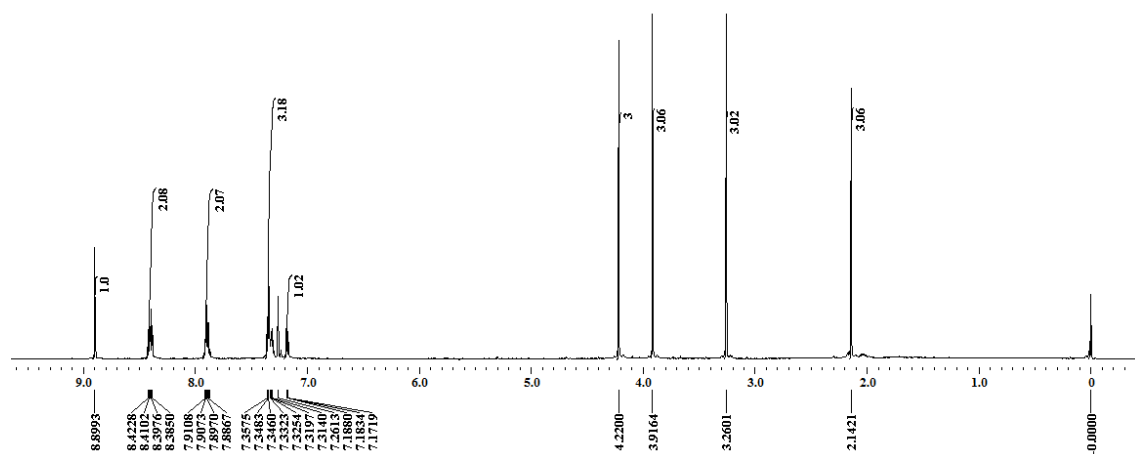



$^{13}\text{C}\{^1\text{H}\}$  NMR

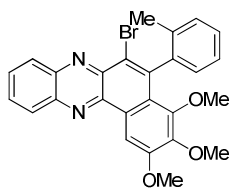

6-Bromo-2,3,4-trimethoxy-5-(*o*-tolyl)benzo[*a*]phenazine (5x)

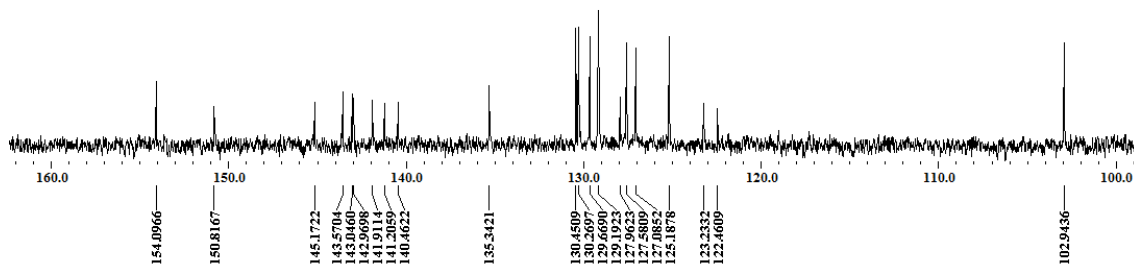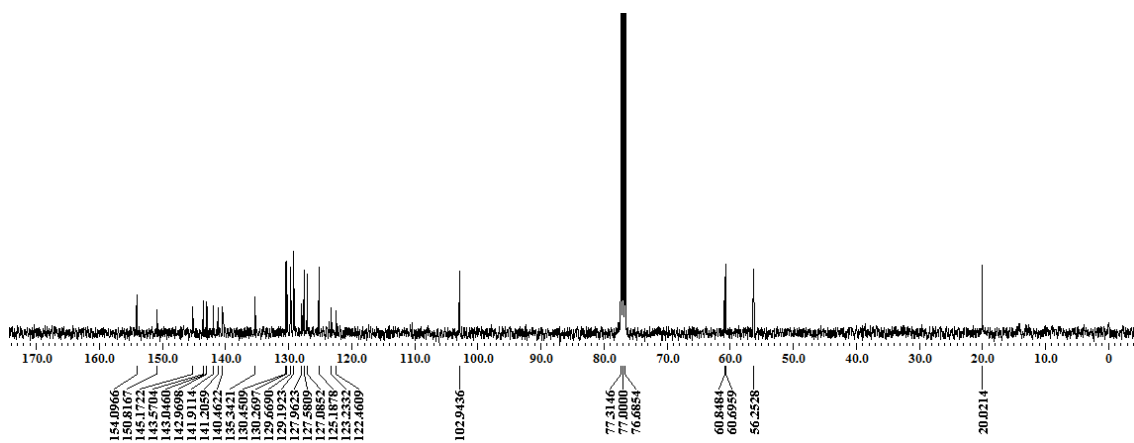

# HRMS

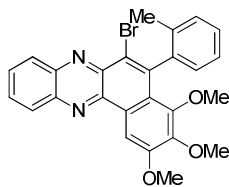

6-Bromo-2,3,4-trimethoxy-5-(*o*-tolyl)benzo[*a*]phenazine (5x)

| Sample Name   | SON-956   | Position    | P1-B1        | Instrument Name | Instrument 1 | User Name              |                     |
|---------------|-----------|-------------|--------------|-----------------|--------------|------------------------|---------------------|
| Inj Vol       | 1         | InjPosition |              | SampleType      | Sample       | IRM Calibration Status | Success             |
| Data Filename | SON-956.d | ACQ Method  | 29.10.2014.m | Comment         |              | Acquired Time          | 27-04-2017 13:23:48 |

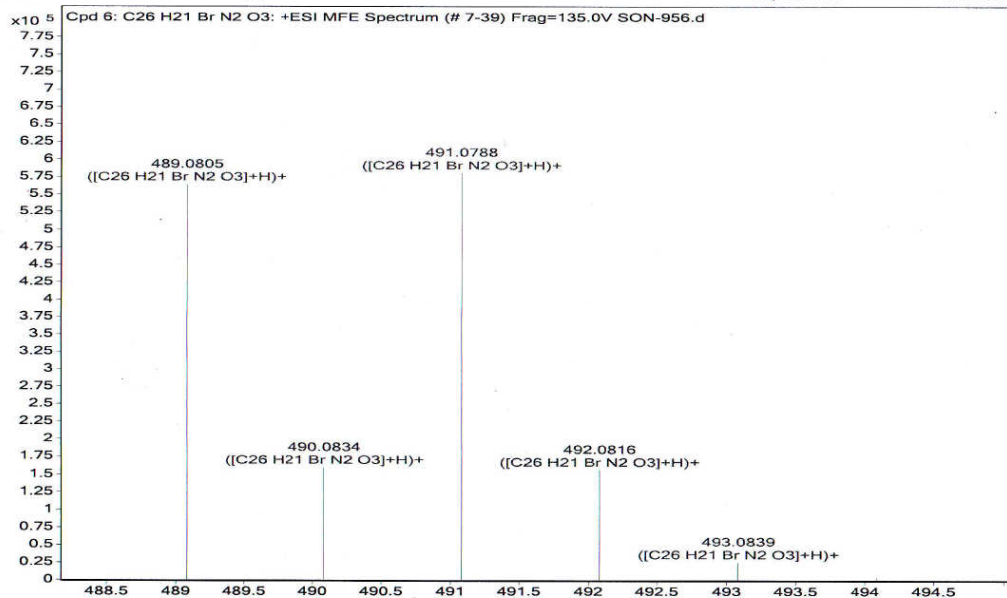

# <sup>1</sup>H NMR

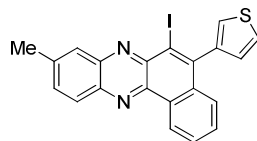

6-Iodo-9-methyl-5-(thiophen-3-yl)benzo[*a*]phenazine (7a)

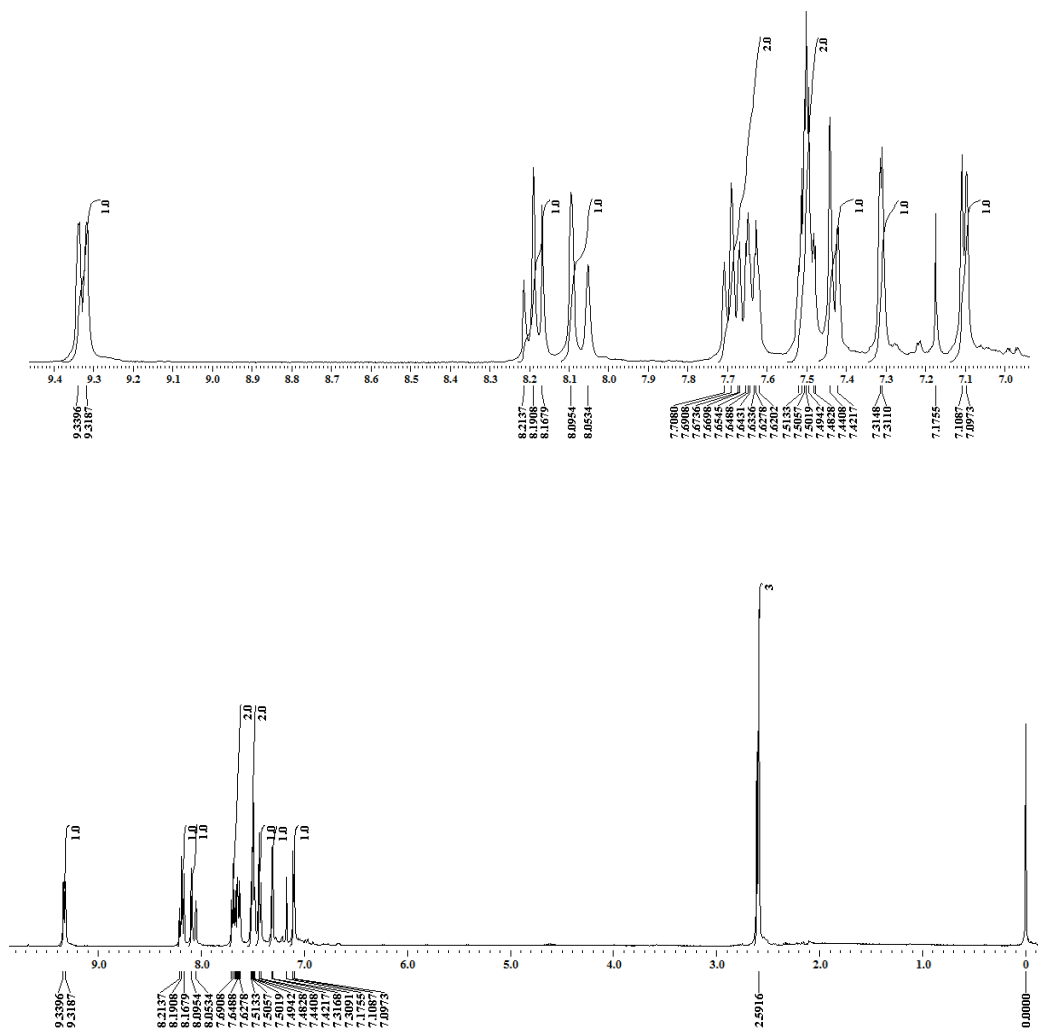

$^{13}\text{C}\{^1\text{H}\}$  NMR

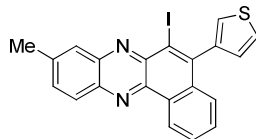

6-Iodo-9-methyl-5-(thiophen-3-yl)benzo[a]phenazine (7a)

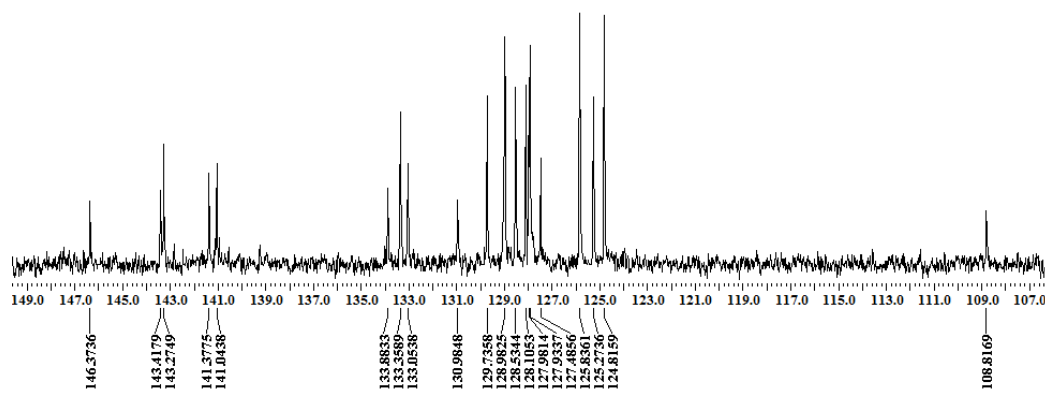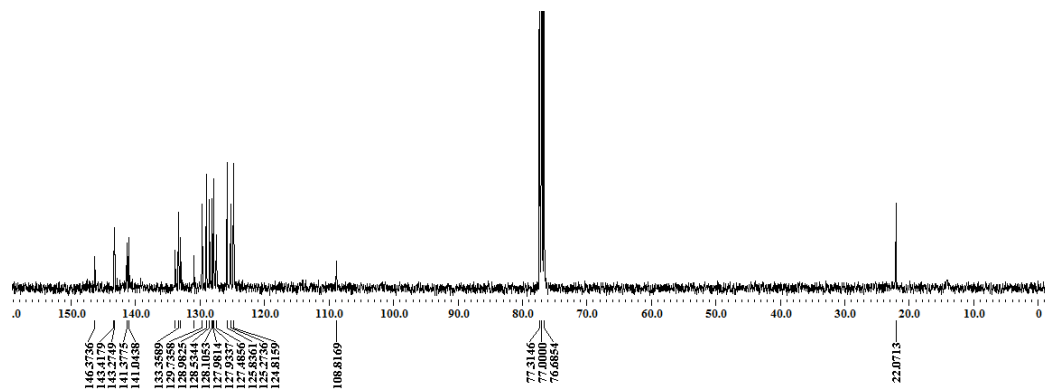

### HRMS

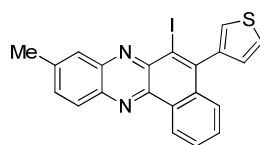

**6-Iodo-9-methyl-5-(thiophen-3-yl)benzo[a]phenazine (7a)**

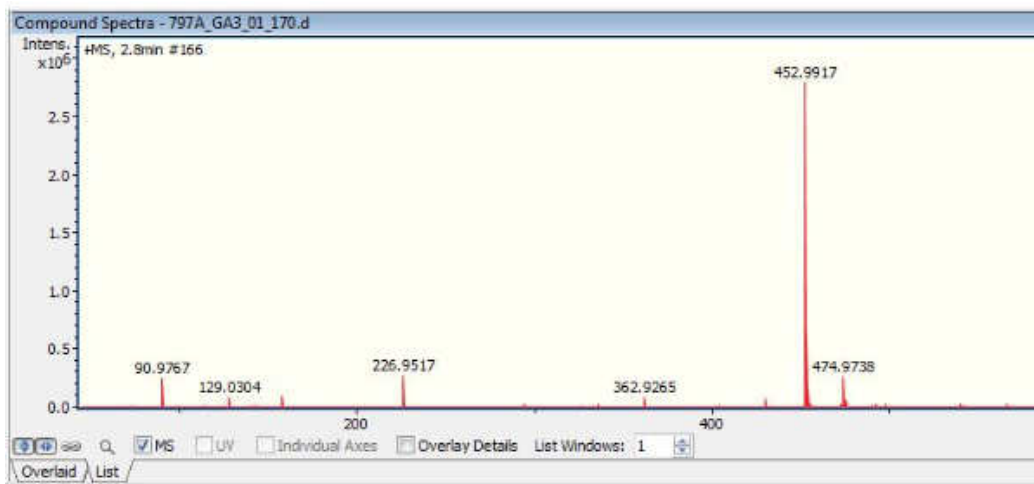

# <sup>1</sup>H NMR

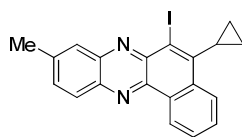

5-Cyclopropyl-6-iodo-9-methylbenzo[*a*]phenazine (7b)

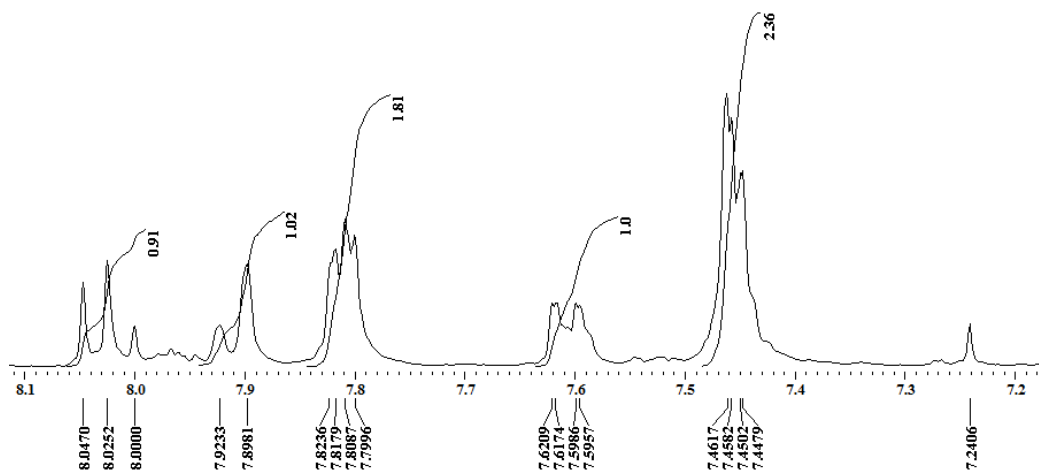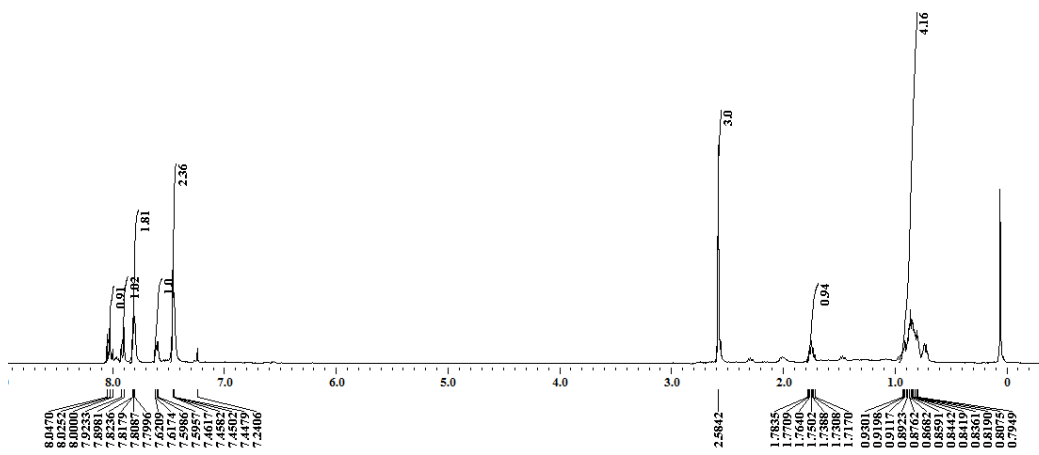

$^{13}\text{C}\{^1\text{H}\}$  NMR

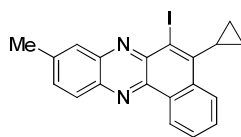

5-Cyclopropyl-6-iodo-9-methylbenzo[*a*]phenazine (7b)

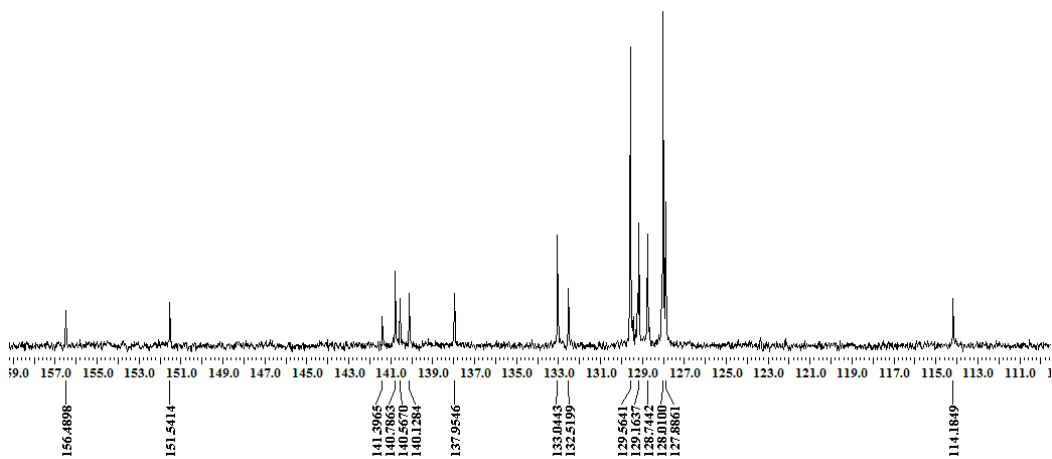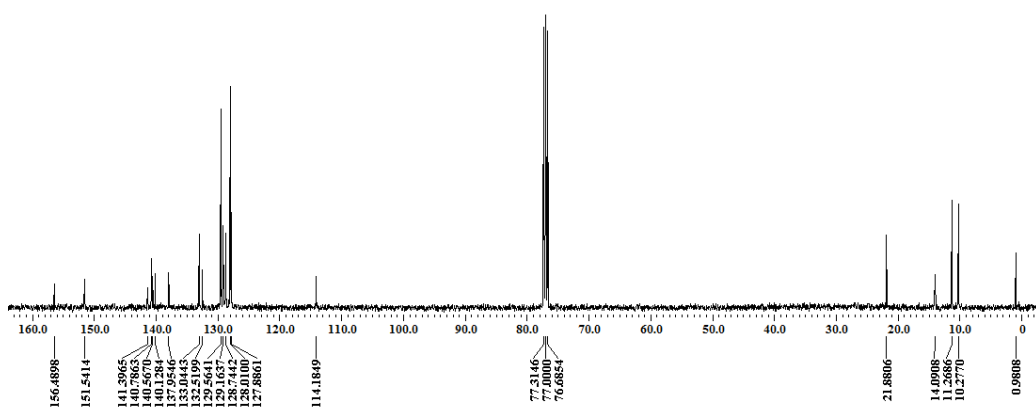

# HRMS

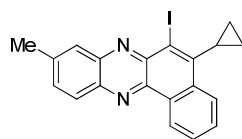

## 5-Cyclopropyl-6-iodo-9-methylbenzo[*a*]phenazine (7b)

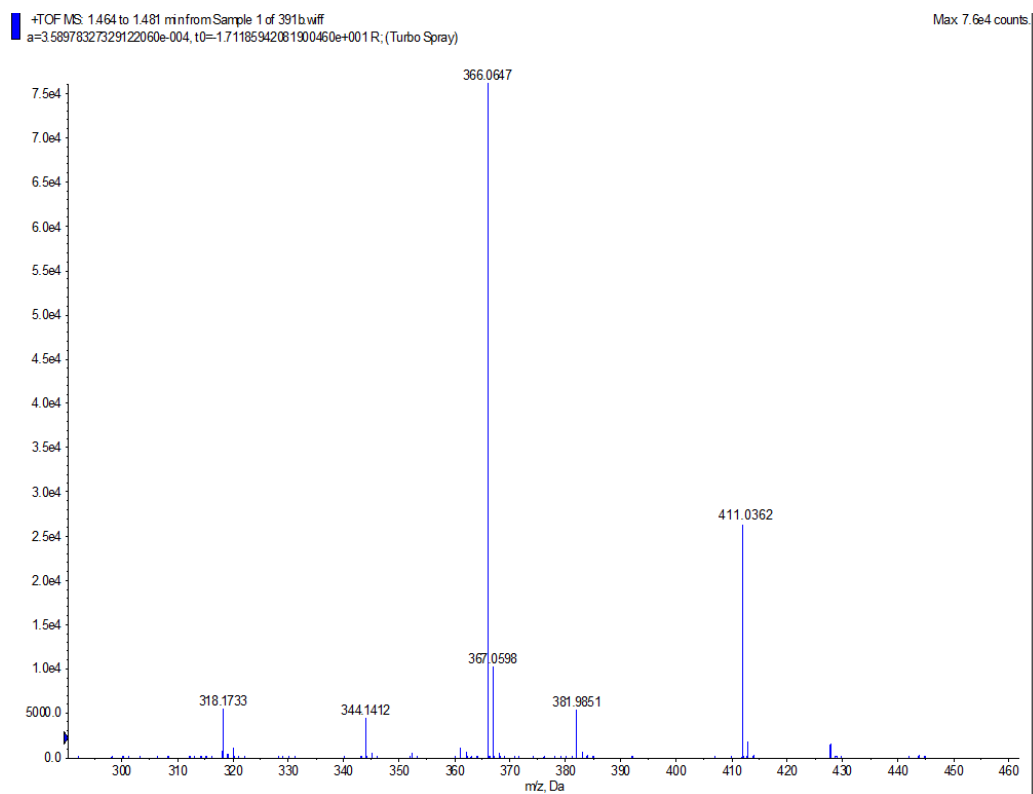



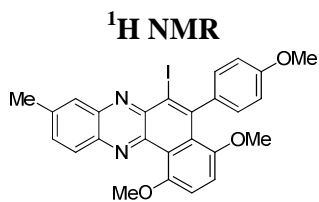

**6-iodo-1,4-dimethoxy-5-(4-methoxyphenyl)-9-methylbenzo[*a*]phenazine (7c)**

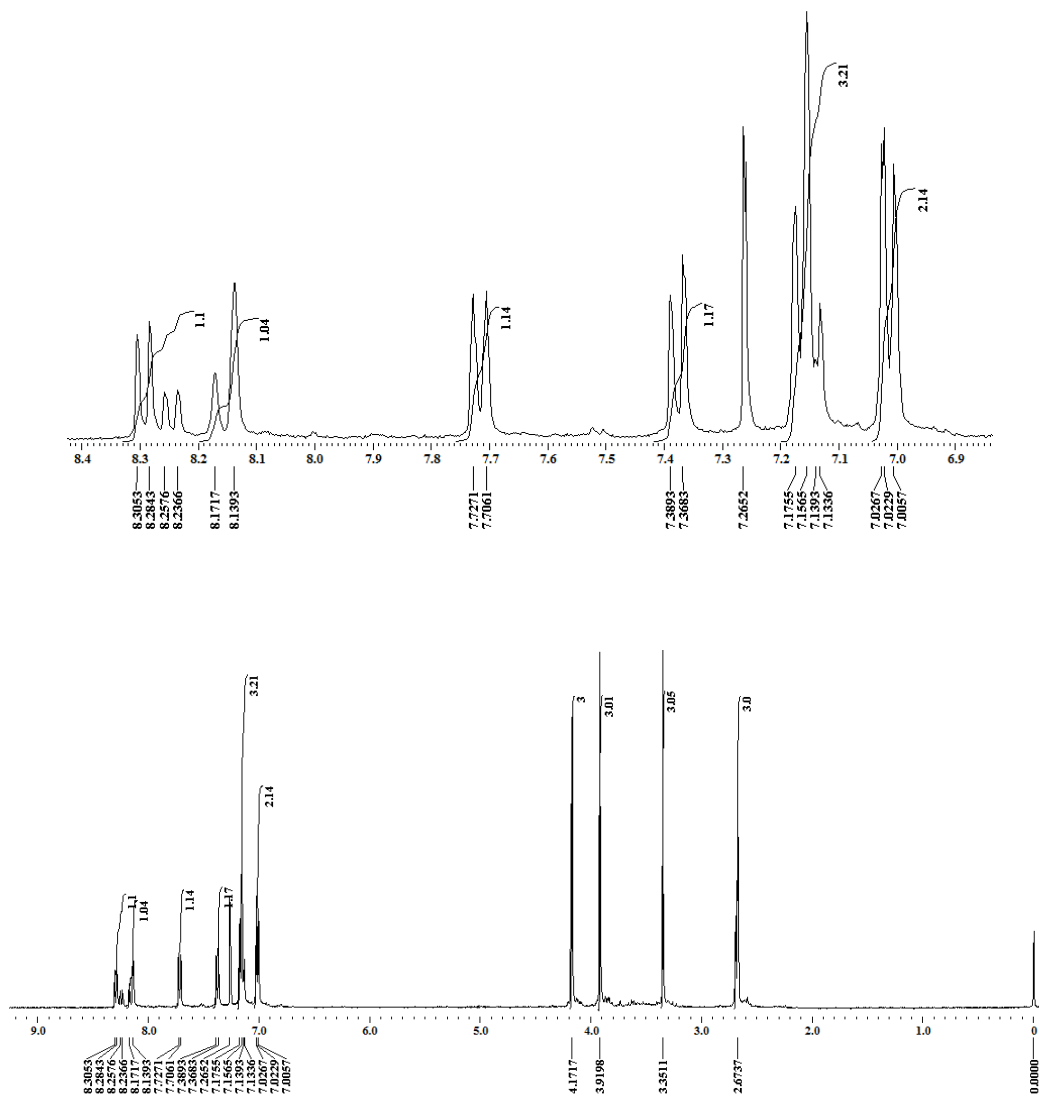

$^{13}\text{C}\{^1\text{H}\}$  NMR

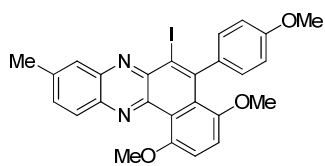

6-iodo-1,4-dimethoxy-5-(4-methoxyphenyl)-9-methylbenzo[a]phenazine (7c)

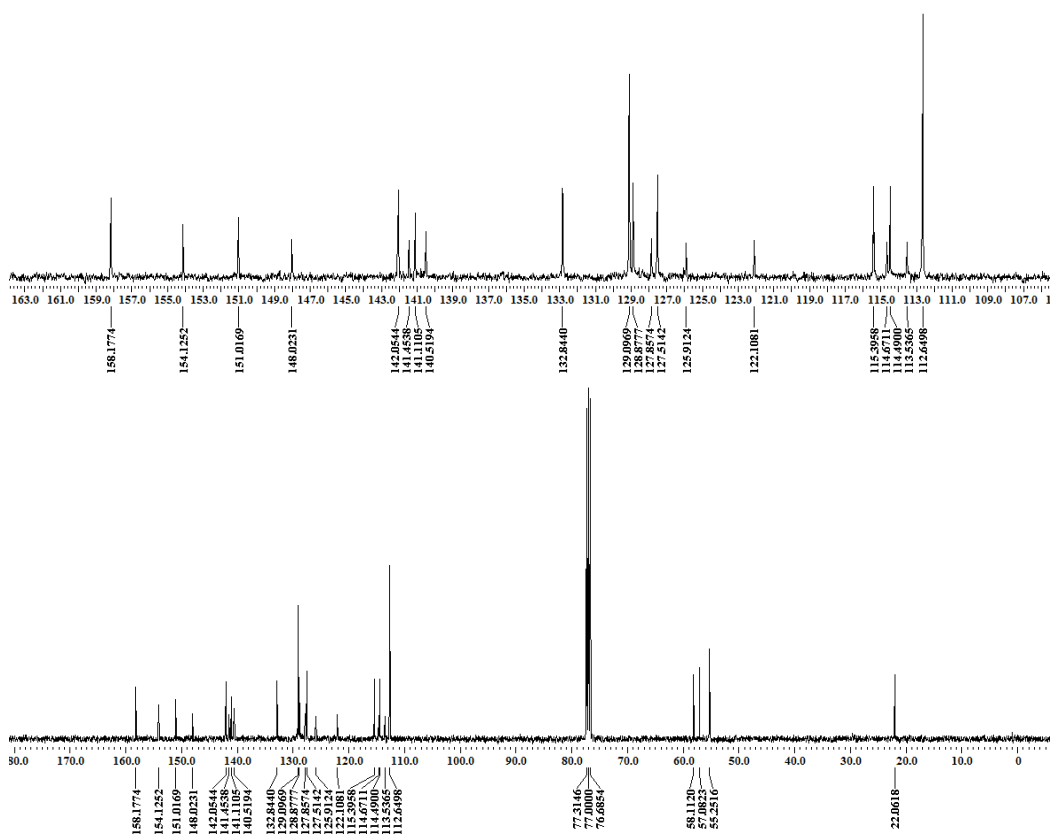

## HRMS



### 6-iodo-1,4-dimethoxy-5-(4-methoxyphenyl)-9-methylbenzo[a]phenazine (7c)

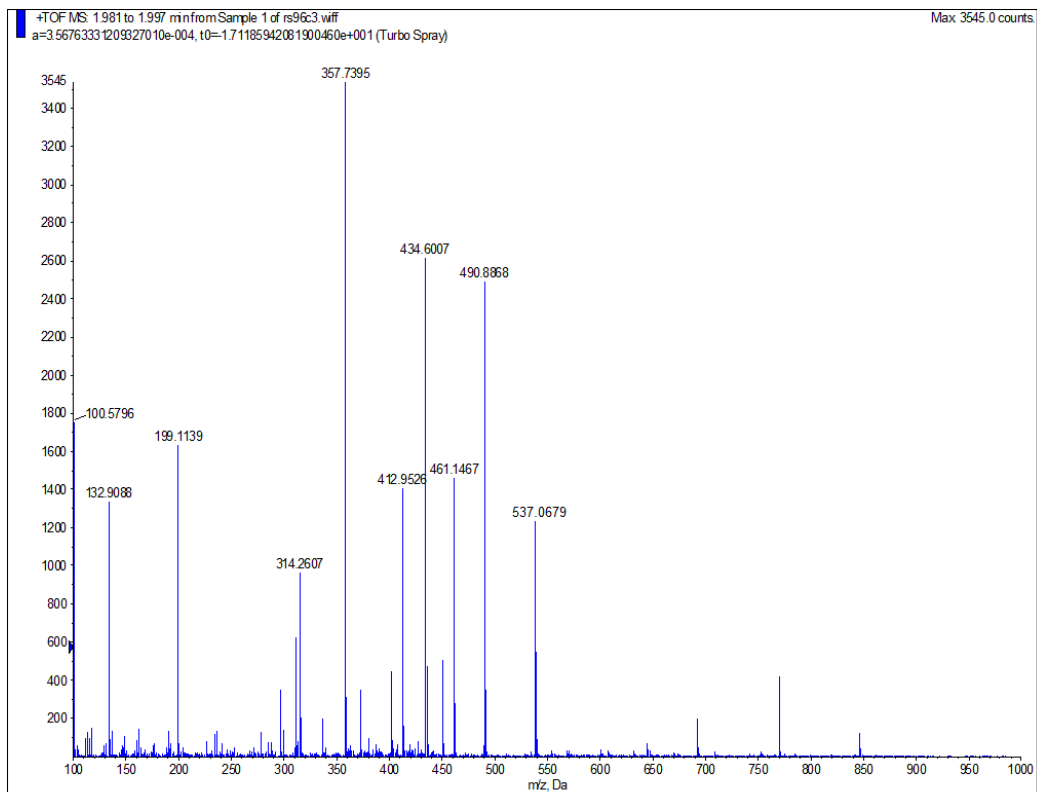

# <sup>1</sup>H NMR

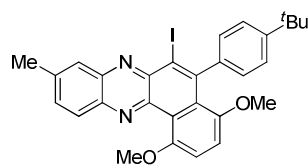

5-(4-(*tert*-Butyl)phenyl)-6-iodo-1,4-dimethoxy-9-methylbenzo[*a*]phenazine (7d)

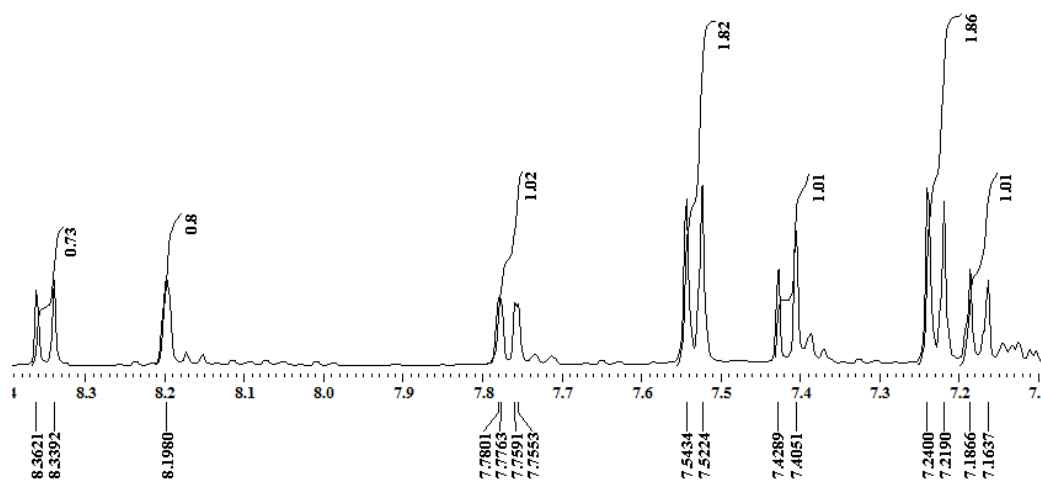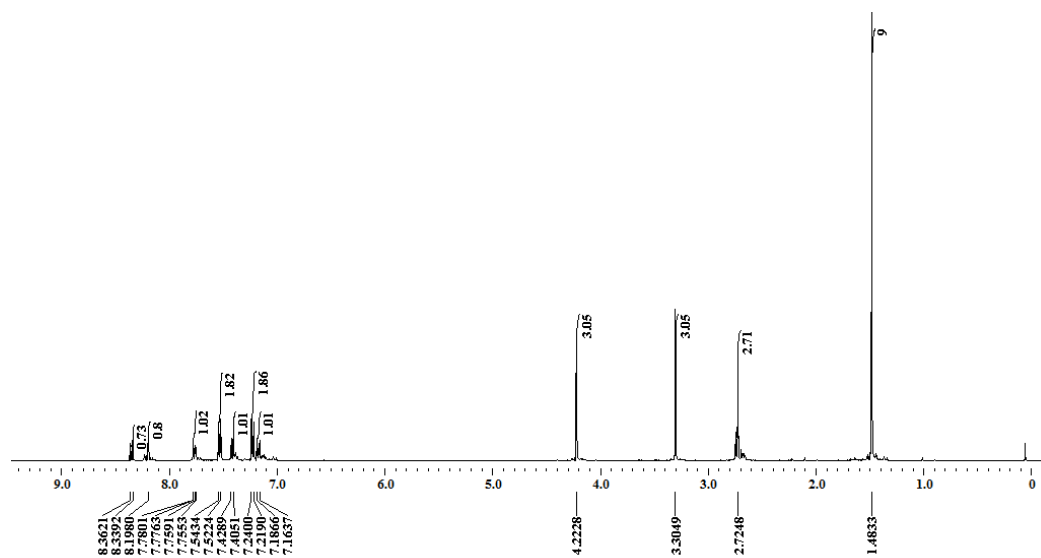

$^{13}\text{C}\{^1\text{H}\}$  NMR

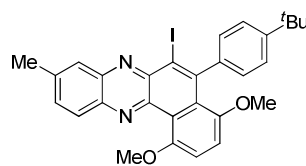

5-(4-(*tert*-Butyl)phenyl)-6-iodo-1,4-dimethoxy-9-methylbenzo[*a*]phenazine (7d)

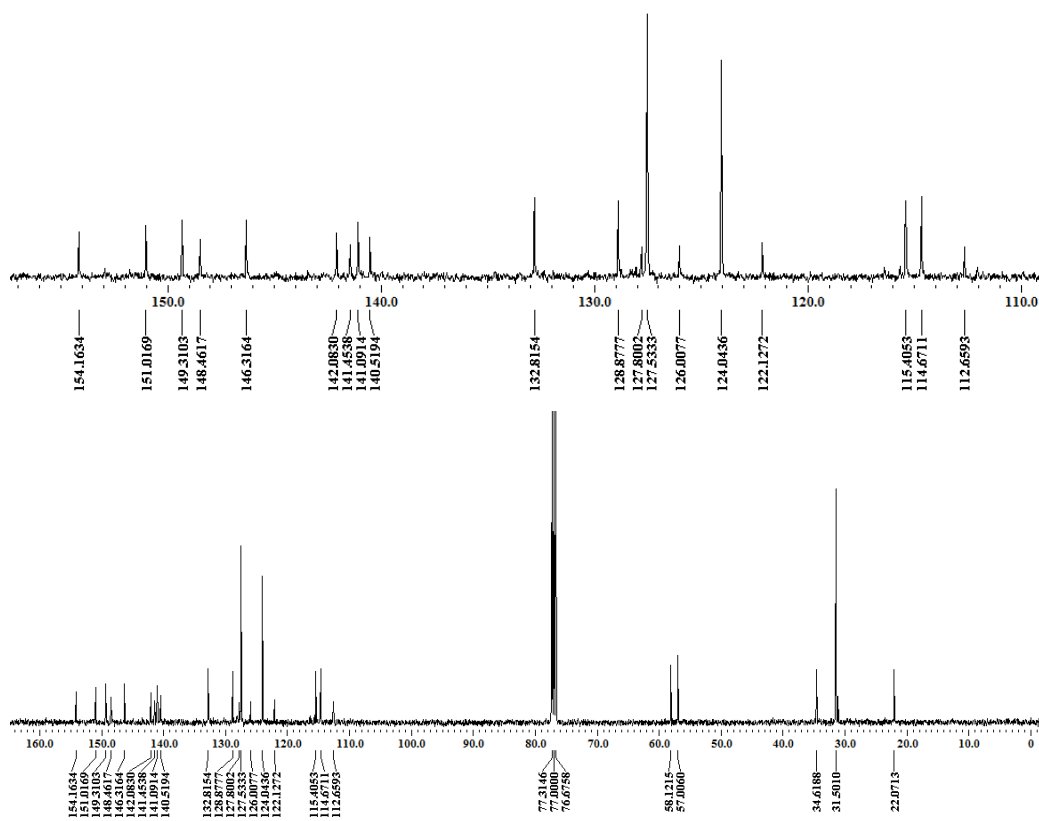

## HRMS

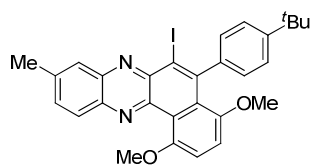

**5-(4-(*tert*-Butyl)phenyl)-6-iodo-1,4-dimethoxy-9-methylbenzo[*a*]phenazine (7d)**

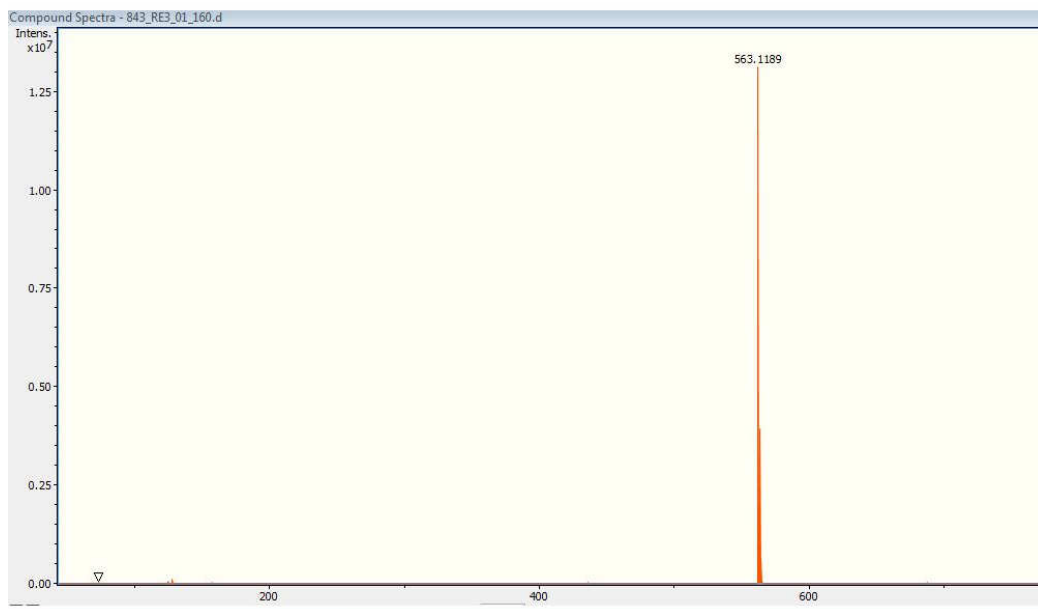

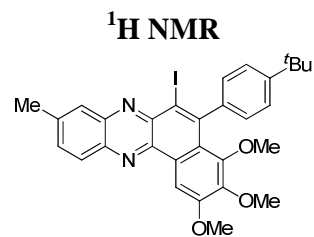

**5-(4-(*tert*-Butyl)phenyl)-6-iodo-2,3,4-trimethoxy-9-methylbenzo[*a*]phenazine (7e)**

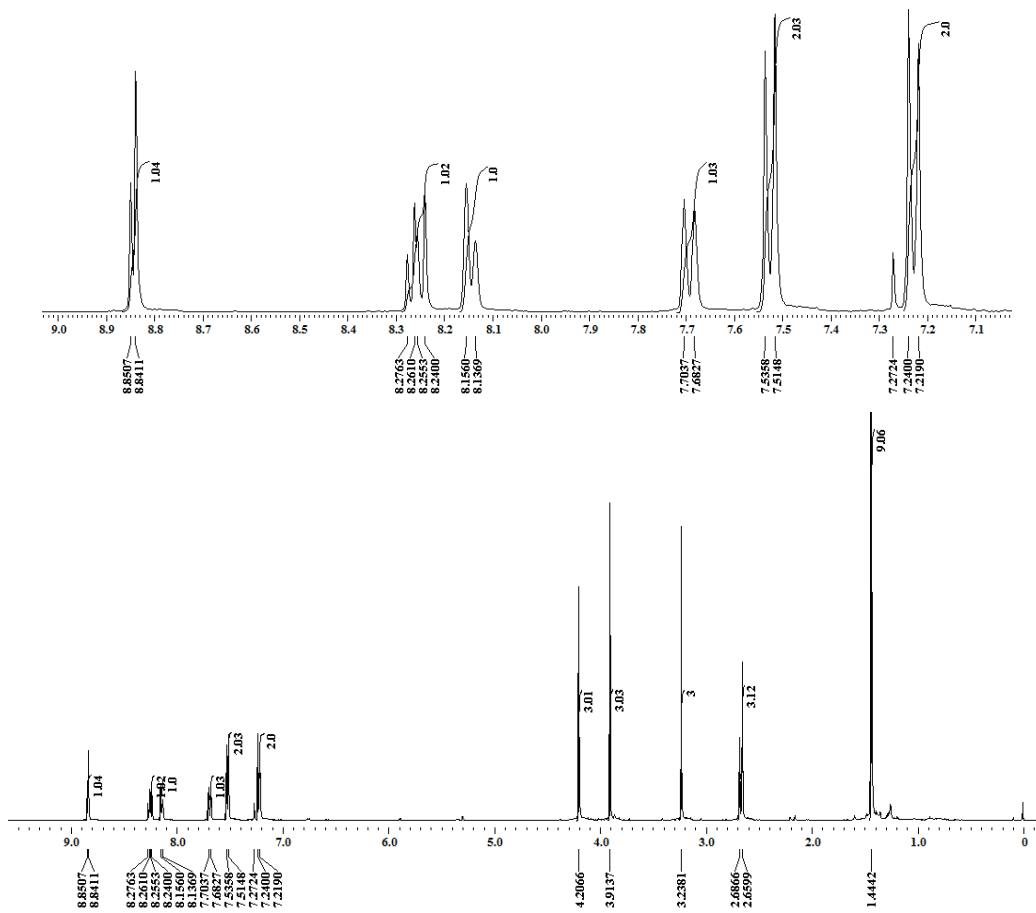

$^{13}\text{C}\{^1\text{H}\}$  NMR

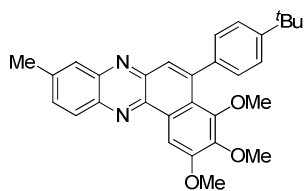

5-(4-(*tert*-Butyl)phenyl)-6-iodo-2,3,4-trimethoxy-9-methylbenzo[*a*]phenazine (7e)

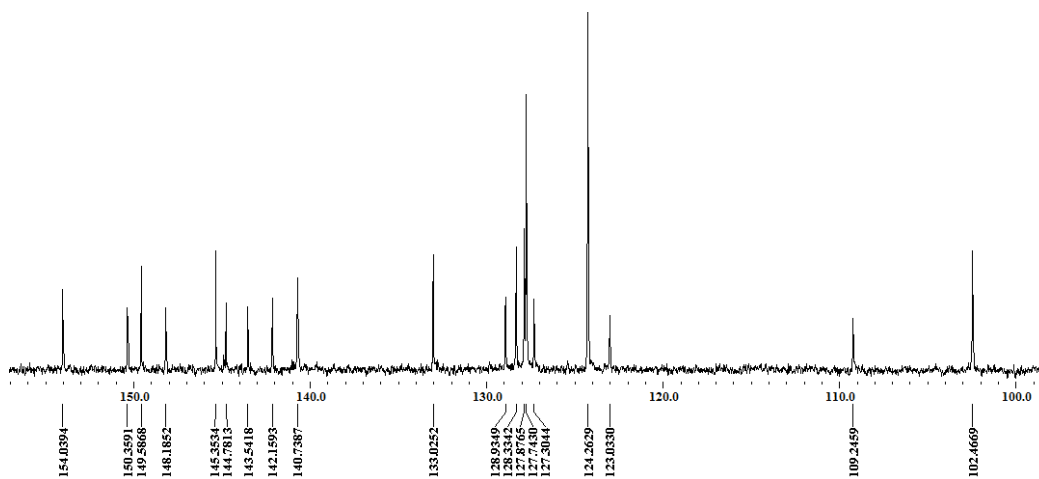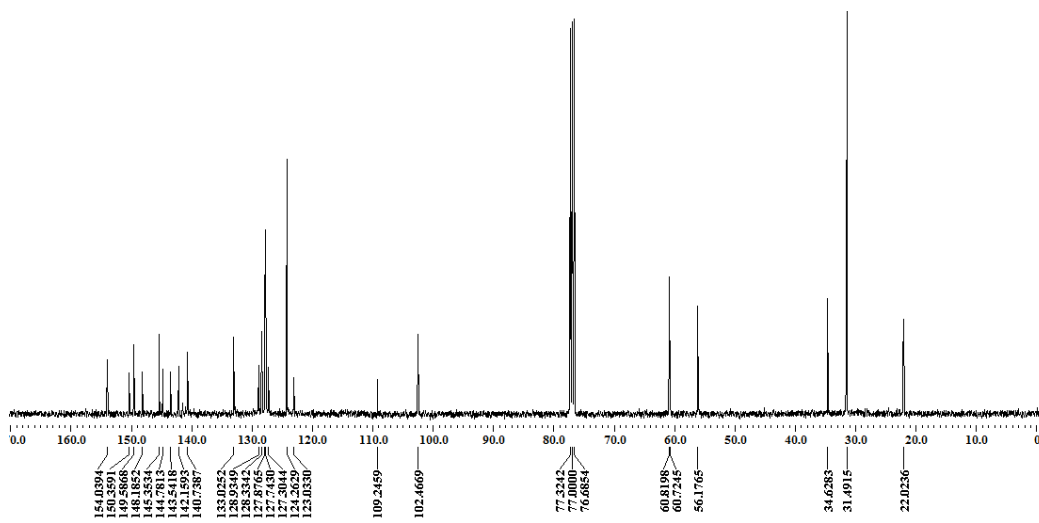



# HRMS

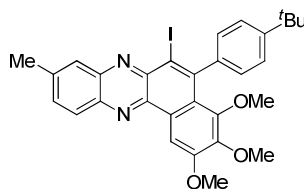

## 5-(4-(tert-Butyl)phenyl)-6-iodo-2,3,4-trimethoxy-9-methylbenzo[a]phenazine (7e)

### Qualitative Compound Report

|                        |              |               |                     |
|------------------------|--------------|---------------|---------------------|
| Data File              | SON-845.d    | Sample Name   | SON-845             |
| Sample Type            | Sample       | Position      | P1-E5               |
| Instrument Name        | Instrument 1 | User Name     |                     |
| Acq Method             | 29_10_2014.m | Acquired Time | 02-11-2016 13:33:02 |
| IRM Calibration Status | Success      | DA Method     | Default.m           |
| Comment                |              |               |                     |

|                |                             |       |
|----------------|-----------------------------|-------|
| Sample Group   |                             | Info. |
| Acquisition SW | 6200 series TOF/6500 series |       |
| Version        | Q-TOF B.05.01 (B5125)       |       |

#### Compound Table

| Compound Label          | RT | Mass     | Formula         | MFG Formula     | MFG Diff (ppm) | DB Formula      |
|-------------------------|----|----------|-----------------|-----------------|----------------|-----------------|
| Cpd 11: C30 H29 I N2 O3 | 15 | 592.1227 | C30 H29 I N2 O3 | C30 H29 I N2 O3 | -0.68          | C30 H29 I N2 O3 |

| Compound Label          | m/z      | RT | Algorithm                 | Mass     |
|-------------------------|----------|----|---------------------------|----------|
| Cpd 11: C30 H29 I N2 O3 | 593.1301 | 15 | Find by Molecular Feature | 592.1227 |

#### MFE MS Spectrum

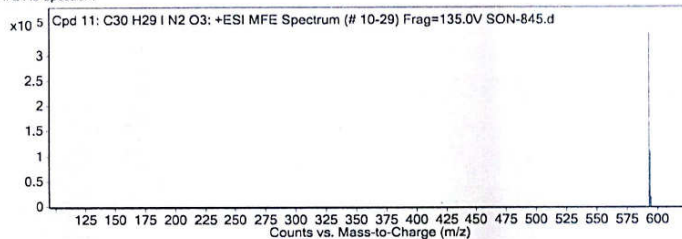

#### MFE MS Zoomed Spectrum

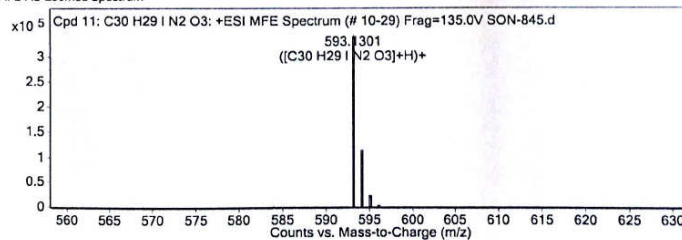

#### MS Spectrum Peak List

| m/z      | z | Abund     | Formula         | Ion    |
|----------|---|-----------|-----------------|--------|
| 593.1301 | 1 | 344171.44 | C30 H29 I N2 O3 | (M+H)+ |
| 594.133  | 1 | 110022.57 | C30 H29 I N2 O3 | (M+H)+ |
| 595.1355 | 1 | 19191.32  | C30 H29 I N2 O3 | (M+H)+ |
| 596.1398 | 1 | 2618.55   | C30 H29 I N2 O3 | (M+H)+ |
| 597.1407 | 1 | 266.96    | C30 H29 I N2 O3 | (M+H)+ |

--- End Of Report ---

# <sup>1</sup>H NMR

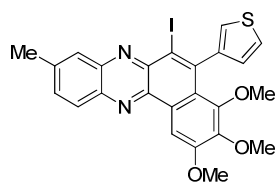

6-Iodo-2,3,4-trimethoxy-9-methyl-5-(thiophen-3-yl)benzo[a]phenazine (7f)

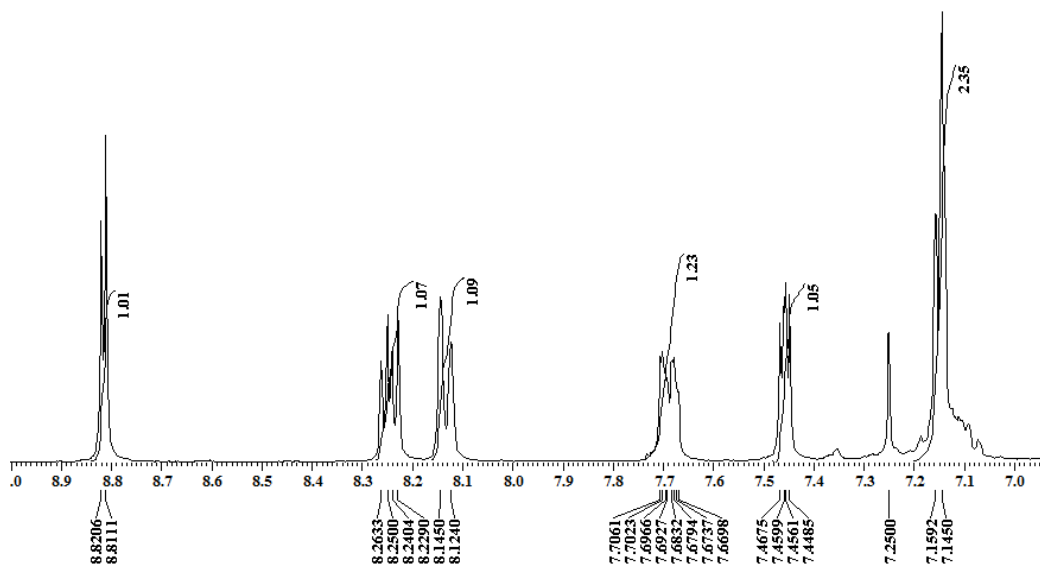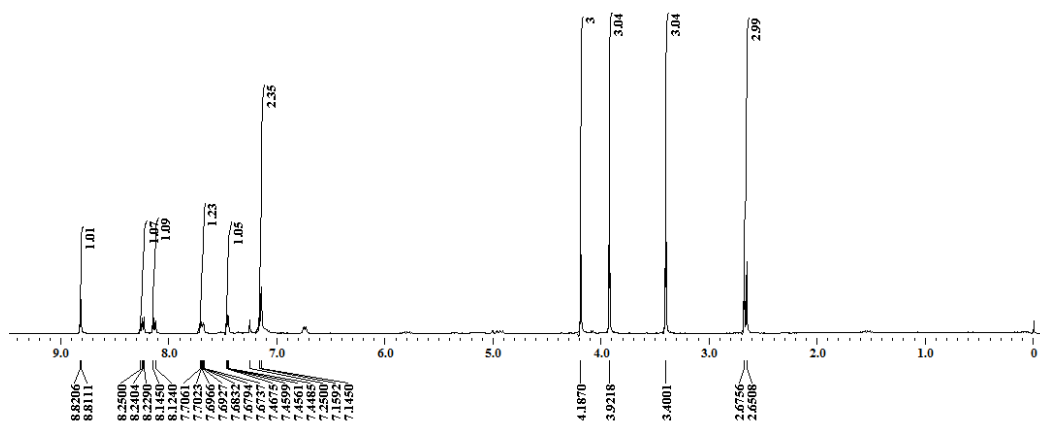

$^{13}\text{C}\{^1\text{H}\}$  NMR

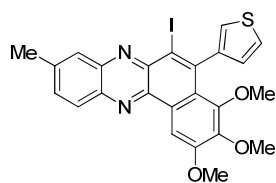

6-Iodo-2,3,4-trimethoxy-9-methyl-5-(thiophen-3-yl)benzo[a]phenazine (7f)

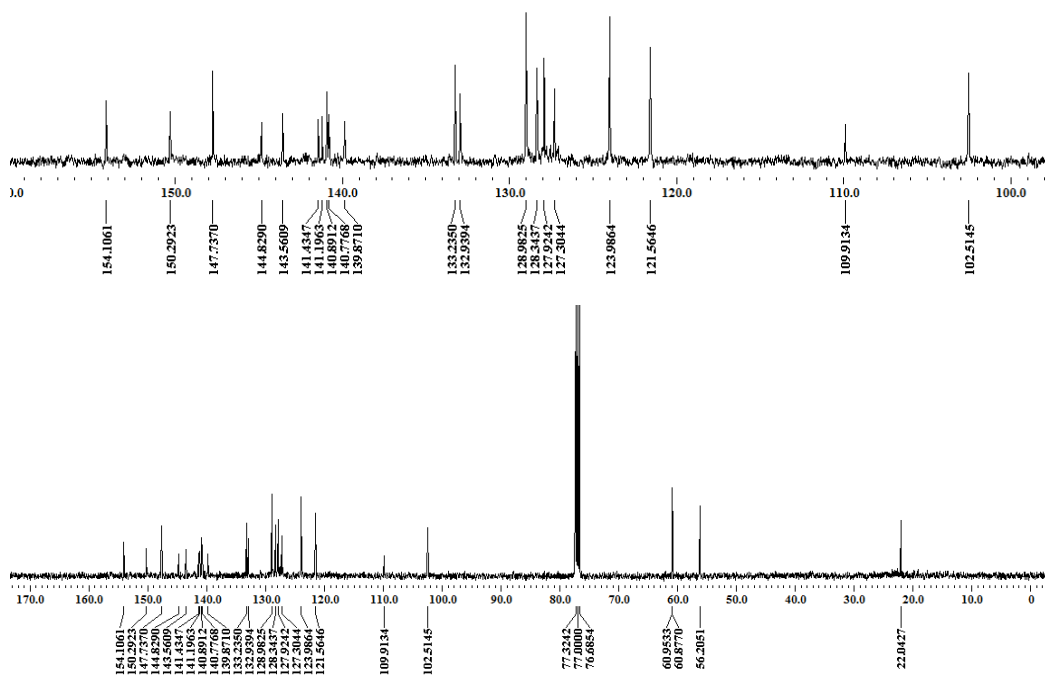

# HRMS

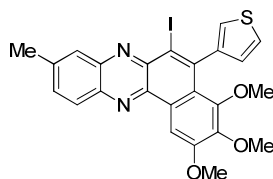

## 6-Iodo-2,3,4-trimethoxy-9-methyl-5-(thiophen-3-yl)benzo[a]phenazine (7f)

### Qualitative Compound Report

|                        |              |               |                     |
|------------------------|--------------|---------------|---------------------|
| Data File              | SON-841.d    | Sample Name   | SON-841             |
| Sample Type            | Sample       | Position      | P1-E6               |
| Instrument Name        | Instrument 1 | User Name     |                     |
| Acq Method             | 29.10.2014.m | Acquired Time | 02-11-2016 14:09:46 |
| IRM Calibration Status | Success      | DA Method     | Default.m           |
| Comment                |              |               |                     |

|                |                             |       |
|----------------|-----------------------------|-------|
| Sample Group   |                             | Info. |
| Acquisition SW | 6200 series TOF/6500 series |       |
| Version        | Q-TOF B.05.01 (B5125)       |       |

#### Compound Table

| Compound Label           | RT | Mass     | Formula           | MFG Formula       | MFG Diff (ppm) | DB Formula        |
|--------------------------|----|----------|-------------------|-------------------|----------------|-------------------|
| Cpd 4: C24 H19 I N2 O3 S | 11 | 542.0173 | C24 H19 I N2 O3 S | C24 H19 I N2 O3 S | -2.19          | C24 H19 I N2 O3 S |

| Compound Label           | m/z      | RT | Algorithm                 | Mass     |
|--------------------------|----------|----|---------------------------|----------|
| Cpd 4: C24 H19 I N2 O3 S | 543.0247 | 11 | Find by Molecular Feature | 542.0173 |

#### MFE MS Spectrum

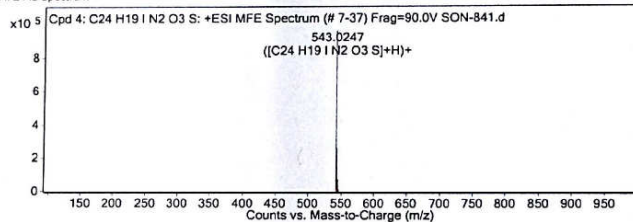

#### MFE MS Zoomed Spectrum

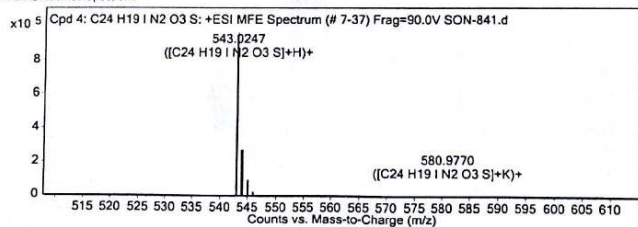

#### MS Spectrum Peak List

| m/z      | z | Abund     | Formula           | Ion    |
|----------|---|-----------|-------------------|--------|
| 543.0247 | 1 | 964477.56 | C24 H19 I N2 O3 S | (M+H)+ |
| 544.0274 | 1 | 257485.45 | C24 H19 I N2 O3 S | (M+H)+ |
| 545.025  | 1 | 73423.08  | C24 H19 I N2 O3 S | (M+H)+ |
| 546.0257 | 1 | 13653.27  | C24 H19 I N2 O3 S | (M+H)+ |
| 547.0269 | 1 | 1971.22   | C24 H19 I N2 O3 S | (M+H)+ |
| 548.023  | 1 | 208.47    | C24 H19 I N2 O3 S | (M+H)+ |
| 580.977  | 1 | 316.52    | C24 H19 I N2 O3 S | (M+K)+ |

--- End Of Report ---

<sup>1</sup>H NMR

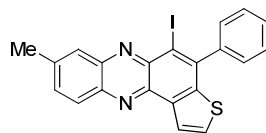

5-Iodo-8-methyl-4-phenylthieno[3,2-a]phenazine (7g)

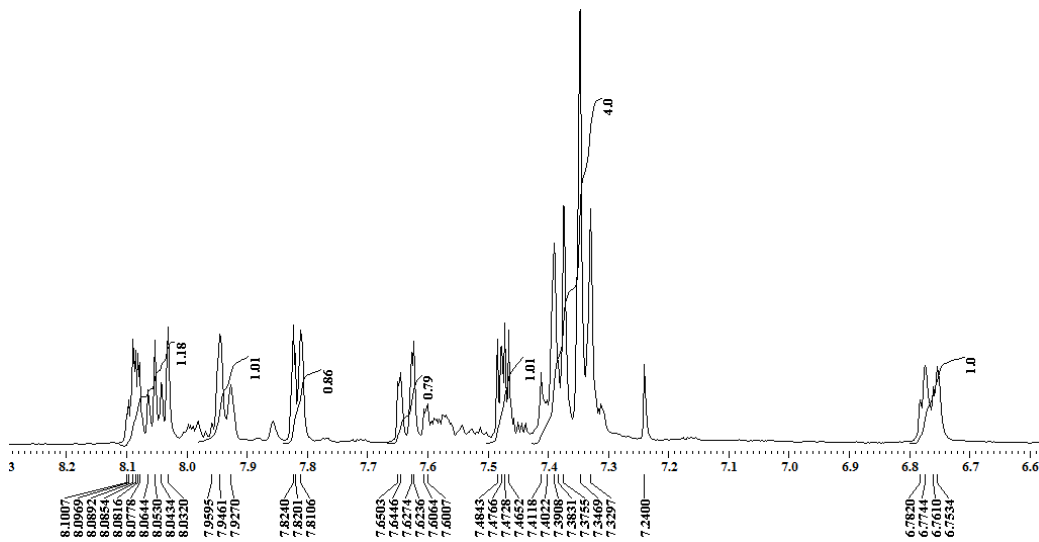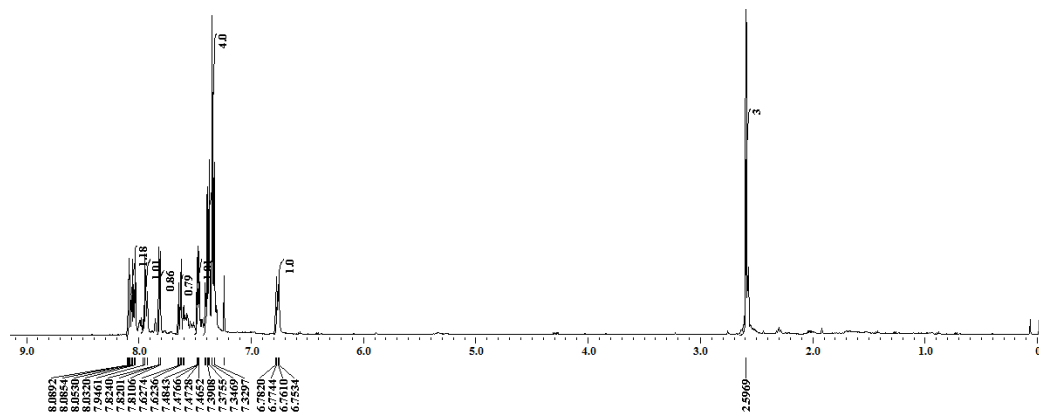

$^{13}\text{C}\{^1\text{H}\}$  NMR

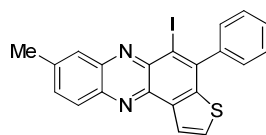

5-Iodo-8-methyl-4-phenylthieno[3,2-a]phenazine (7g)

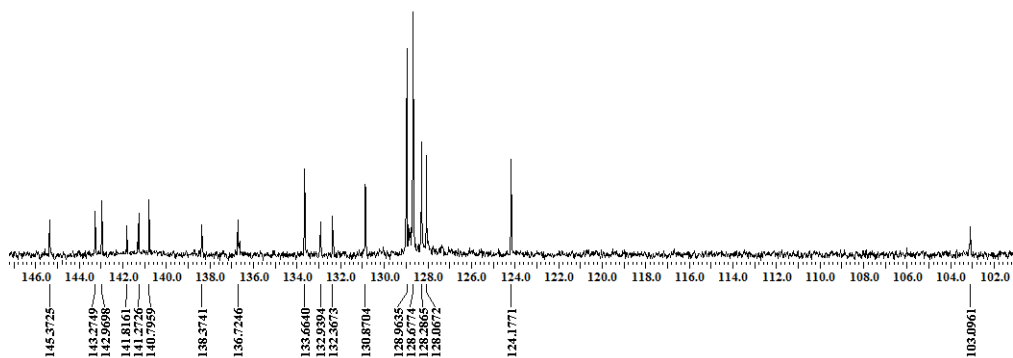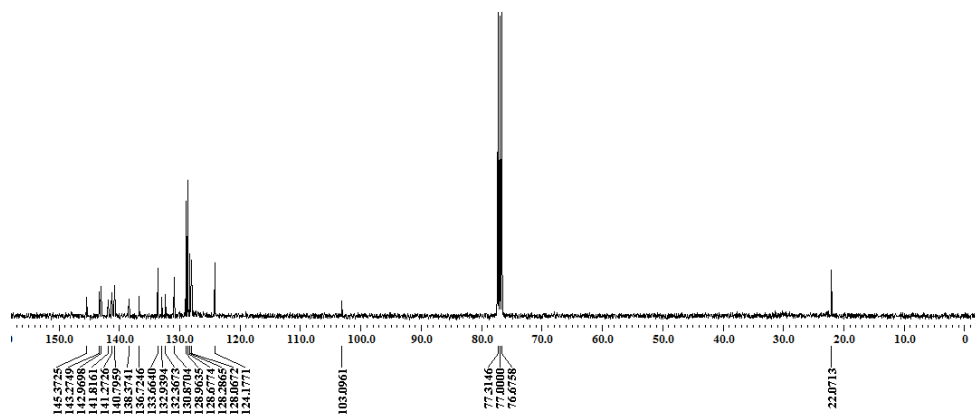

# HRMS



**5-Iodo-8-methyl-4-phenylthieno[3,2-*a*]phenazine (7g)**

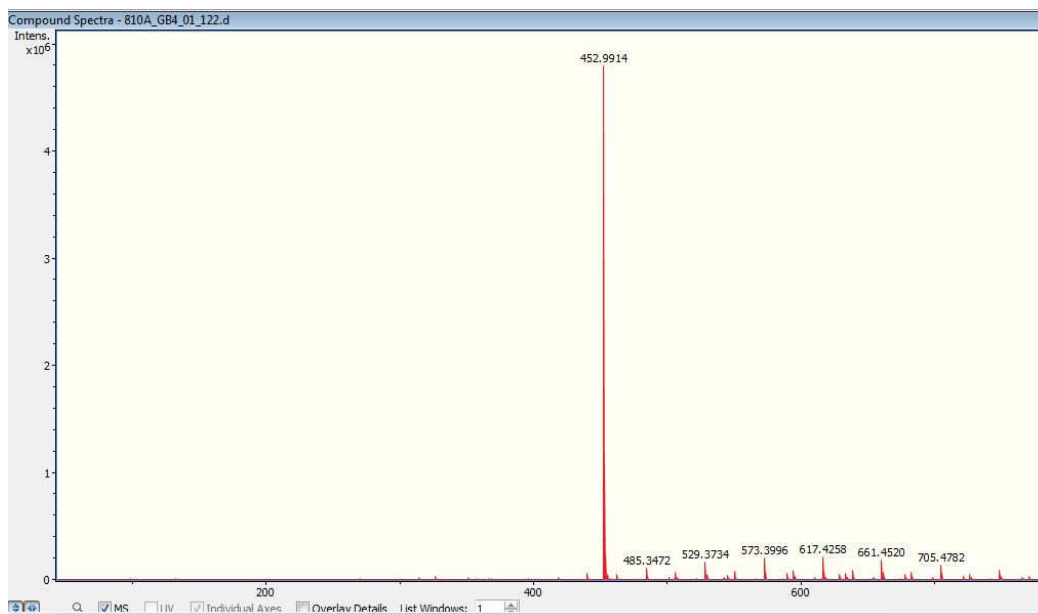

<sup>1</sup>H NMR

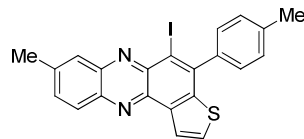

5-Iodo-8-methyl-4-(*p*-tolyl)thieno[3,2-*a*]phenazine (7h)

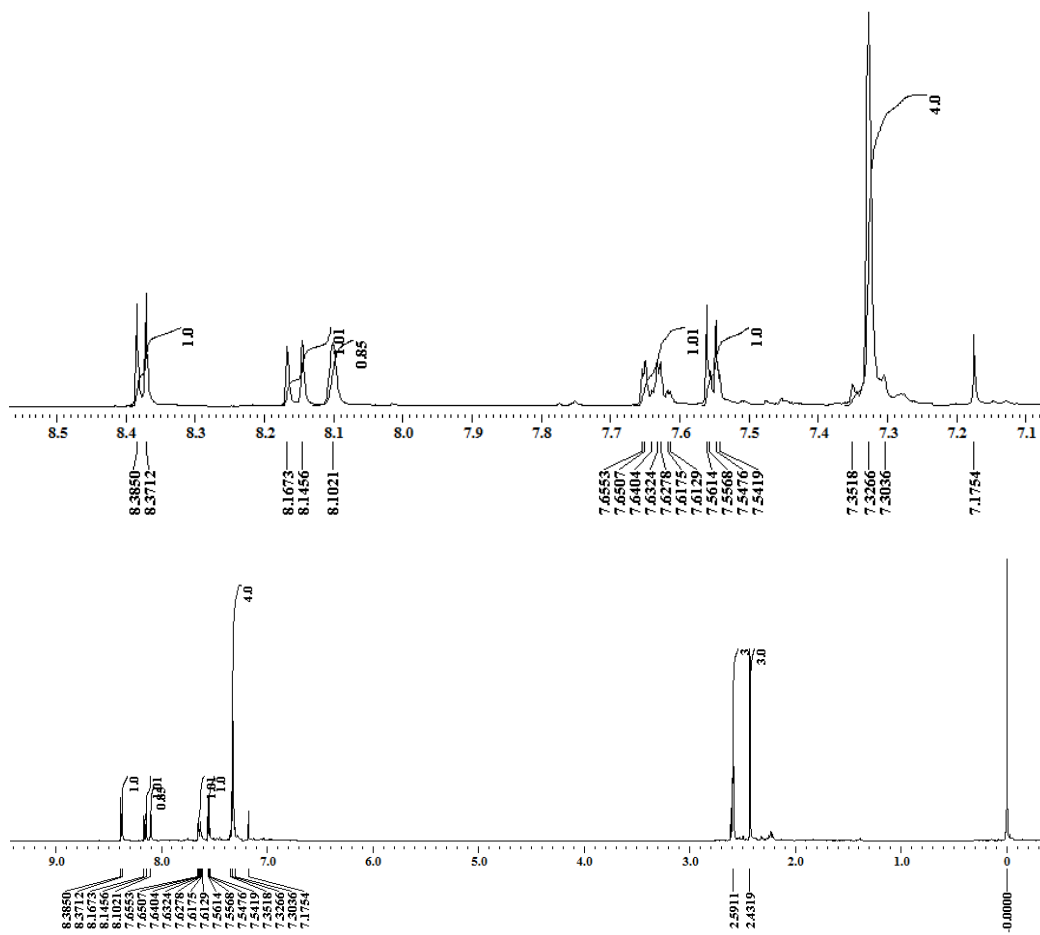



$^{13}\text{C}\{^1\text{H}\}$  NMR

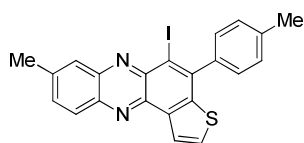

5-Iodo-8-methyl-4-(*p*-tolyl)thieno[3,2-*a*]phenazine (7h)

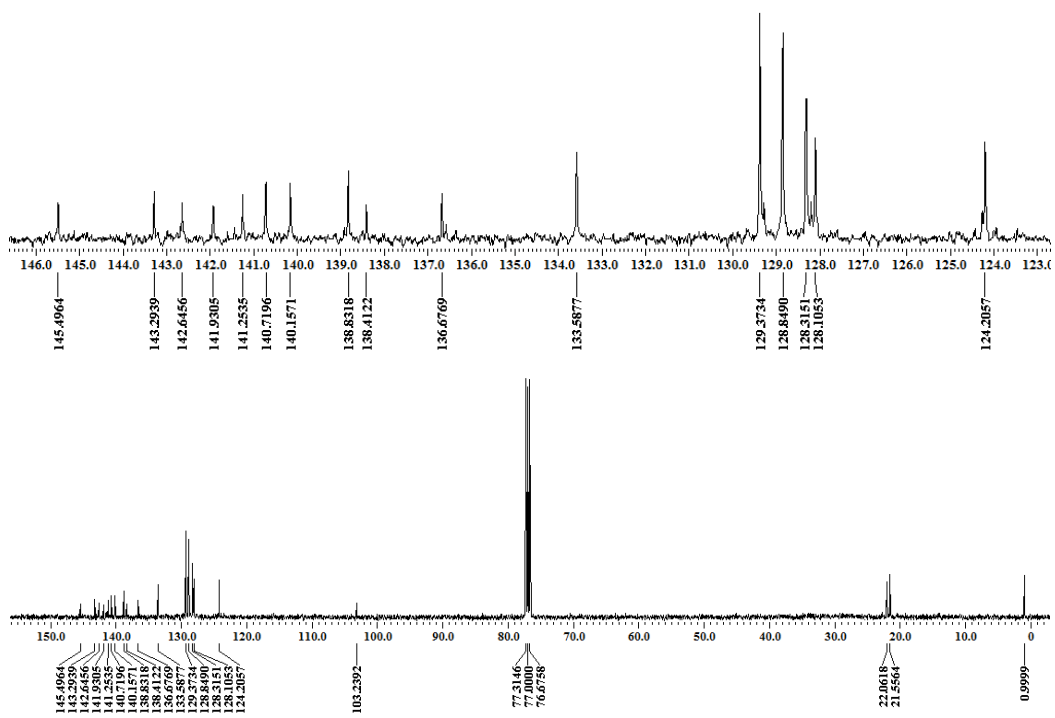

# HRMS

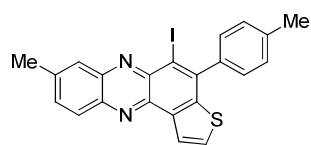

**5-Iodo-8-methyl-4-(*p*-tolyl)thieno[3,2-*a*]phenazine (7h)**

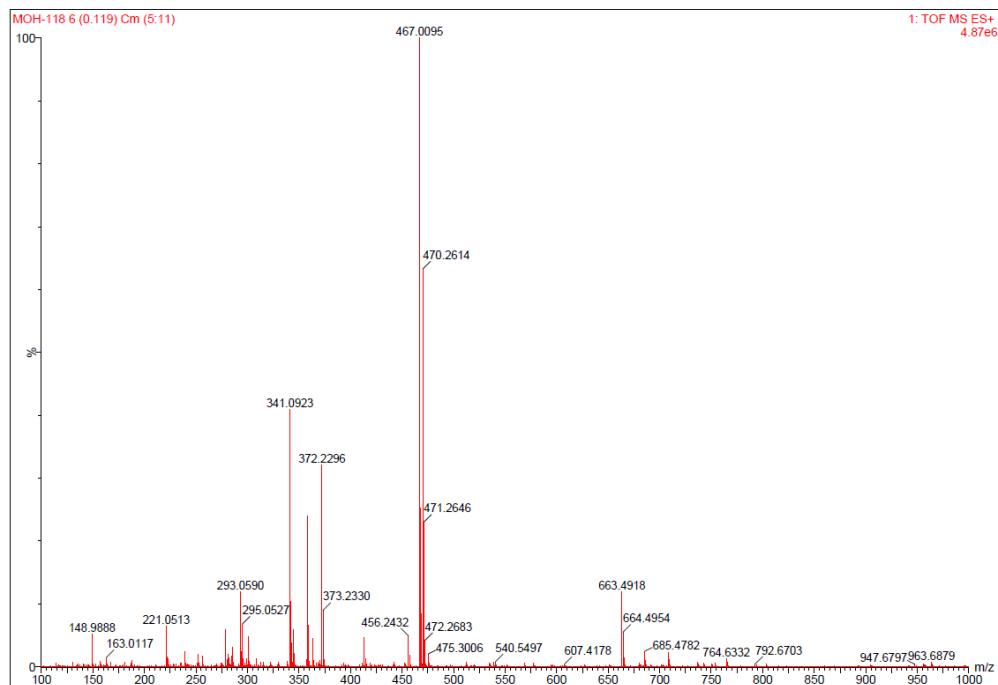

# <sup>1</sup>H NMR

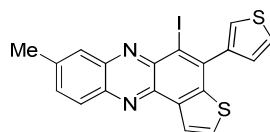

5-Iodo-8-methyl-4-(thiophen-3-yl)thieno[3,2-a]phenazine (7i)

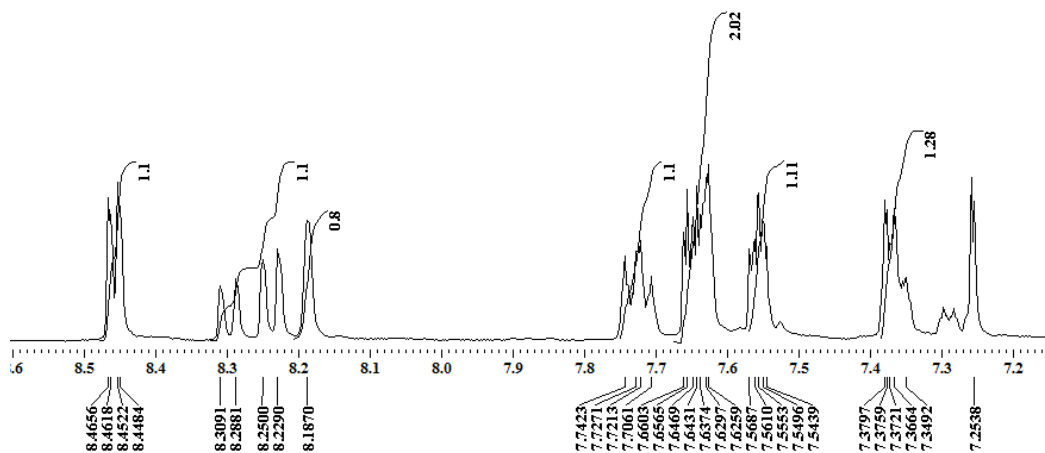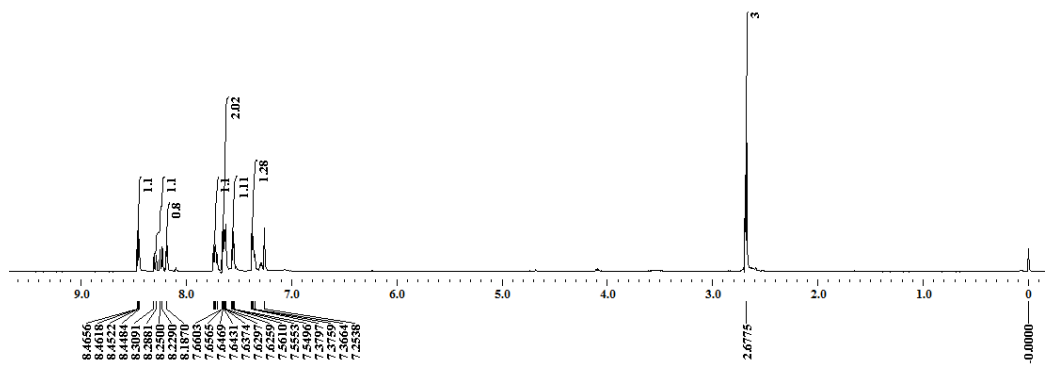

$^{13}\text{C}\{^1\text{H}\}$  NMR



5-Iodo-8-methyl-4-(thiophen-3-yl)thieno[3,2-*a*]phenazine (7i)

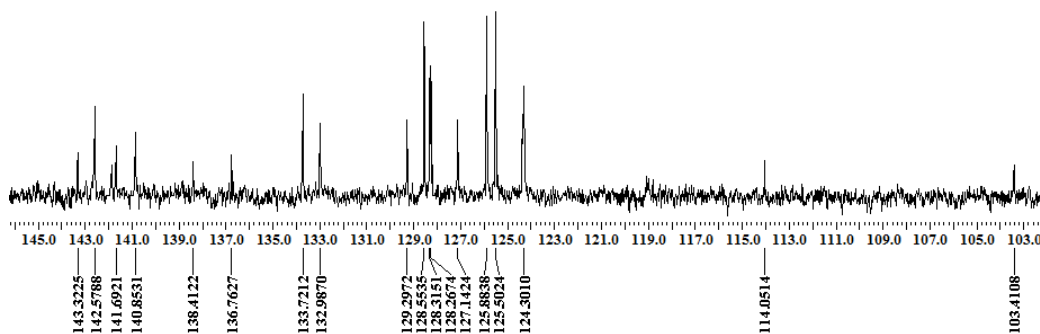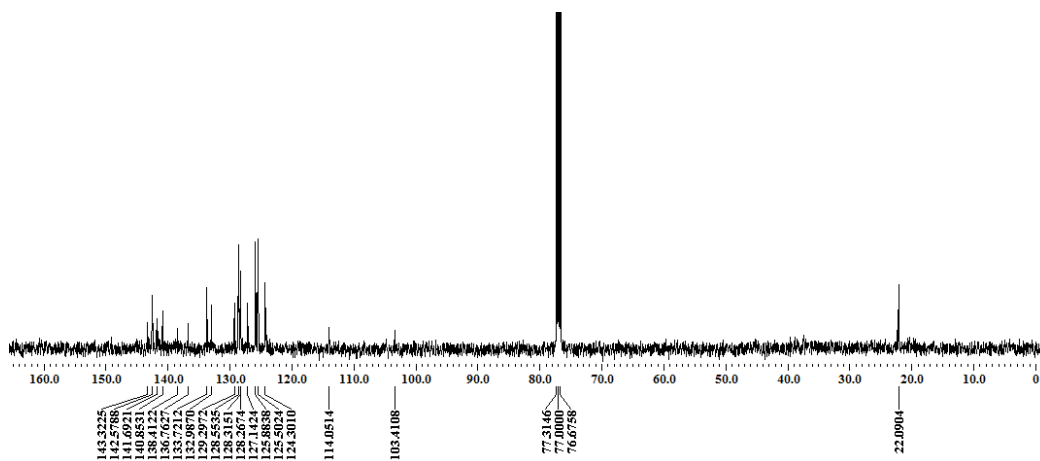

# HRMS

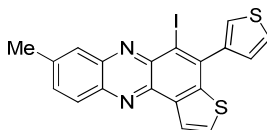

## 5-Iodo-8-methyl-4-(thiophen-3-yl)thieno[3,2-a]phenazine (7i)

### Qualitative Compound Report

|                        |              |               |                     |
|------------------------|--------------|---------------|---------------------|
| Data File              | SON-846.d    | Sample Name   | SON-846             |
| Sample Type            | Sample       | Position      | P1-B2               |
| Instrument Name        | Instrument 1 | User Name     |                     |
| Acq Method             | 29.10.2014.m | Acquired Time | 03-11-2016 12:26:35 |
| IRM Calibration Status | Success      | DA Method     | Default.m           |
| Comment                |              |               |                     |

|                |                             |
|----------------|-----------------------------|
| Sample Group   | Info.                       |
| Acquisition SW | 6200 series TOF/6500 series |
| Version        | Q-TOF B.05.01 (B5125)       |

#### Compound Table

| Compound Label         | RT | Mass    | Formula         | MFG Formula     | MFG Diff (ppm) | DB Formula      |
|------------------------|----|---------|-----------------|-----------------|----------------|-----------------|
| Cpd 8: C19 H11 I N2 S2 | 11 | 457.943 | C19 H11 I N2 S2 | C19 H11 I N2 S2 | -4.84          | C19 H11 I N2 S2 |

| Compound Label         | m/z      | RT | Algorithm                 | Mass    |
|------------------------|----------|----|---------------------------|---------|
| Cpd 8: C19 H11 I N2 S2 | 458.9482 | 11 | Find by Molecular Feature | 457.943 |

#### MFE MS Spectrum

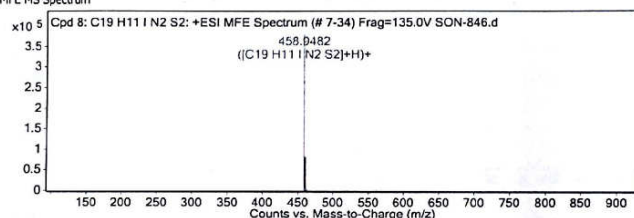

#### MFE MS Zoomed Spectrum

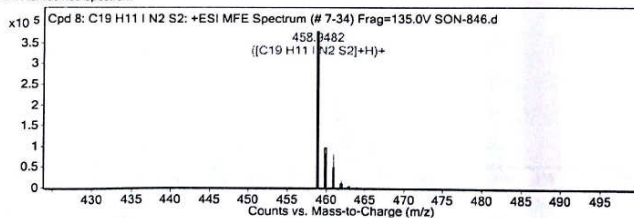

#### MS Spectrum Peak List

| m/z      | z | Abund     | Formula         | Ion    |
|----------|---|-----------|-----------------|--------|
| 458.9482 | 1 | 378854.38 | C19 H11 I N2 S2 | (M+H)+ |
| 459.9508 | 1 | 82025.02  | C19 H11 I N2 S2 | (M+H)+ |
| 460.9574 | 1 | 81069.12  | C19 H11 I N2 S2 | (M+H)+ |
| 461.961  | 1 | 16956.36  | C19 H11 I N2 S2 | (M+H)+ |
| 462.9585 | 1 | 6599.04   | C19 H11 I N2 S2 | (M+H)+ |
| 463.9646 | 1 | 1302.4    | C19 H11 I N2 S2 | (M+H)+ |
| 464.956  | 1 | 201.26    | C19 H11 I N2 S2 | (M+H)+ |

--- End Of Report ---

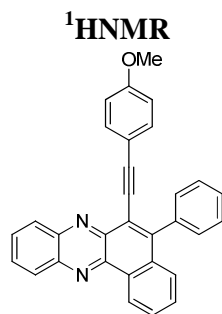

**6-((4-Methoxyphenyl)ethynyl)-5-phenylbenzo[*a*]phenazine (10)**

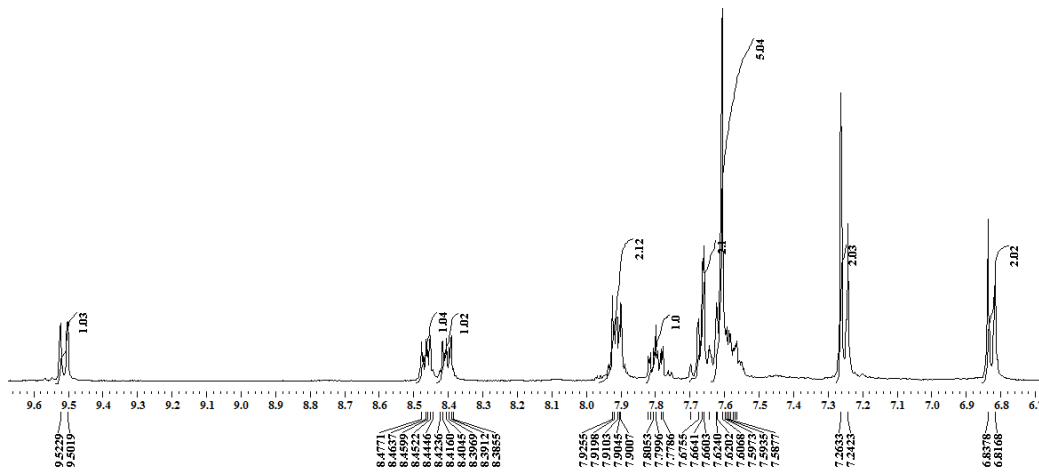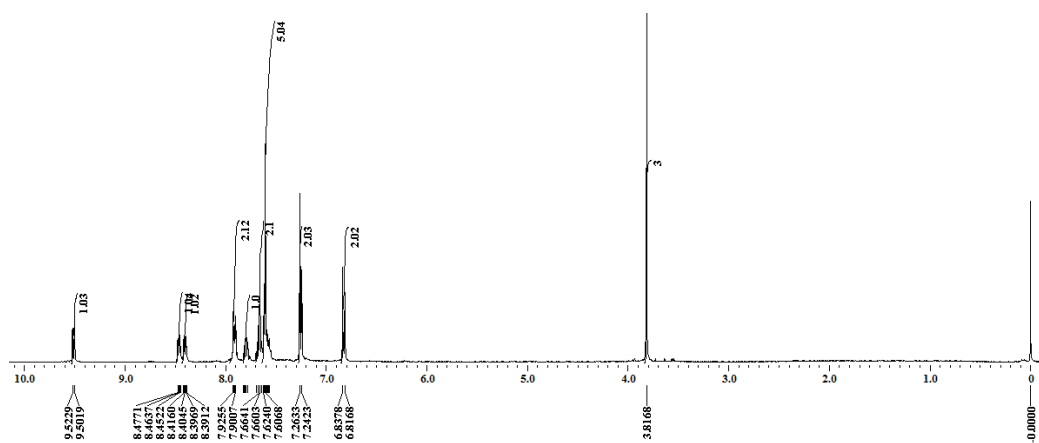

$^{13}\text{C}\{^1\text{H}\}$  NMR

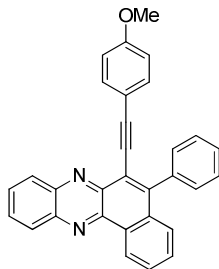

6-((4-Methoxyphenyl)ethynyl)-5-phenylbenzo[a]phenazine (10)

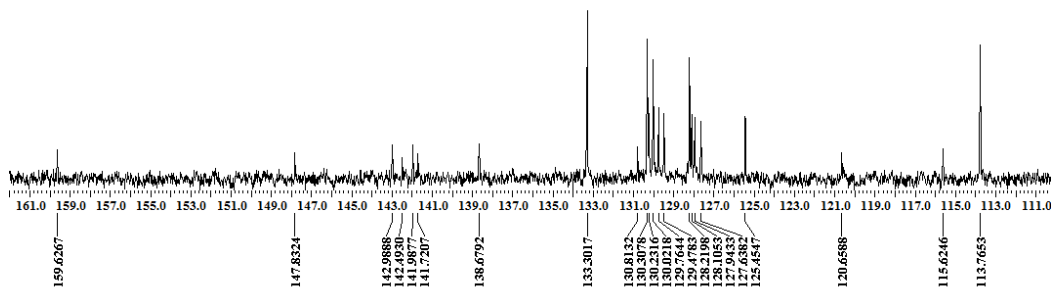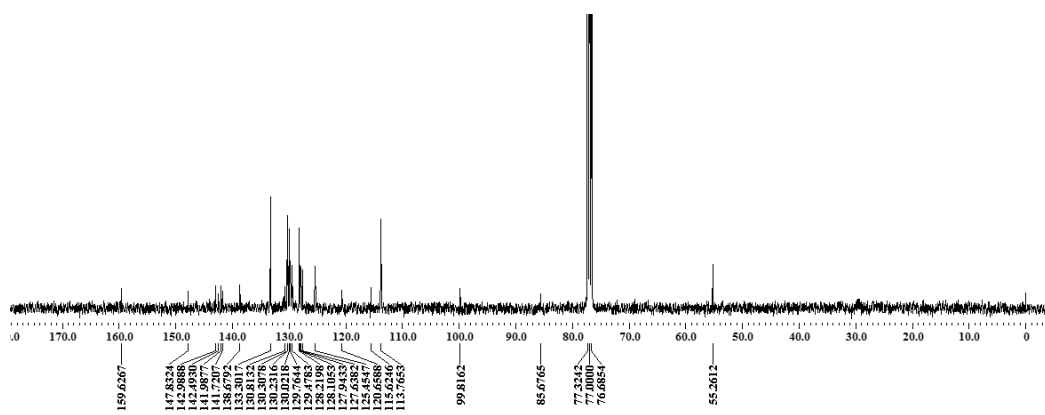

# HRMS

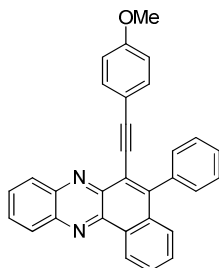

## 6-((4-Methoxyphenyl)ethynyl)-5-phenylbenzo[a]phenazine (10)

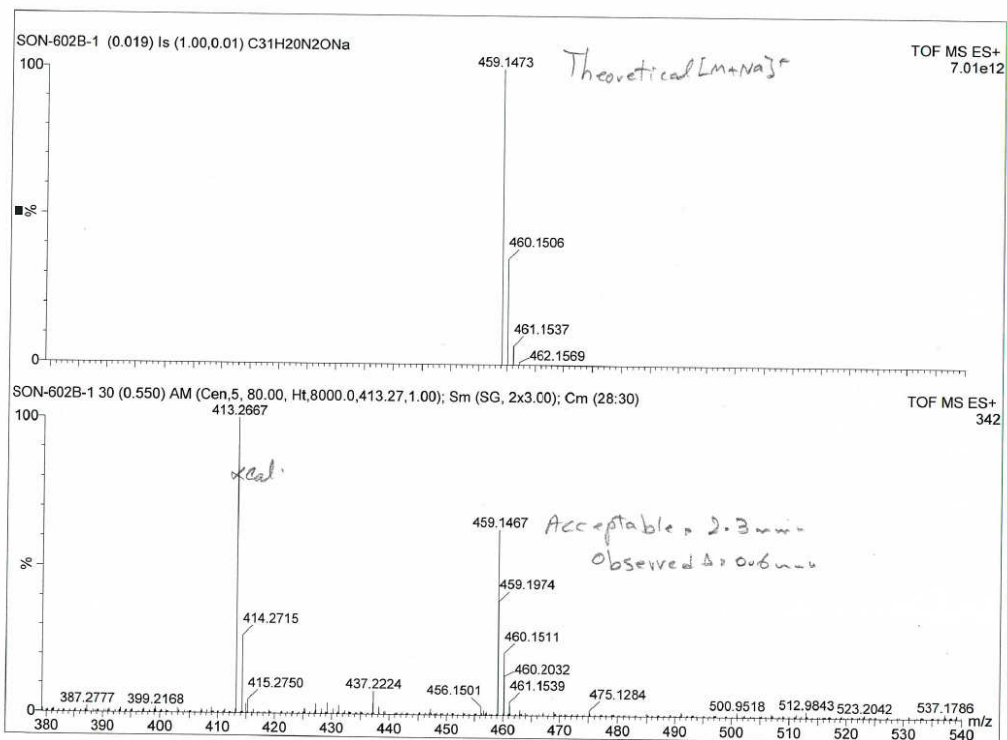



# <sup>1</sup>H NMR

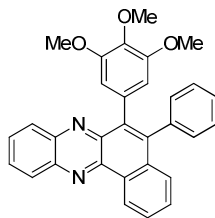

**5-Phenyl-6-(3,4,5-trimethoxyphenyl)benzo[*a*]phenazine (11)**

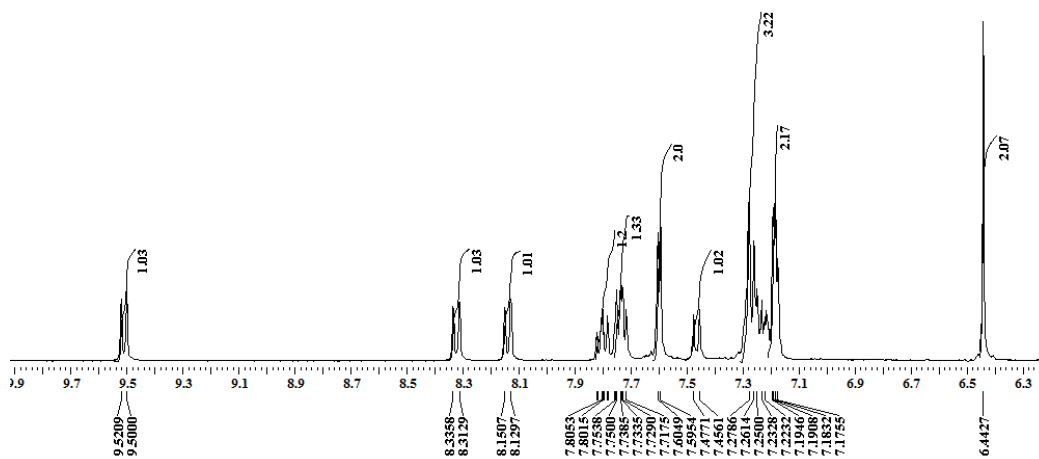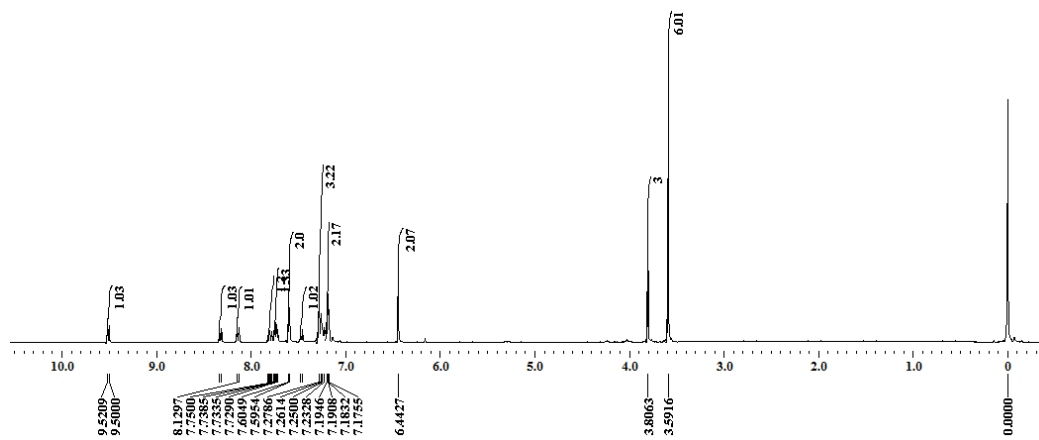

$^{13}\text{C}\{^1\text{H}\}$  NMR

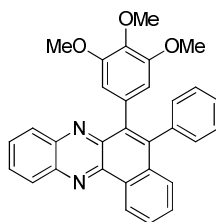

5-Phenyl-6-(3,4,5-trimethoxyphenyl)benzo[a]phenazine (11)

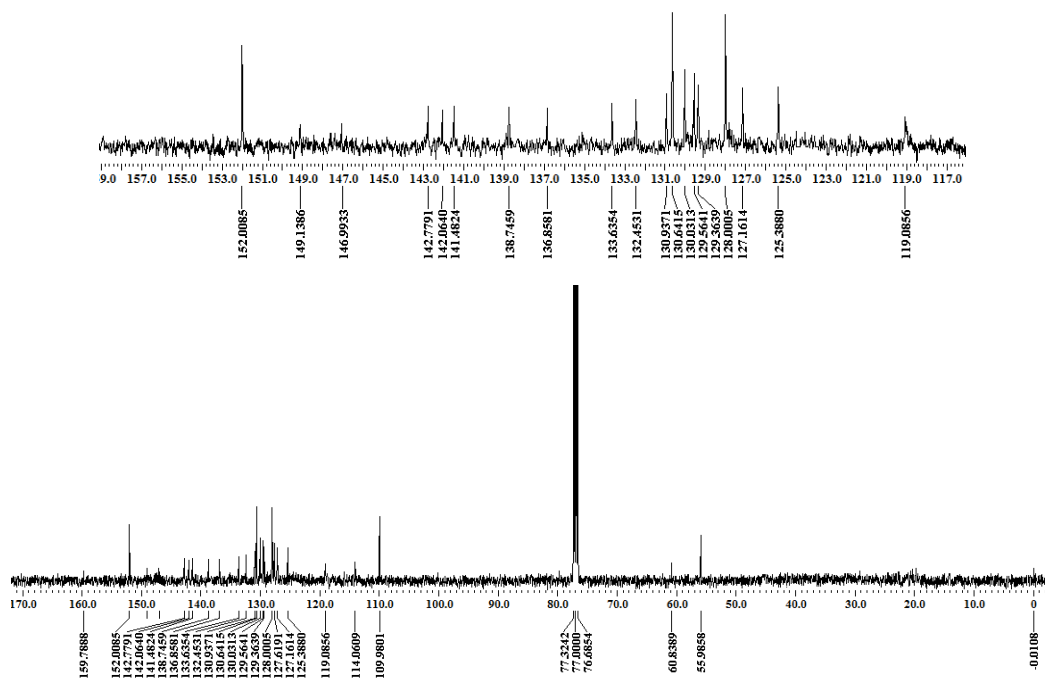

## HRMS

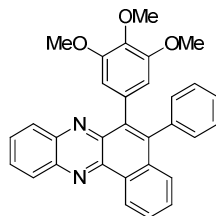

**5-Phenyl-6-(3,4,5-trimethoxyphenyl)benzo[a]phenazine (11)**

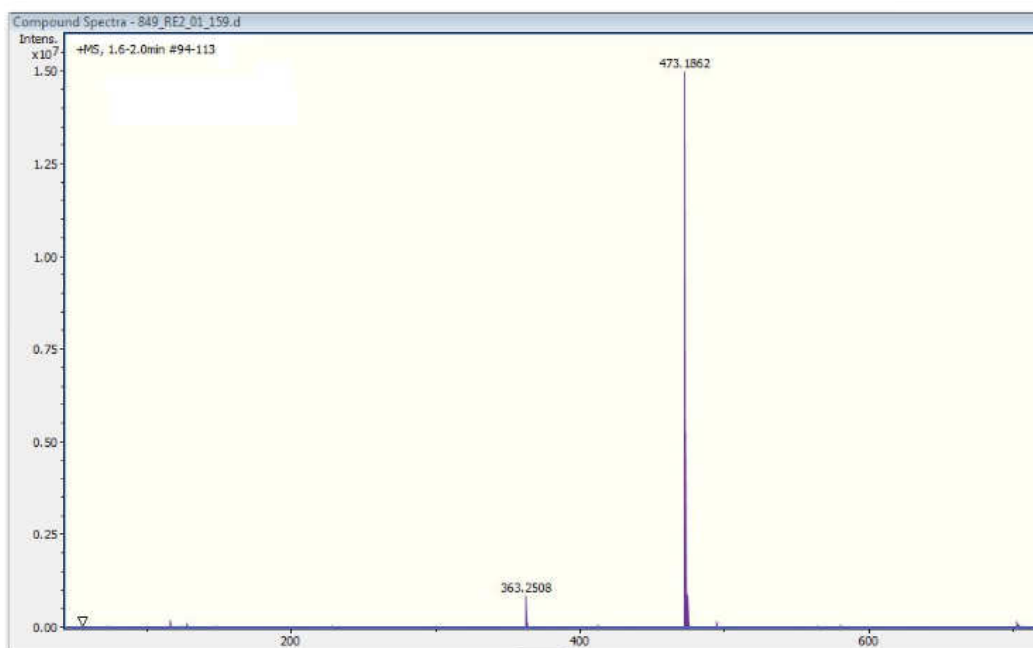

Supplement: c7ob00671c1.pdf [file c7ob00671c1.pdf]
